# Supplementary material for: Ru(ii)-Catalyzed, Cu(ii)-mediated carbene migratory insertion in the synthesis of trisubstituted pyrroles from isoxazoles
Source: Royal Society of Chemistry journal article supplement (doi:10.1039/d1ob00255d), 2021-01-01

## Supporting Information

### **Ru(II)-catalyzed, Cu(II)-mediated Carbene Migratory Insertion in the Synthesis of Trisubstituted Pyrroles from Isoxazoles**

Pravin Kumar, Santosh Kumar Keshri and Manmohan Kapur\*

*Department of Chemistry, Indian Institute of Science Education and Research Bhopal, Bhopal Bypass Road, Bhauri, Bhopal 462066, MP, India.*

*mk@iiserb.ac.in*

#### **Table of contents**

|                                                                         |               |
|-------------------------------------------------------------------------|---------------|
| Experimental details for new compounds                                  | Pages S2-S18  |
| References                                                              | Pages S18     |
| <sup>1</sup> H and <sup>13</sup> C NMR spectra of new compounds         | Pages S19-S67 |
| X-ray diffraction structural analysis data of <b>3j</b> and <b>3ad</b>  | Pages S68-71  |
| MS Studies for the detection of the intermediates <b>4</b> and <b>F</b> | Pages S72-73  |

## **Experimental:**

### **(1) General Methods:**

All commercially available compounds were used without purification. Unless otherwise noted, all reactions were performed in oven-dried glassware. All reactions were run under argon or nitrogen atmosphere. All solvents used in the reactions were distilled before use. Dry tetrahydrofuran and toluene were distilled from sodium and benzophenone; whereas dry dichloromethane, dichloroethane and xylene were distilled from CaH<sub>2</sub>.<sup>1</sup> Petroleum ether with a boiling range of 40-60 °C was used. Melting points are uncorrected. <sup>1</sup>H, <sup>13</sup>C and <sup>19</sup>F NMR: Recorded on Bruker Avance III 400 MHz NMR Spectrometer, Bruker Avance III 500 MHz NMR Spectrometer; spectra were recorded at 295 K in CDCl<sub>3</sub>; chemical shifts are calibrated to the residual proton and carbon resonance of the solvent: CDCl<sub>3</sub> (1H δ 7.26; 13C δ 77.0). HRMS: Bruker Daltonics MicroTOFQ-II with electron spray ionization (ESI) and Atmospheric Pressure Chemical Ionization (APCI). GC-HRMS: Performed on Agilent 7200 GC-QToF (with Electron Impact (EI), 70eV) with 7890A GC using DB-5 column. GC-LRMS: Performed on Agilent 7890A GC with Agilent 5975C MS (EI 70 eV) using DB-5 column. IR: Perkin Elmer Spectrum BX FTIR, Shimadzu IRAffinity-1 FTIR and were recorded as thin films between KBr plates. Single-crystal X-ray diffraction data were collected using a Bruker SMART APEX II CCD diffractometer with graphite monochromated Mo Kα (λ = 0.71073 Å) radiation at low temperature.

### **(2) General procedures:**

#### **(2.1) Preparation of 3, 5-diaryl isoxazoles:<sup>2</sup>**

##### **3, 5-diphenylisoxazole (1a):<sup>2</sup>**

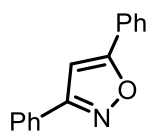

Prepared according to the general procedure and the title compound was isolated in 71% (550 mg) yield. Spectral data obtained were in good agreement with those reported in the literature.

##### **3-(2-methoxyphenyl)-5-phenylisoxazole (1b):<sup>2</sup>**

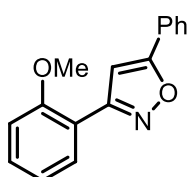

Prepared according to the general procedure and the title compound was isolated in 62% (545 mg) yield;

### 3-(2-fluorophenyl)-5-phenylisoxazole (1c):<sup>2</sup>

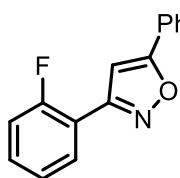

Prepared according to the general procedure and the title compound was isolated in 48% (402 mg) yield. Spectral data obtained were in good agreement with those reported in the literature.

### 3-(3-methoxyphenyl)-5-phenylisoxazole (1d):<sup>2</sup>

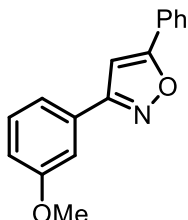

Prepared according to the general procedure and the title compound was isolated in 52% (457 mg) yield. Spectral data obtained were in good agreement with those reported in the literature.

### 5-phenyl-3-(*m*-tolyl)isoxazole (1e):<sup>2</sup>

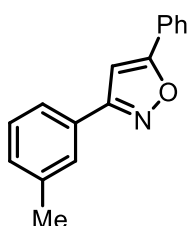

Prepared according to the general procedure and the title compound was isolated in 56% (461 mg) yield. Spectral data obtained were in good agreement with those reported in the literature.

### 5-phenyl-3-(3-(trifluoromethyl)phenyl)isoxazole (1f):<sup>3</sup>

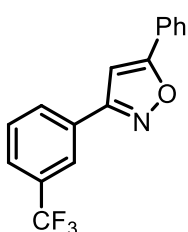

Prepared according to the general procedure and the title compound was isolated in 46% (465 mg) yield. Spectral data obtained were in good agreement with those reported in the literature.

### 5-phenyl-3-(*p*-tolyl)isoxazole (1g):<sup>2</sup>

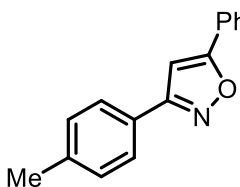

Prepared according to the general procedure and the title compound was isolated in 72% (592 mg) yield. Spectral data obtained were in good agreement with those reported in the literature.

### 3-(4-methoxyphenyl)-5-phenylisoxazole (1h):<sup>2</sup>

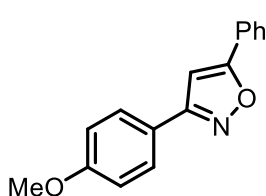

Prepared according to the general procedure and the title compound was isolated in 75% (659 mg) yield. Spectral data obtained were in good agreement with those reported in the literature.

### 3-([1,1'-biphenyl]-4-yl)-5-phenylisoxazole (1i):<sup>3</sup>

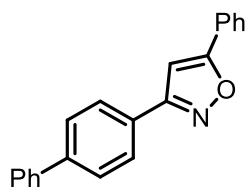

Prepared according to the general procedure and the title compound was isolated in 50% (520 mg) yield. Spectral data obtained were in good agreement with those reported in the literature.

### 3-(4-fluorophenyl)-5-phenylisoxazole (1j):<sup>2</sup>

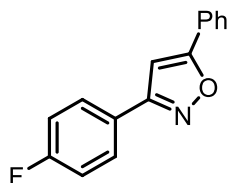

Prepared according to the general procedure and the title compound was isolated in 49% (410 mg) yield. Spectral data obtained were in good agreement with those reported in the literature.

### 3-(naphthalen-1-yl)-5-phenylisoxazole (1k):<sup>4</sup>

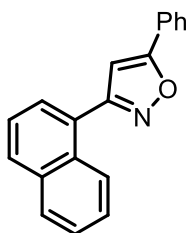

Prepared according to the general procedure and the title compound was isolated in 52% (494 mg) yield. Spectral data obtained were in good agreement with those reported in the literature.

### 3-(3,4-dimethylphenyl)-5-phenylisoxazole (1l):<sup>3</sup>

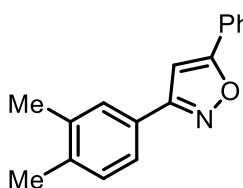

Prepared according to the general procedure and the title compound was isolated in 72% (628 mg) yield. Spectral data obtained were in good agreement with those reported in the literature.

### 3-phenyl-5-(*p*-tolyl)isoxazole (1m):<sup>3</sup>

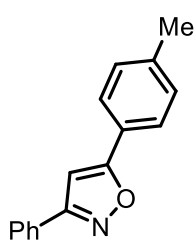

Prepared according to the general procedure and the title compound was isolated in 62% (510 mg) yield. Spectral data obtained were in good agreement with those reported in the literature.



### 5-(4-fluorophenyl)-3-phenylisoxazole (1n):<sup>3</sup>

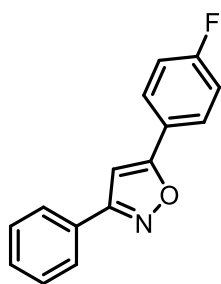

Prepared according to the general procedure and the title compound was isolated in 47% (393 mg) yield. Spectral data obtained were in good agreement with those reported in the literature.

### 3-cyclohexyl-5-phenylisoxazole (1o):<sup>3</sup>

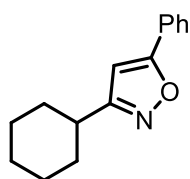

Prepared according to the general procedure and the title compound was isolated in 44% (350 mg) yield. Spectral data obtained were in good agreement with those reported in the literature.

### 3-isopropyl-5-phenylisoxazole (1p):<sup>5</sup>

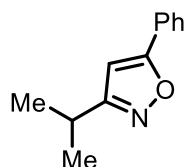

Prepared according to the general procedure and the title compound was isolated in 42% (275 mg) yield. Spectral data obtained were in good agreement with those reported in the literature.

### 3-ethyl-5-phenylisoxazole (1q):<sup>4</sup>

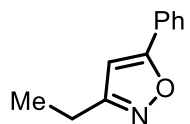

Prepared according to the general procedure and the title compound was isolated in 41% (244 mg) yield. Spectral data obtained were in good agreement with those reported in the literature.

### 3-(2-fluorophenyl)-5-(*p*-tolyl)isoxazole (1r):

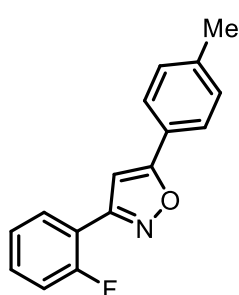

Prepared according to the general procedure and the title compound was isolated in 52% (461 mg) yield; Physical appearance: Colorless solid; M.p. 48-50 °C; TLC  $R_f$  0.3 (19:1, Petroleum ether: EtOAc); <sup>1</sup>H NMR (400 MHz, CDCl<sub>3</sub>): δ 7.92 – 7.81 (m, 2H), 7.57 (d,  $J$  = 7.9 Hz, 1H), 7.43 – 7.29 (m, 3H), 7.21 (t,  $J$  = 8.6 Hz, 2H), 6.67 (s, 1H), 2.55 (s, 3H); <sup>13</sup>C

**NMR** (125 MHz, CDCl<sub>3</sub>):  $\delta$  168.58, 163.76 (d,  $J_{C-F}$  = 251.1 Hz), 163.72, 164.76, 162.76, 136.92, 131.10, 129.57, 129.43, 128.73, 127.92 (d,  $J_{C-F}$  = 8.6 Hz), 126.04, 123.88 (d,  $J_{C-F}$  = 3.4 Hz), 116.25 (d,  $J_{C-F}$  = 22.2 Hz), 99.98, 21.12; **ESI-HRMS**: Calculated for C<sub>16</sub>H<sub>13</sub>FNO<sup>+</sup> [M+H]<sup>+</sup> 254.0976, found 254.0948.

### 3-(4-methoxyphenyl)-5-pentylisoxazole (1s):<sup>2,6</sup>

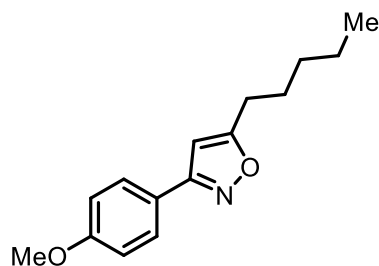

Prepared according to the general procedure and the title compound was isolated in 48% (412 mg) yield. Physical appearance: Yellow gel; TLC  $R_f$  0.3 (9:1, Petroleum ether: EtOAc); **<sup>1</sup>H NMR** (400 MHz, CDCl<sub>3</sub>):  $\delta$  7.75 (d,  $J$  = 8.8 Hz, 2H), 6.98 (d,  $J$  = 8.8 Hz, 2H), 6.24 (s, 1H), 3.87 (s, 3H), 2.79 (t,  $J$  = 7.6 Hz, 2H), 1.81 – 1.68 (m, 2H), 1.45 – 1.34 (m, 4H), 1.01 – 0.88 (m, 3H); **<sup>13</sup>C NMR** (176 MHz, CDCl<sub>3</sub>):  $\delta$  174.04, 161.92, 160.80, 128.11, 121.98, 114.22, 98.53, 55.34, 31.26, 27.25, 26.77, 22.33, 13.94; **ESI-HRMS**: Calculated for C<sub>15</sub>H<sub>20</sub>N<sub>2</sub>O<sup>+</sup> [M+H]<sup>+</sup> 246.1489, found 246.1459.

### (Z)-3-amino-1,3-diphenylprop-2-en-1-one (1a'):<sup>2</sup>

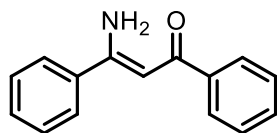

Prepared according to the reported literature procedure and the title compound was isolated in 73% yield. Spectral data obtained were in good agreement with those reported in the literature.

## 2.2 General procedure for the preparation of tosylhydrazone derivatives:

Tosylhydrazide (1.0 equiv, 10.75 mmol) was dissolved in methanol (20 mL). To this rapidly stirring solution was added the acetophenone (1.0 equiv, 10.75 mmol) dropwise. (Solid reagents were added portion wise). A mildly exothermic reaction ensued and the tosylhydrazide dissolved. A reflux condenser was fitted on the flask and the reaction mixture was heated to 70 °C. After 3h the reaction was found to be complete and the solvent was removed under reduced pressure. The concentrated mixture was then poured into a separatory funnel. The organic phase was diluted with EtOAc and washed with brine. It was then dried over anhydrous Na<sub>2</sub>SO<sub>4</sub>, filtered and concentrated under reduced pressure to get almost pure tosylhydrazone which was used as such without any purification.<sup>14</sup>

## 2.3 General procedure for the synthesis of pyrroles

In a pressure tube equipped with a stir bar, isoxazole (1.0 equiv, 0.15 mmol) was dissolved in dry dichloroethane (2.0 mL) and tosylhydrazone (1.2 equiv, 0.18 mmol) was added. The reaction mixture was stirred for 10 min followed by the addition of the  $[\text{RuCl}_2(p\text{-cym})]_2$  (0.05 equiv, 0.0075 mmol),  $\text{AgSbF}_6$  (0.20 equiv, 0.03 mmol) and  $\text{Cu}(\text{OAc})_2 \cdot \text{H}_2\text{O}$  (1.5 equiv, 0.225 mmol). The tube was fitted with a Teflon screw cap under an argon flow and the reaction mixture was heated to 120 °C and allowed to stir for 16-26 h. Upon cooling to room temperature, the reaction mixture was diluted with ethyl acetate and filtered through a pad of Celite. The filtrate was washed with saturated solution of  $\text{NaHCO}_3$  and brine. The organic extract was dried over anhydrous  $\text{Na}_2\text{SO}_4$ , filtered and concentrated under reduced pressure. The crude product was purified by a silica gel flash column chromatography to result in the desired product.

### (2.3) Mechanistic Studies

#### (a) Radical trap experiments:

**Procedure:** In a pressure tube equipped with a stir bar, 3, 5-diarylisoxazole (1.0 equiv, 0.15 mmol) was dissolved in dry dichloroethane (2.0 mL) and tosylhydrazone (1.2 equiv, 0.18 mmol) was added. The reaction mixture was stirred for 10–15 min followed by the addition of  $[\text{RuCl}_2(p\text{-cym})]_2$  (0.05 equiv, 0.0075 mmol),  $\text{AgSbF}_6$  (0.20 equiv, 0.03 mmol),  $\text{Cu}(\text{OAc})_2 \cdot \text{H}_2\text{O}$  (1.5 equiv, 0.225 mmol) and radical trap agent (2.0 equiv). The tube was fitted with a Teflon screw cap under an argon flow, and the reaction mixture was heated to 120 °C and allowed to stir for 24h. Upon cooling to room temperature, the reaction mixture was diluted with ethylacetate and filtered through a pad of Celite. The filtrate was washed with saturated solution of  $\text{NaHCO}_3$  and brine. The organic extract was dried over anhydrous  $\text{Na}_2\text{SO}_4$ , filtered and concentrated under reduced pressure. The crude product was purified by a silica gel flash column chromatography to yield the desired product.

Optimization studies for one pot synthesis of polysubstituted pyrroles:

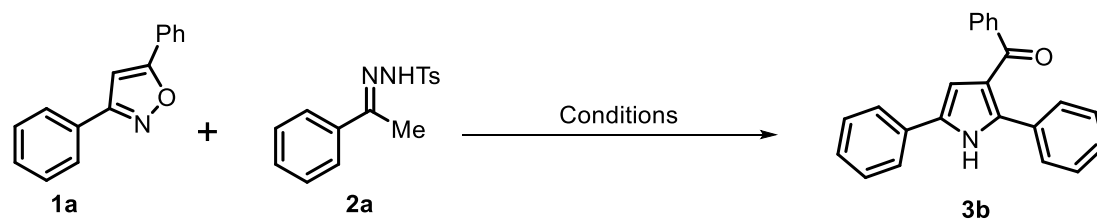

Table-S1

| Entry | Conditions                                                                                                                                                                     | Yield (%) <sup>a</sup> |
|-------|--------------------------------------------------------------------------------------------------------------------------------------------------------------------------------|------------------------|
| 1     | Cu(OAc) <sub>2</sub> (10 mol%), DCE, 120 °C, 24 h                                                                                                                              | 0                      |
| 2     | Cu(OAc) <sub>2</sub> .H <sub>2</sub> O (2 equiv.), DCE, 120 °C, 24 h                                                                                                           | trace                  |
| 3     | Cu(OTf) <sub>2</sub> (2 equiv.), DCE, 120 °C, 24 h                                                                                                                             | 0                      |
| 4     | Cu(OAc) <sub>2</sub> .H <sub>2</sub> O (1.5 equiv.), Ag <sub>2</sub> CO <sub>3</sub> (1 equiv.), DCE, 120 °C, 24 h                                                             | 30                     |
| 5     | Cu(OAc) <sub>2</sub> .H <sub>2</sub> O (1.5 equiv.), Ag <sub>2</sub> CO <sub>3</sub> (1 equiv.), THF, 120 °C, 24 h                                                             | 0                      |
| 6     | Cu(OAc) <sub>2</sub> .H <sub>2</sub> O (1.5 equiv.), Ag <sub>2</sub> CO <sub>3</sub> (1 equiv.), Toluene, 120 °C, 24 h                                                         | 0                      |
| 7     | Co(OAc) <sub>2</sub> .H <sub>2</sub> O (1.5 equiv.), Ag <sub>2</sub> CO <sub>3</sub> (1 equiv.), DCE, 120 °C, 24 h                                                             | 0                      |
| 8     | Cu(OAc) <sub>2</sub> .H <sub>2</sub> O (5 mol%), Ag <sub>2</sub> CO <sub>3</sub> (1 equiv.), DCE, 120 °C, 24 h                                                                 | 0                      |
| 9     | Sc(OTf) <sub>3</sub> (10 mol%), Cu(OAc) <sub>2</sub> .H <sub>2</sub> O (1.5 equiv.), Ag <sub>2</sub> CO <sub>3</sub> (1equiv.), DCE, 120 °C, 24 h                              | trace                  |
| 10    | RuCl <sub>3</sub> (10 mol%), Cu(OAc) <sub>2</sub> .H <sub>2</sub> O (1.5 equiv.), Ag <sub>2</sub> CO <sub>3</sub> (1 equiv.), DCE, 120 °C, 24 h                                | 35                     |
| 11    | Ph <sub>3</sub> PAuNTf <sub>2</sub> (20 mol%), Cu(OAc) <sub>2</sub> .H <sub>2</sub> O (1.5 equiv.), Ag <sub>2</sub> CO <sub>3</sub> (1 equiv.), DCE, 120 °C, 24 h              | trace                  |
| 12    | [RuCl <sub>2</sub> ( <i>p</i> -cym)] <sub>2</sub> (5 mol%), AgSbF <sub>6</sub> (20 mol%), Cu(OAc) <sub>2</sub> .H <sub>2</sub> O (1.5 equiv.), DCE, 120 °C, 24 h               | 47                     |
| 13    | [RuCl <sub>2</sub> ( <i>p</i> -cym)] <sub>2</sub> (5 mol%), AgSbF <sub>6</sub> (20 mol%), Cu(OAc) <sub>2</sub> .H <sub>2</sub> O (1.5 equiv.), THF, 120 °C, 24 h               | trace                  |
| 14    | [RuCl <sub>2</sub> ( <i>p</i> -cym)] <sub>2</sub> (5 mol%), AgSbF <sub>6</sub> (20 mol%), Cu(OAc) <sub>2</sub> .H <sub>2</sub> O (1.5 equiv.), Toluene, 120 °C, 24 h           | 40                     |
| 15    | [RuCl <sub>2</sub> ( <i>p</i> -cym)] <sub>2</sub> (5 mol%), AgSbF <sub>6</sub> (20 mol%), Cu(OAc) <sub>2</sub> .H <sub>2</sub> O (1.5 equiv.), Dioxane, 120 °C, 24 h           | 0                      |
| 16    | [RuCl <sub>2</sub> ( <i>p</i> -cym)] <sub>2</sub> (5 mol%), AgSbF <sub>6</sub> (20 mol%), Cu(OAc) <sub>2</sub> .H <sub>2</sub> O (1.5 equiv.), Methanol, 80 °C, 24 h           | 0                      |
| 17    | [RuCl <sub>2</sub> ( <i>p</i> -cym)] <sub>2</sub> (5 mol%), AgSbF <sub>6</sub> (20 mol%), Cu(OAc) <sub>2</sub> .H <sub>2</sub> O (1.5 equiv.), DCE:Toluene (1:1), 120 °C, 24 h | 42                     |
| 18    | <b>[RuCl<sub>2</sub>(<i>p</i>-cym)]<sub>2</sub> (5 mol%), AgSbF<sub>6</sub> (20 mol%), Cu(OAc)<sub>2</sub>.H<sub>2</sub>O (1.5 equiv.), DCE, 120 °C, 24 h</b>                  | <b>65</b>              |
| 19    | [RuCl <sub>2</sub> ( <i>p</i> -cym)] <sub>2</sub> (5 mol%), AgSbF <sub>6</sub> (20 mol%), DCE, 120 °C, 24 h                                                                    | trace                  |
| 20    | AgSbF <sub>6</sub> (20 mol%), Cu(OAc) <sub>2</sub> .H <sub>2</sub> O (1.5 equiv.) DCE, 120 °C, 24 h                                                                            | trace                  |
| 21    | [RuCl <sub>2</sub> ( <i>p</i> -cym)] <sub>2</sub> (5 mol%), AgSbF <sub>6</sub> (20 mol%), CuI (1 equiv.), DCE, 120 °C, 24 h                                                    | 0                      |
| 22    | [RuCl <sub>2</sub> ( <i>p</i> -cym)] <sub>2</sub> (5 mol%), AgSbF <sub>6</sub> (20 mol%), Cu(OAc) <sub>2</sub> .H <sub>2</sub> O (1.5 equiv.), DCE, r.t., 24 h                 | 0                      |

<sup>a</sup>Isolated yield.

## (A) Analytical Data:

### (2-(4-methoxyphenyl)-5-phenyl-1H-pyrrol-3-yl)(phenyl)methanone (3a):

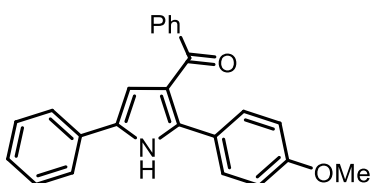

Yield: 72 % (38 mg); Physical appearance: Yellow solid; M.p. 130–132 °C; TLC  $R_f$  0.2 (4:1, Petroleum ether: EtOAc);  $^1\text{H}$  NMR (400 MHz,  $\text{CDCl}_3$ ):  $\delta$  8.67 (s, 1H), 7.82 (d,  $J = 7.6$  Hz, 2H), 7.57 – 7.29 (m, 10H), 6.91 – 6.80 (m, 3H), 3.81 (s, 3H);  $^{13}\text{C}$  NMR (100 MHz,  $\text{CDCl}_3$ ):  $\delta$  192.27, 159.63, 139.61, 138.03, 131.61, 131.50, 131.32, 129.83, 129.64, 129.06, 127.92, 127.04, 124.32, 124.02, 121.38, 113.90, 110.46, 55.32; **ESI-HRMS**: Calculated for  $\text{C}_{24}\text{H}_{20}\text{NO}_2^+$   $[\text{M}+\text{H}]^+$  354.1489, found 354.1507.

### (2,5-diphenyl-1H-pyrrol-3-yl)(phenyl)methanone (3b):<sup>7</sup>

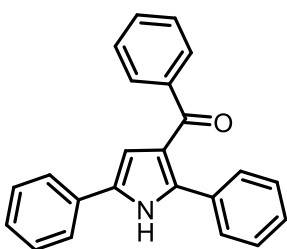

Yield: 70 % (34 mg); Physical appearance: Pale yellow solid; M.p. 140–142 °C; TLC  $R_f$  0.3 (4:1, Petroleum ether: EtOAc);  $^1\text{H}$  NMR (400 MHz,  $\text{CDCl}_3$ ):  $\delta$  8.92 (s, 1H), 7.87 – 7.80 (m, 2H), 7.59 – 7.54 (m, 2H), 7.51 – 7.39 (m, 5H), 7.38 – 7.26 (m, 6H), 6.88 (d,  $J = 2.8$  Hz, 1H),  $^{13}\text{C}$  NMR (125 MHz,  $\text{CDCl}_3$ ):  $\delta$  192.35, 139.40, 137.77, 131.84, 131.79, 131.72, 131.41, 129.68, 129.09, 128.53, 128.45, 128.18, 127.91, 127.19, 124.11, 122.01, 110.50; **ESI-HRMS**: Calculated for  $\text{C}_{23}\text{H}_{18}\text{NO}^+$   $[\text{M}+\text{H}]^+$  324.1383, found 324.1361.

### Phenyl(5-phenyl-2-(p-tolyl)-1H-pyrrol-3-yl)methanone (3c):

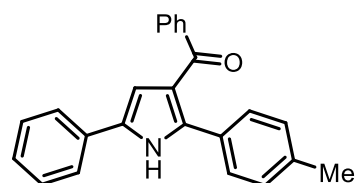

Yield: 65% (33 mg); Physical appearance: Yellow solid; M.p. 115–117 °C; TLC  $R_f$  0.3 (4:1, Petroleum ether: EtOAc);  $^1\text{H}$  NMR (400 MHz,  $\text{CDCl}_3$ ):  $\delta$  8.67 (s, 1H), 7.80 (d,  $J = 7.7$  Hz, 2H), 7.50 (d,  $J = 7.7$  Hz, 2H), 7.44 – 7.29 (m, 7H), 7.27 – 7.23 (m, 1H), 7.09 (d,  $J = 7.8$  Hz, 2H), 6.81 (d,  $J = 2.8$  Hz, 1H), 2.30 (s, 3H);  $^{13}\text{C}$  NMR (125 MHz,  $\text{CDCl}_3$ ):  $\delta$  192.25, 139.53, 138.22, 138.00, 136.60, 131.64, 131.47, 129.66, 129.17, 129.08, 128.91, 128.29, 127.92, 127.11, 124.04, 121.68, 110.51, 21.28; **ESI-HRMS**: Calculated for  $\text{C}_{24}\text{H}_{20}\text{NO}^+$   $[\text{M}+\text{H}]^+$  338.1539, found 338.1521.

### (2-([1,1'-biphenyl]-4-yl)-5-phenyl-1H-pyrrol-3-yl)(phenyl)methanone (3d):

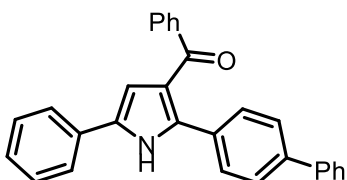

Yield: 52% (31 mg); Physical appearance: Yellow solid; M.p. 192–194 °C TLC  $R_f$  0.3 (3:1, Petroleum ether: EtOAc);  $^1\text{H}$

**NMR** (400 MHz, CDCl<sub>3</sub>):  $\delta$  8.82 (s, 1H), 7.88 (d,  $J$  = 7.4 Hz, 2H), 7.65 – 7.54 (m, 8H), 7.52 – 7.36 (m, 8H), 7.32 (t,  $J$  = 7.4 Hz, 1H), 6.90 (d,  $J$  = 2.8 Hz, 1H); **<sup>13</sup>C NMR** (125 MHz, CDCl<sub>3</sub>):  $\delta$  192.44, 140.78, 140.41, 139.46, 137.50, 131.93, 131.78, 131.39, 130.62, 129.73, 129.07, 128.80, 128.76, 127.98, 127.49, 127.18, 127.05, 126.99, 124.15, 122.03, 110.72; **ESI-HRMS**: Calculated for C<sub>29</sub>H<sub>12</sub>NO<sup>+</sup> [M+H]<sup>+</sup> 400.1696, found 400.1697.

**(2-(4-fluorophenyl)-5-phenyl-1H-pyrrol-3-yl)(phenyl)methanone (3e):**

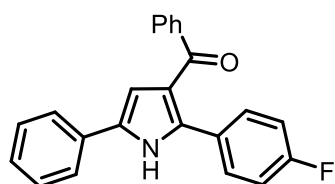

Yield: 48% (25 mg); Physical appearance: White solid; M.p. 156–158 °C; TLC  $R_f$  0.3 (4:1, Petroleum ether: EtOAc); **<sup>1</sup>H NMR** (400 MHz, CDCl<sub>3</sub>):  $\delta$  8.88 (s, 1H), 7.78 (d,  $J$  = 7.7 Hz, 2H), 7.51 (d,  $J$  = 7.7 Hz, 2H), 7.47 – 7.30 (m, 7H), 7.27 (d,  $J$  = 7.6 Hz, 1H), 6.93 (t,  $J$  = 8.6 Hz, 2H), 6.80 (d,  $J$  = 2.8 Hz, 1H); **<sup>13</sup>C NMR** (125 MHz, CDCl<sub>3</sub>):  $\delta$  192.32, 162.57 (d,  $J$  = 248.6 Hz), 139.36, 136.87, 131.88, 131.83, 131.30, 130.35 (d,  $J$  = 8.2 Hz), 129.63, 129.08, 127.99, 127.93 (d,  $J$  = 3.5 Hz), 127.25, 124.15, 121.91, 115.42 (d,  $J$  = 21.8 Hz), 110.48; **<sup>19</sup>F NMR** (376 MHz, CDCl<sub>3</sub>):  $\delta$  -112.91; **ESI-HRMS**: Calculated for C<sub>23</sub>H<sub>16</sub>FNNaO<sup>+</sup> [M+Na]<sup>+</sup> 364.1108, found 364.1114.

**(2-(2-methoxyphenyl)-5-phenyl-1H-pyrrol-3-yl)(phenyl)methanone (3f):**

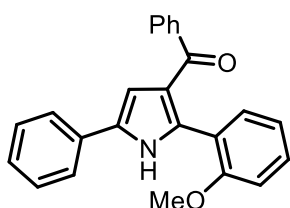

Yield: 53% (28 mg); Physical appearance: Yellow solid; M.p. 120–122 °C; TLC  $R_f$  0.3 (3:1, Petroleum ether: EtOAc); **<sup>1</sup>H NMR** (400 MHz CDCl<sub>3</sub>):  $\delta$  9.38 (s, 1H), 7.88 – 7.81 (m, 2H), 7.58 – 7.53 (m, 2H), 7.46 – 7.41 (m, 4H), 7.36 – 7.28 (m, 3H), 7.26 – 7.21 (m, 1H), 6.92 – 6.84 (m, 3H), 3.83 (s, 3H); **<sup>13</sup>C NMR** (125 MHz, CDCl<sub>3</sub>):  $\delta$  192.76, 155.93, 139.40, 133.47, 131.73, 131.60, 131.28, 129.60, 129.39, 129.34, 129.03, 127.74, 126.93, 124.00, 123.05, 120.80, 120.17, 111.07, 109.77, 55.60; **ESI-HRMS**: Calculated for C<sub>24</sub>H<sub>19</sub>NNaO<sub>2</sub><sup>+</sup> [M+Na]<sup>+</sup> 376.1308, found 376.1314.

**(2-(2-fluorophenyl)-5-phenyl-1H-pyrrol-3-yl)(phenyl)methanone (3g):**

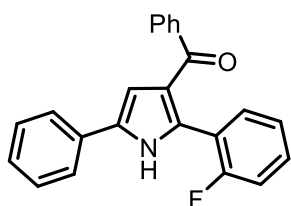

Yield: 46% (24 mg); Physical appearance: Yellow solid; M.p. 142–144 °C TLC  $R_f$  0.3 (4:1, Petroleum ether: EtOAc); **<sup>1</sup>H NMR** (400 MHz, CDCl<sub>3</sub>):  $\delta$  9.08 (s, 1H), 7.89 – 7.83 (m, 2H), 7.60 – 7.54 (m, 2H), 7.52 – 7.35 (m, 6H), 7.34 – 7.22 (m, 2H), 7.13 – 7.02 (m, 2H), 6.89 (d,  $J$  = 2.9 Hz, 1H); **<sup>13</sup>C NMR** (125 MHz, CDCl<sub>3</sub>):  $\delta$  192.35, 159.32 (d,  $J$  = 247.3 Hz), 139.20, 132.30, 131.86, 131.36, 131.32 (d,  $J$  = 3.2 Hz), 130.61, 129.85 (d,  $J$  = 8.3 Hz),

129.64, 129.09, 127.95, 127.31, 124.20, 124.15 (d,  $J = 3.5$  Hz), 123.56, 119.47 (d,  $J = 12.8$  Hz), 115.82 (d,  $J = 22.4$  Hz), 110.04;  $^{19}\text{F}$  NMR (376 MHz,  $\text{CDCl}_3$ ):  $\delta$  -115.31; **ESI-HRMS**: Calculated for  $\text{C}_{23}\text{H}_{17}\text{FNO}^+$   $[\text{M}+\text{H}]^+$  342.1289, found 342.1271.

**(2-(naphthalen-1-yl)-5-phenyl-1H-pyrrol-3-yl)(phenyl)methanone (3h):**

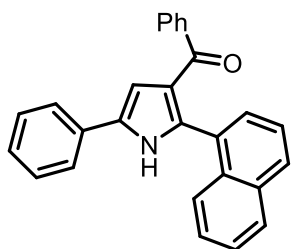

Yield: 56% (31 mg); Physical appearance: Yellow solid; M.p. 146–148 °C TLC  $R_f$  0.3 (4:1, Petroleum ether: EtOAc);  $^1\text{H}$  NMR (400 MHz,  $\text{CDCl}_3$ ):  $\delta$  8.83 (s, 1H), 7.96 – 7.89 (m, 1H), 7.88 – 7.75 (m, 2H), 7.70 – 7.62 (m, 2H), 7.61 – 7.55 (m, 2H), 7.54 – 7.36 (m, 6H), 7.35 – 7.27 (m, 2H), 7.17 – 7.05 (m, 3H);  $^{13}\text{C}$  NMR (125 MHz,  $\text{CDCl}_3$ ):  $\delta$  192.10, 139.40, 136.28, 133.47, 132.13, 132.11, 131.45, 131.21, 129.95, 129.11, 129.02, 128.99, 128.64, 128.33, 127.43, 127.17, 126.72, 125.98, 125.28, 124.96, 124.19, 124.09, 109.22; **ESI-HRMS**: Calculated for  $\text{C}_{27}\text{H}_{19}\text{NNaO}^+$   $[\text{M}+\text{Na}]^+$  396.1359, found 396.1334.

**(2-(3-methoxyphenyl)-5-phenyl-1H-pyrrol-3-yl)(phenyl)methanone (3i):**

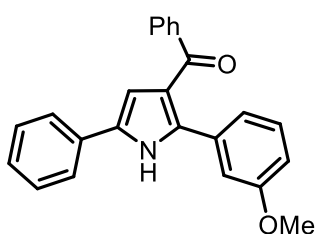

Yield: 57% (30 mg); Physical appearance: Red solid; M.p. 110–112 °C TLC  $R_f$  0.3 (3:1, Petroleum ether: EtOAc);  $^1\text{H}$  NMR (400 MHz,  $\text{CDCl}_3$ ):  $\delta$  8.88 (s, 1H), 7.85 – 7.81 (m, 2H), 7.59 – 7.54 (m, 2H), 7.49 – 7.40 (m, 3H), 7.38 – 7.29 (m, 3H), 7.22 (t,  $J = 7.9$  Hz, 1H), 7.08 (d,  $J = 7.7$  Hz, 1H), 7.02 (s, 1H), 6.89 (d,  $J = 2.9$  Hz, 1H), 6.82 (dd,  $J = 8.2, 1.7$  Hz, 1H), 3.74 (s, 3H);  $^{13}\text{C}$  NMR (125 MHz,  $\text{CDCl}_3$ ):  $\delta$  192.43, 159.44, 139.41, 137.44, 133.04, 131.89, 131.76, 131.38, 129.67, 129.49, 129.08, 127.91, 127.20, 124.13, 122.16, 120.59, 114.22, 114.00, 110.49, 55.29; **ESI-HRMS**: Calculated for  $\text{C}_{24}\text{H}_{20}\text{NO}_2^+$   $[\text{M}+\text{H}]^+$  354.1489, found 354.1463.

**Phenyl(5-phenyl-2-(m-tolyl)-1H-pyrrol-3-yl)methanone (3j):**

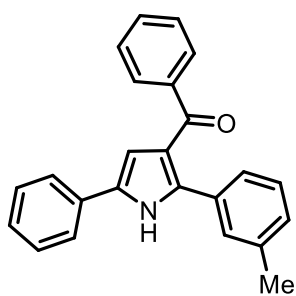

Yield: 55% (28 mg); Physical appearance: Yellow gell; TLC  $R_f$  0.3 (4:1, Petroleum ether: EtOAc);  $^1\text{H}$  NMR (400 MHz,  $\text{CDCl}_3$ ):  $\delta$  8.76 (s, 1H), 7.83 (d,  $J = 7.2$  Hz, 2H), 7.57 (d,  $J = 7.5$  Hz, 2H), 7.49 – 7.40 (m, 3H), 7.39 – 7.29 (m, 5H), 7.22 (t,  $J = 7.6$  Hz, 1H), 7.10 (d,  $J = 7.7$  Hz, 1H), 6.90 (d,  $J = 2.9$  Hz, 1H), 2.31 (s, 3H);  $^{13}\text{C}$  NMR (126 MHz,  $\text{CDCl}_3$ ):  $\delta$  192.39, 139.52, 138.10, 138.00, 131.70, 131.66, 131.63, 131.45, 129.60, 129.21, 129.08, 128.97, 128.36, 127.86, 127.15, 125.47,

124.07, 121.99, 110.44, 21.31; **ESI-HRMS**: Calculated for  $C_{24}H_{20}NO^+$   $[M+H]^+$  338.1539, found 338.1542.

**Phenyl(5-phenyl-2-(3-(trifluoromethyl)phenyl)-1H-pyrrol-3-yl)methanone (3k):**

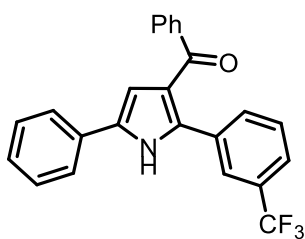

Yield: 49% (29 mg); Physical appearance: Yellow solid; M.p. 175–177 °C TLC  $R_f$  0.3 (3:1, Petroleum ether: EtOAc);  **$^1H$  NMR** (400 MHz,  $CDCl_3$ ):  $\delta$  8.93 (s, 1H), 7.86 – 7.79 (m, 2H), 7.76 – 7.70 (m, 2H), 7.62 – 7.56 (m, 2H), 7.55 – 7.50 (m, 1H), 7.49 – 7.30 (m, 7H), 6.90 (d,  $J = 2.8$  Hz, 1H);  **$^{13}C$  NMR** (126 MHz,  $CDCl_3$ ):  $\delta$  192.22, 139.17, 135.83, 132.61, 132.51, 131.99, 131.95, 131.09, 130.97, 130.71, 129.60, 129.13, 128.88, 128.03, 127.50, 125.00 (q,  $J = 3.5$  Hz), 124.71 (q,  $J = 3.4$  Hz), 124.29, 122.71, 110.72;  **$^{19}F$  NMR** (376 MHz,  $CDCl_3$ ):  $\delta$  -62.67; **ESI-HRMS**: Calculated for  $C_{24}H_{16}F_3NNaO^+$   $[M+Na]^+$  414.1076, found 414.1090.

**(2-(3,4-dimethylphenyl)-5-phenyl-1H-pyrrol-3-yl)(phenyl)methanone (3l):**

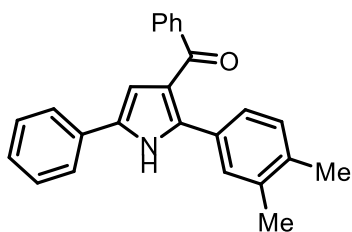

Yield: 58% (31 mg); Physical appearance: Yellow solid; M.p. 183–185 °C TLC  $R_f$  0.3 (4:1, Petroleum ether: EtOAc);  **$^1H$  NMR** (400 MHz,  $CDCl_3$ ):  $\delta$  8.80 (s, 1H), 7.84 (d,  $J = 7.9$  Hz, 2H), 7.61 – 7.52 (m, 2H), 7.51 – 7.34 (m, 5H), 7.33 – 7.21 (m, 3H), 7.11 – 7.03 (m, 1H), 6.89 – 6.83 (m, 1H), 2.24 (s, 3H) 2.21 (s, 3H);  **$^{13}C$  NMR** (126 MHz,  $CDCl_3$ ):  $\delta$  192.36, 139.68, 138.34, 136.83, 136.61, 131.53, 131.40, 129.68, 129.61, 129.24, 129.03, 127.87, 127.00, 125.81, 124.03, 121.57, 110.44, 19.67, 19.56; **ESI-HRMS**: Calculated for  $C_{25}H_{22}NO^+$   $[M+H]^+$  352.0696, found 352.1697.

**(2-cyclohexyl-5-phenyl-1H-pyrrol-3-yl)(phenyl)methanone (3m):**

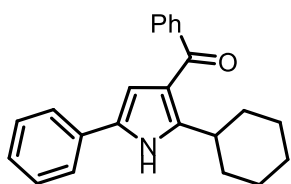

Yield: 50% (25 mg); Physical appearance: Pale Yellow solid; M.p. 174–176 °C TLC  $R_f$  0.3 (3:1, Petroleum ether: EtOAc);  **$^1H$  NMR** (400 MHz,  $CDCl_3$ ):  $\delta$  8.60 (s, 1H), 7.87 (d,  $J = 7.2$  Hz, 2H), 7.59 – 7.53 (m, 1H), 7.52 – 7.45 (m, 4H), 7.43 – 7.37 (m, 2H), 7.28 – 7.23 (m, 1H), 6.66 (d,  $J = 2.7$  Hz, 1H), 3.61 – 3.48 (m, 1H), 2.21 – 2.10 (m, 2H), 1.93 – 1.77 (m, 3H), 1.55 – 1.38 (m, 4H), 1.37 – 1.26 (m, 1H);  **$^{13}C$  NMR** (126 MHz,  $CDCl_3$ ):  $\delta$  192.32, 146.71, 140.73, 131.81, 131.20, 129.30, 129.10, 129.00, 128.04, 126.73, 123.82, 119.87,



109.54, 36.18, 32.71, 26.49, 26.15; **ESI-HRMS**: Calculated for  $C_{23}H_{23}NNaO^+$   $[M+Na]^+$  352.1672, found 352.1670.

**(2-isopropyl-5-phenyl-1H-pyrrol-3-yl)(phenyl)methanone (3n):**

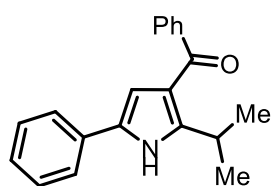

Yield: 52% (22 mg); Physical appearance: Light yellow solid; M.p. 152–154 °C TLC  $R_f$  0.3 (3:1, Petroleum ether: EtOAc);  **$^1H$  NMR** (400 MHz,  $CDCl_3$ ):  $\delta$  8.62 (s, 1H), 7.89 – 7.84 (m, 2H), 7.58 – 7.53 (m, 1H), 7.52 – 7.46 (m, 4H), 7.40 (t,  $J = 7.6$  Hz, 2H), 7.28 – 7.23 (m, 1H), 6.66 (d,  $J = 2.7$  Hz, 1H), 3.91 (sept,  $J = 7.0$  Hz, 1H), 1.41 (d,  $J = 7.0$  Hz, 6H);  **$^{13}C$  NMR** (126 MHz,  $CDCl_3$ ):  $\delta$  192.26, 147.21, 140.73, 131.79, 131.20, 129.31, 129.09, 129.01, 128.05, 126.77, 123.85, 119.82, 109.67, 26.38, 22.05; **ESI-HRMS**: Calculated for  $C_{20}H_{20}NO^+$   $[M+H]^+$  290.1539, found 290.1552.

**(2-ethyl-5-phenyl-1H-pyrrol-3-yl)(phenyl)methanone (3o):**

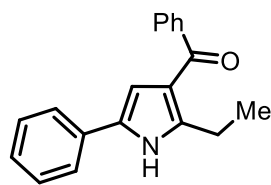

Yield: 49% (20 mg); Physical appearance: Brown solid; M.p. 137–139 °C TLC  $R_f$  0.3 (3:1, Petroleum ether: EtOAc);  **$^1H$  NMR** (400 MHz,  $CDCl_3$ ):  $\delta$  8.65 (s, 1H), 7.91 – 7.83 (m, 2H), 7.59 – 7.53 (m, 1H), 7.52 – 7.46 (m, 4H), 7.43 – 7.37 (m, 2H), 7.28 – 7.23 (m, 1H), 6.69 (d,  $J = 2.8$  Hz, 1H), 3.12 (q,  $J = 7.6$  Hz, 2H), 1.38 (t,  $J = 7.6$  Hz, 3H);  **$^{13}C$  NMR** (126 MHz,  $CDCl_3$ ):  $\delta$  192.25, 143.30, 140.58, 131.74, 131.22, 129.57, 129.06, 129.00, 128.08, 126.74, 123.81, 120.44, 109.46, 21.13, 13.45; **ESI-HRMS**: Calculated for  $C_{19}H_{18}NO^+$   $[M+H]^+$  276.1383, found 276.1403.

**(5-(4-fluorophenyl)-2-phenyl-1H-pyrrol-3-yl)(phenyl)methanone (3p):**

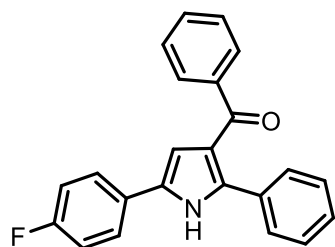

Yield: 58% (30 mg); Physical appearance: Pale yellow solid; M.p. 167–169 °C; TLC  $R_f$  0.3 (3:1, Petroleum ether: EtOAc);  **$^1H$  NMR** (400 MHz,  $CDCl_3$ ):  $\delta$  8.84 (s, 1H), 7.84 – 7.79 (m, 2H), 7.56 – 7.43 (m, 5H), 7.38 – 7.25 (m, 5H), 7.12 (t,  $J = 8.6$  Hz, 2H), 6.80 (d,  $J = 2.9$  Hz, 1H);  **$^{13}C$  NMR** (125 MHz,  $CDCl_3$ ):  $\delta$  192.40, 162.02 (d,  $J = 246.9$  Hz), 139.30, 137.84, 131.77, 131.67, 131.08, 129.67, 128.44, 128.42, 128.19, 127.92, 127.81 (d,  $J = 3.2$  Hz), 125.91 (d,  $J = 8.0$  Hz), 121.99, 116.08 (d,  $J = 21.8$  Hz), 110.32;  **$^{19}F$  NMR** (376 MHz,  $CDCl_3$ ):  $\delta$  -114.59; **ESI-HRMS**: Calculated for  $C_{23}H_{17}FNO^+$   $[M+H]^+$  342.1289, found 342.1273.

**(5-(4-fluorophenyl)-2-(p-tolyl)-1H-pyrrol-3-yl)(phenyl)methanone (3q):**

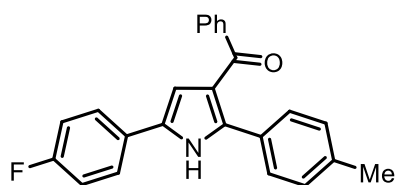

Yield: 60% (32 mg); Physical appearance: Orange solid; M.p. 140–142 °C; TLC  $R_f$  0.3 (3:1, Petroleum ether: EtOAc);  $^1\text{H NMR}$  (400 MHz,  $\text{CDCl}_3$ ):  $\delta$  8.82 (s, 1H), 7.86 – 7.80 (m, 2H), 7.54 – 7.44 (m, 3H), 7.40 – 7.33 (m, 4H), 7.14 – 7.07 (m, 4H), 6.77 (d,  $J = 2.9$  Hz, 1H), 2.32 (s, 3H);  $^{13}\text{C NMR}$  (125 MHz,  $\text{CDCl}_3$ ):  $\delta$  192.36, 161.94 (d,  $J = 246.9$  Hz), 139.44, 138.16, 131.69, 130.74, 129.66, 129.10, 128.77, 128.29, 127.92, 127.90, 127.89 (d,  $J = 3.3$  Hz), 125.84 (d,  $J = 7.9$  Hz), 121.61, 116.02 (d,  $J = 21.8$  Hz), 110.31, 21.26;  $^{19}\text{F NMR}$  (376 MHz,  $\text{CDCl}_3$ ):  $\delta$  -114.78; **ESI-HRMS**: Calculated for  $\text{C}_{24}\text{H}_{19}\text{FNO}^+$   $[\text{M}+\text{H}]^+$  356.1445, found 356.1446.

**(2,5-bis(4-fluorophenyl)-1H-pyrrol-3-yl)(phenyl)methanone (3r):**

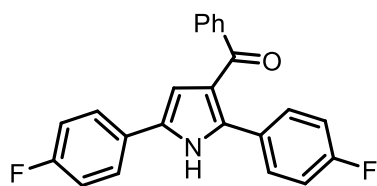

Yield: 50% (27 mg); Physical appearance: Yellow solid; M.p. 150–152 °C; TLC  $R_f$  0.3 (3:1, Petroleum ether: EtOAc);  $^1\text{H NMR}$  (400 MHz,  $\text{CDCl}_3$ ):  $\delta$  8.81 (s, 1H), 7.81 (d,  $J = 7.8$  Hz, 2H), 7.56 – 7.42 (m, 5H), 7.38 (t,  $J = 7.7$  Hz, 2H), 7.12 (t,  $J = 8.6$  Hz, 2H), 6.99 (t,  $J = 8.6$  Hz, 2H), 6.79 (d,  $J = 2.8$  Hz, 1H);  $^{13}\text{C NMR}$  (100 MHz,  $\text{CDCl}_3$ )  $\delta$  192.32, 163.27 (d,  $J = 51.6$  Hz), 161.07 (d,  $J = 51.6$  Hz), 139.28, 136.91, 131.89, 131.10, 130.33 (d,  $J = 8.2$  Hz), 129.60, 128.01, 127.82 (d,  $J = 3.4$  Hz), 127.69 (d,  $J = 3.2$  Hz), 125.96 (d,  $J = 8.0$  Hz), 121.90, 116.07 (d,  $J = 21.8$  Hz), 115.41 (d,  $J = 21.9$  Hz), 110.30;  $^{19}\text{F NMR}$  (376 MHz,  $\text{CDCl}_3$ ):  $\delta$  -112.84, -114.46; **ESI-HRMS**: Calculated for  $\text{C}_{23}\text{H}_{15}\text{F}_2\text{NNaO}^+$   $[\text{M}+\text{Na}]^+$  382.1014, found 382.1019.

**(5-(3-nitrophenyl)-2-(p-tolyl)-1H-pyrrol-3-yl)(phenyl)methanone (3s):**

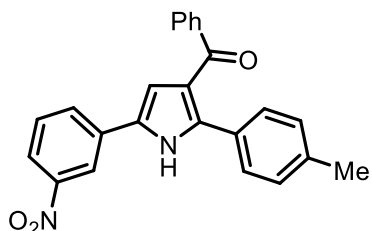

Yield: 56% (27 mg); Physical appearance: Yellow solid; M.p. 186–188 °C TLC  $R_f$  0.3 (7:3, Petroleum ether: EtOAc);  $^1\text{H NMR}$  (400 MHz,  $\text{CDCl}_3$ ):  $\delta$  9.06 (s, 1H), 8.37 (s, 1H), 8.10 (dd,  $J = 8.2, 2.0$  Hz, 1H), 7.90 – 7.80 (m, 3H), 7.57 (t,  $J = 8.0$  Hz, 1H), 7.50 (t,  $J = 7.4$  Hz, 1H), 7.42 – 7.36 (m, 4H), 7.10 (d,  $J = 7.9$  Hz, 2H), 6.96 (d,  $J = 2.8$  Hz, 1H), 2.32 (s, 3H);  $^{13}\text{C NMR}$  (125 MHz,  $\text{CDCl}_3$ ):  $\delta$  192.31, 148.82, 139.46, 139.12, 138.50, 133.20, 131.98, 129.97, 129.70, 129.68, 129.12, 129.10, 128.32, 128.25, 128.05, 121.89, 121.23, 118.36, 112.20, 21.26; **ESI-HRMS**: Calculated for  $\text{C}_{24}\text{H}_{19}\text{N}_2\text{O}_3^+$   $[\text{M}+\text{H}]^+$  383.1390, found 383.1403.

**(5-(3-nitrophenyl)-2-phenyl-1H-pyrrol-3-yl)(phenyl)methanone (3t):**

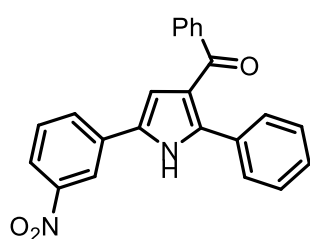

Yield: 40% (22 mg); Physical appearance: Yellow solid; M.p. 180–182 °C TLC  $R_f$  0.3 (7:3, Petroleum ether: EtOAc);  $^1\text{H NMR}$  (400 MHz,  $\text{CDCl}_3$ ):  $\delta$  9.20 (s, 1H), 8.38 (s, 1H), 8.11 (dd,  $J = 8.0$ , 2.1 Hz, 1H), 7.88 (d,  $J = 8.0$  Hz, 1H), 7.82 (d,  $J = 7.2$  Hz, 2H), 7.57 (t,  $J = 8.0$  Hz, 1H), 7.52 – 7.44 (m, 3H), 7.37 (t,  $J = 7.6$  Hz, 2H), 7.30 – 7.25 (m, 3H), 6.98 (d,  $J = 2.9$  Hz, 1H);  $^{13}\text{C NMR}$  (125 MHz,  $\text{CDCl}_3$ ):  $\delta$  192.29, 148.85, 139.12, 138.99, 133.13, 132.05, 131.17, 130.04, 129.79, 129.67, 129.42, 128.50, 128.46, 128.05, 122.29, 121.39, 118.42, 112.19; **ESI-HRMS**: Calculated for  $\text{C}_{23}\text{H}_{17}\text{N}_2\text{O}_3^+$   $[\text{M}+\text{H}]^+$  369.1234, found 369.1236.

**(5-(4-fluorophenyl)-2-(3-methoxyphenyl)-1H-pyrrol-3-yl)(phenyl)methanone (3u):**

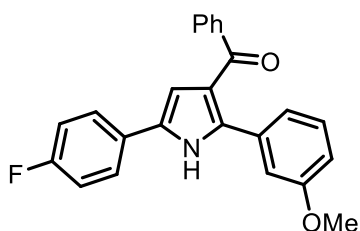

Yield: 56% (31 mg); Physical appearance: yellow solid; M.p. 145–147 °C; TLC  $R_f$  0.2 (3:1, Petroleum ether: EtOAc);  $^1\text{H NMR}$  (400 MHz,  $\text{CDCl}_3$ ):  $\delta$  8.79 (s, 1H), 7.81 (d,  $J = 7.7$  Hz, 2H), 7.56 – 7.50 (m, 2H), 7.46 (t,  $J = 7.5$  Hz, 1H), 7.34 (t,  $J = 7.6$  Hz, 2H), 7.22 (t,  $J = 7.9$  Hz, 1H), 7.13 (t,  $J = 8.6$  Hz, 2H), 7.06 (d,  $J = 7.7$  Hz, 1H), 7.00 (s, 1H), 6.80 (d,  $J = 2.6$  Hz, 2H), 3.73 (s, 3H);  $^{13}\text{C NMR}$  (125 MHz,  $\text{CDCl}_3$ ):  $\delta$  192.38, 162.04 (d,  $J = 247.1$  Hz), 159.45, 139.32, 137.44, 132.94, 131.80, 131.09, 129.65, 129.50, 127.92, 127.76 (d,  $J = 3.3$  Hz), 125.92 (d,  $J = 7.9$  Hz), 122.18, 120.55, 116.09 (d,  $J = 21.9$  Hz), 114.21, 114.01, 110.33, 55.28;  $^{19}\text{F NMR}$  (376 MHz,  $\text{CDCl}_3$ ):  $\delta$  -114.52; **ESI-HRMS**: Calculated for  $\text{C}_{24}\text{H}_{18}\text{FNNaO}_2^+$   $[\text{M}+\text{Na}]^+$  394.1214, found 394.1221.

**(5-(4-fluorophenyl)-2-(m-tolyl)-1H-pyrrol-3-yl)(phenyl)methanone (3v):**

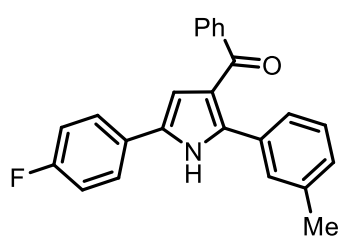

Yield: 52% (28 mg); Physical appearance: yellowish brown solid; M.p. 144–146 °C; TLC  $R_f$  0.3 (3:1, Petroleum ether: EtOAc);  $^1\text{H NMR}$  (400 MHz,  $\text{CDCl}_3$ ):  $\delta$  8.84 (s, 1H), 7.83 – 7.78 (m, 2H), 7.55 – 7.49 (m, 2H), 7.48 – 7.43 (m, 1H), 7.37 – 7.31 (m, 2H), 7.28 – 7.22 (m, 2H), 7.19 – 7.04 (m, 4H), 6.80 (d,  $J = 2.9$  Hz, 1H), 2.27 (s, 3H);  $^{13}\text{C NMR}$  (125 MHz,  $\text{CDCl}_3$ ):  $\delta$  192.47, 161.98 (d,  $J = 246.9$  Hz), 139.42, 138.13, 138.05, 131.68, 131.52, 130.95, 129.60, 129.21, 128.94, 128.31, 127.87, 127.85 (d,  $J = 3.6$  Hz), 125.88 (d,  $J = 7.8$  Hz), 125.48, 121.93, 116.04 (d,  $J = 21.9$  Hz),.

110.25, 21.28;  $^{19}\text{F}$  NMR (376 MHz,  $\text{CDCl}_3$ ):  $\delta$  -114.70; **ESI-HRMS**: Calculated for  $\text{C}_{24}\text{H}_{19}\text{FNO}^+$   $[\text{M}+\text{H}]^+$  356.1445, found 356.1429.

**(5-(2-chlorophenyl)-2-(m-tolyl)-1H-pyrrol-3-yl)(phenyl)methanone (3w):**

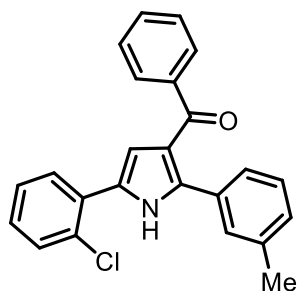

Yield: 46% (26 mg); Physical appearance: Pale yellow solid; M.p. 147–149 °C TLC  $R_f$  0.3 (3:1, Petroleum ether: EtOAc);  $^1\text{H}$  NMR (400 MHz,  $\text{CDCl}_3$ ):  $\delta$  9.35 (s, 1H), 7.87 – 7.81 (m, 2H), 7.63 (dd,  $J$  = 7.8, 1.7 Hz, 1H), 7.50 – 7.44 (m, 2H), 7.39 – 7.30 (m, 5H), 7.28 – 7.22 (m, 2H), 7.12 (d,  $J$  = 7.6 Hz, 1H), 6.97 (d,  $J$  = 2.9 Hz, 1H), 2.32 (s, 3H);  $^{13}\text{C}$  NMR (126 MHz,  $\text{CDCl}_3$ ):  $\delta$  192.24, 139.51, 138.17, 137.77, 131.67, 131.57, 130.86, 130.13, 129.83, 129.63, 129.49, 129.21, 129.06, 128.85, 128.42, 128.28, 127.89, 127.43, 125.41, 121.14, 114.02, 21.34; **ESI-HRMS**: Calculated for  $\text{C}_{24}\text{H}_{18}\text{ClNNaO}^+$   $[\text{M}+\text{Na}]^+$  394.0969, found 394.0993.

**(2,5-diphenyl-1H-pyrrol-3-yl)(p-tolyl)methanone (3x):**

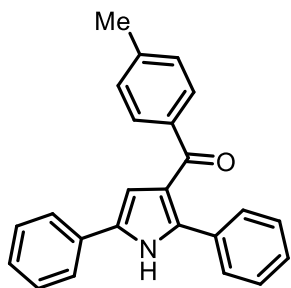

Yield: 75% (38 mg); Physical appearance: Brown solid; M.p. 162–164 °C TLC  $R_f$  0.3 (4:1, Petroleum ether: EtOAc);  $^1\text{H}$  NMR (400 MHz,  $\text{CDCl}_3$ ):  $\delta$  8.79 (s, 1H), 7.77 (d,  $J$  = 8.2 Hz, 2H), 7.59 – 7.50 (m, 4H), 7.46 – 7.40 (m, 2H), 7.37 – 7.29 (m, 4H), 7.18 (d,  $J$  = 7.9 Hz, 2H), 6.87 (d,  $J$  = 2.9 Hz, 1H), 2.40 (s, 3H);  $^{13}\text{C}$  NMR (126 MHz,  $\text{CDCl}_3$ ):  $\delta$  192.18, 142.40, 137.44, 136.70, 131.84, 131.72, 131.50, 129.93, 129.05, 128.64, 128.42, 128.35, 128.03, 127.08, 124.10, 122.11, 110.53, 21.58; **ESI-HRMS**: Calculated for  $\text{C}_{24}\text{H}_{20}\text{NO}^+$   $[\text{M}+\text{H}]^+$  338.1539, found 338.1533.

**(4-fluorophenyl)(5-phenyl-2-(o-tolyl)-1H-pyrrol-3-yl)methanone (3y):**

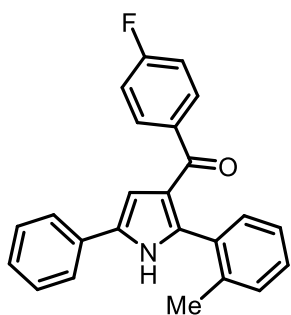

Yield: 55% (29 mg); Physical appearance: Yellow solid; M.p. 175–177 °C TLC  $R_f$  0.3 (3:1, Petroleum ether: EtOAc);  $^1\text{H}$  NMR (400 MHz,  $\text{CDCl}_3$ ):  $\delta$  8.74 (s, 1H), 7.82– 7.74 (m, 2H), 7.55 (d,  $J$  = 7.7 Hz, 2H), 7.43 (t,  $J$  = 7.6 Hz, 2H), 7.34 – 7.23 (m, 3H), 7.21–7.15 (m, 2H), 6.98 (t,  $J$  = 8.6 Hz, 2H), 6.93 (d,  $J$  = 2.8 Hz, 1H), 2.24 (s, 3H);  $^{13}\text{C}$  NMR (125 MHz,  $\text{CDCl}_3$ ):  $\delta$  190.44, 164.72 (d,  $J$  = 252.2 Hz), 137.47, 137.22, 135.56 (d,  $J$  = 3.1 Hz), 131.92, 131.73 (d,  $J$  = 9.0 Hz), 131.65, 131.39, 130.27, 129.12, 128.80, 127.19, 125.67, 124.00, 123.02, 114.77 (d,  $J$  = 21.6 Hz), 108.88,

20.07;  $^{19}\text{F}$  NMR (376 MHz,  $\text{CDCl}_3$ ):  $\delta$  -114.91 **ESI-HRMS**: Calculated for  $\text{C}_{24}\text{H}_{18}\text{FNNaO}^+$   $[\text{M}+\text{H}]^+$  378.1265, found 378.1291.

**1-(5-(4-fluorophenyl)-2-(4-methoxyphenyl)-1H-pyrrol-3-yl)hexan-1-one (3z):**

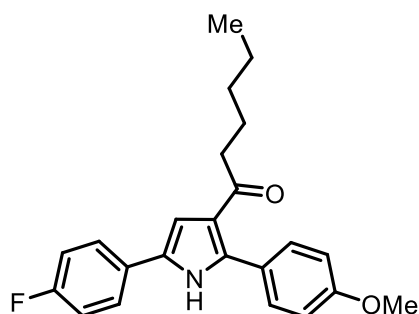

Yield: 46% (25 mg); Physical appearance: Pale yellow solid; M.p. 68–70 °C TLC  $R_f$  0.3 (4:1, Petroleum ether: EtOAc);  $^1\text{H}$  NMR (400 MHz,  $\text{CDCl}_3$ ):  $\delta$  8.58 (s, 1H), 7.55 (d,  $J$  = 8.8 Hz, 2H), 7.52 – 7.47 (m, 2H), 7.15 – 7.08 (m, 2H), 6.97 (d,  $J$  = 8.8 Hz, 2H), 6.88 (d,  $J$  = 2.9 Hz, 1H), 3.87 (s, 3H), 2.71 (t,  $J$  = 7.5 Hz, 2H), 1.71 – 1.63 (m, 2H), 1.35– 1.25 (m, 4H), 0.89 (t,  $J$  = 7.1 Hz, 3H);  $^{13}\text{C}$  NMR (125 MHz,  $\text{CDCl}_3$ )  $\delta$  197.23, 161.94 (d,  $J$  = 247.0 Hz), 159.96, 137.01, 130.49, 130.43, 127.92 (d,  $J$  = 3.3 Hz), 125.75 (d,  $J$  = 8.1 Hz), 124.61, 122.47, 116.05 (d,  $J$  = 22.0 Hz), 113.82, 108.07, 55.37, 40.81, 31.60, 24.40, 22.55, 13.98;  $^{19}\text{F}$  NMR (376 MHz,  $\text{CDCl}_3$ )  $\delta$  -114.81; **ESI-HRMS**: Calculated for  $\text{C}_{23}\text{H}_{25}\text{FNO}_2^+$   $[\text{M}+\text{H}]^+$  366.1864, found 366.1862.

**3,5-dimethyl-1-tosyl-1H-pyrazole (3ad):**

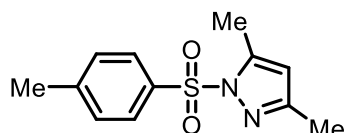

Yield: 28% (36 mg); Physical appearance: Pale yellow solid; M.p. 71–73 °C TLC  $R_f$  0.3 (9:1, Petroleum ether: EtOAc);  $^1\text{H}$  NMR (400 MHz,  $\text{CDCl}_3$ ):  $\delta$  7.85 (d,  $J$  = 8.5 Hz, 2H), 7.32 (d,  $J$  = 8.2 Hz, 2H), 5.91 (s, 1H), 2.51 (s, 3H), 2.43 (s, 3H), 2.22 (s, 3H);  $^{13}\text{C}$  NMR (125 MHz,  $\text{CDCl}_3$ ):  $\delta$  153.37, 145.10, 144.07, 135.44, 129.87, 127.59, 110.70, 21.65, 13.84, 13.11; **ESI-HRMS**: Calculated for  $\text{C}_{12}\text{H}_{14}\text{N}_2\text{NaO}_2\text{S}^+$   $[\text{M}+\text{Na}]^+$  273.0668, found 273.0692.

**1-((2-chloroethyl)sulfonyl)-4-methylbenzene (3ae):**

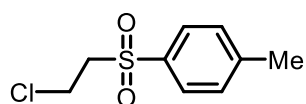

Yield: 26% (28 mg); Physical appearance: Pale yellow gel; TLC  $R_f$  0.5 (9:1, Petroleum ether: EtOAc);  $^1\text{H}$  NMR (500 MHz,  $\text{CDCl}_3$ ):  $\delta$  7.84 (d,  $J$  = 8.4 Hz, 2H), 7.39 (d,  $J$  = 8.0 Hz, 2H), 4.27 (t,  $J$  = 6.0 Hz, 2H), 3.68 (t,  $J$  = 6.0 Hz, 2H), 2.49 (s, 3H);  $^{13}\text{C}$  NMR (126 MHz,  $\text{CDCl}_3$ )  $\delta$  145.23, 132.64, 129.96, 127.98, 68.91, 40.74, 21.66; **ESI-HRMS**: Calculated for  $\text{C}_9\text{H}_{11}\text{ClNaO}_2\text{S}^+$   $[\text{M}+\text{Na}]^+$  241.0060, found 241.0041.

**(2-tosylethene-1,1-diyl)dibenzene (4a):**<sup>8</sup>

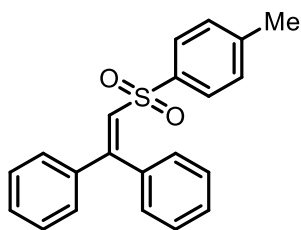

Yield: 30% (18 mg); Physical appearance: White solid; <sup>1</sup>H NMR (400 MHz, CDCl<sub>3</sub>): δ 7.50 (d, *J* = 8.3 Hz, 2H), 7.41 – 7.36 (m, 2H), 7.32 (t, *J* = 7.4 Hz, 4H), 7.24 – 7.21 (m, 2H), 7.17 (d, *J* = 8.0 Hz, 2H), 7.14 – 7.10 (m, 2H), 7.01 (s, 1H), 2.40 (s, 3H).

**References:**

- (1) Armarego, W. L. F. *Purification of Laboratory Chemicals*; 8<sup>th</sup> Edition; Butterworth-Heinemann, **2017**.
- (2) P. Kumar and M. Kapur, *Org. Lett.*, **2019**, *21*, 2134.
- (3) P. Kumar and M. Kapur, *Org. Lett.*, **2020**, *22*, 5855.
- (4) X. Lei, L. Li, Y.-P. He and Y. Tang, *Org. Lett.*, **2015**, *17*, 5224.
- (5) X. Liu, D. Hong, Z. She, W. H. Hersh, B. Yoo and Y. Chen, *Tetrahedron*, **2018**, *74*, 6593.
- (6) P. Kumar and M. Kapur, *Asian J. Org., Chem.*, **2020**, *9*, 1065.
- (7) G. C. Senadi, W.-P. Hu, A. M. Garkhedkar, S. S. K. Boominathana and J.-J. Wang, *Chem. Commun.*, **2015**, *51*, 13795.
- (8) S. Mao, Y.-R. Gao, X.-Q. Zhu, D.-D. Guo and Y.-Q. Wang, *Org. Lett.*, **2015**, *17*, 1692.

7.88  
7.87  
7.86  
7.85  
7.83  
7.82  
7.51  
7.50  
7.48  
7.46  
7.46  
7.45  
7.44  
7.43  
6.82

PK-02-140-1HNMR-400MHz-CDCl3-17-12-16

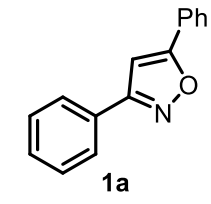

6.82

7.51  
7.50  
7.48  
7.46  
7.46  
7.45  
7.44  
7.43

7.88  
7.87  
7.86  
7.85  
7.83  
7.82

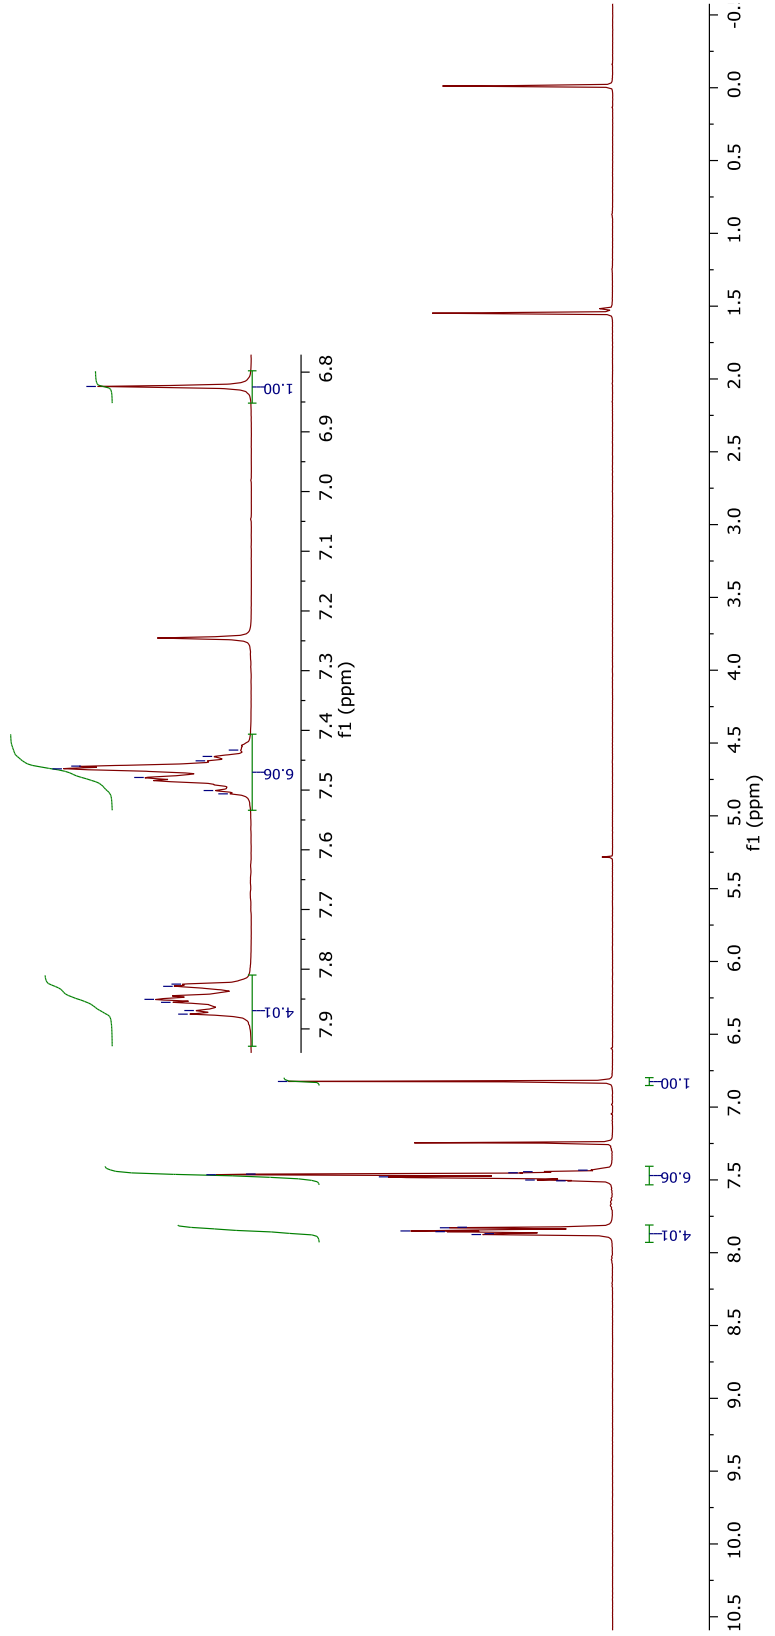

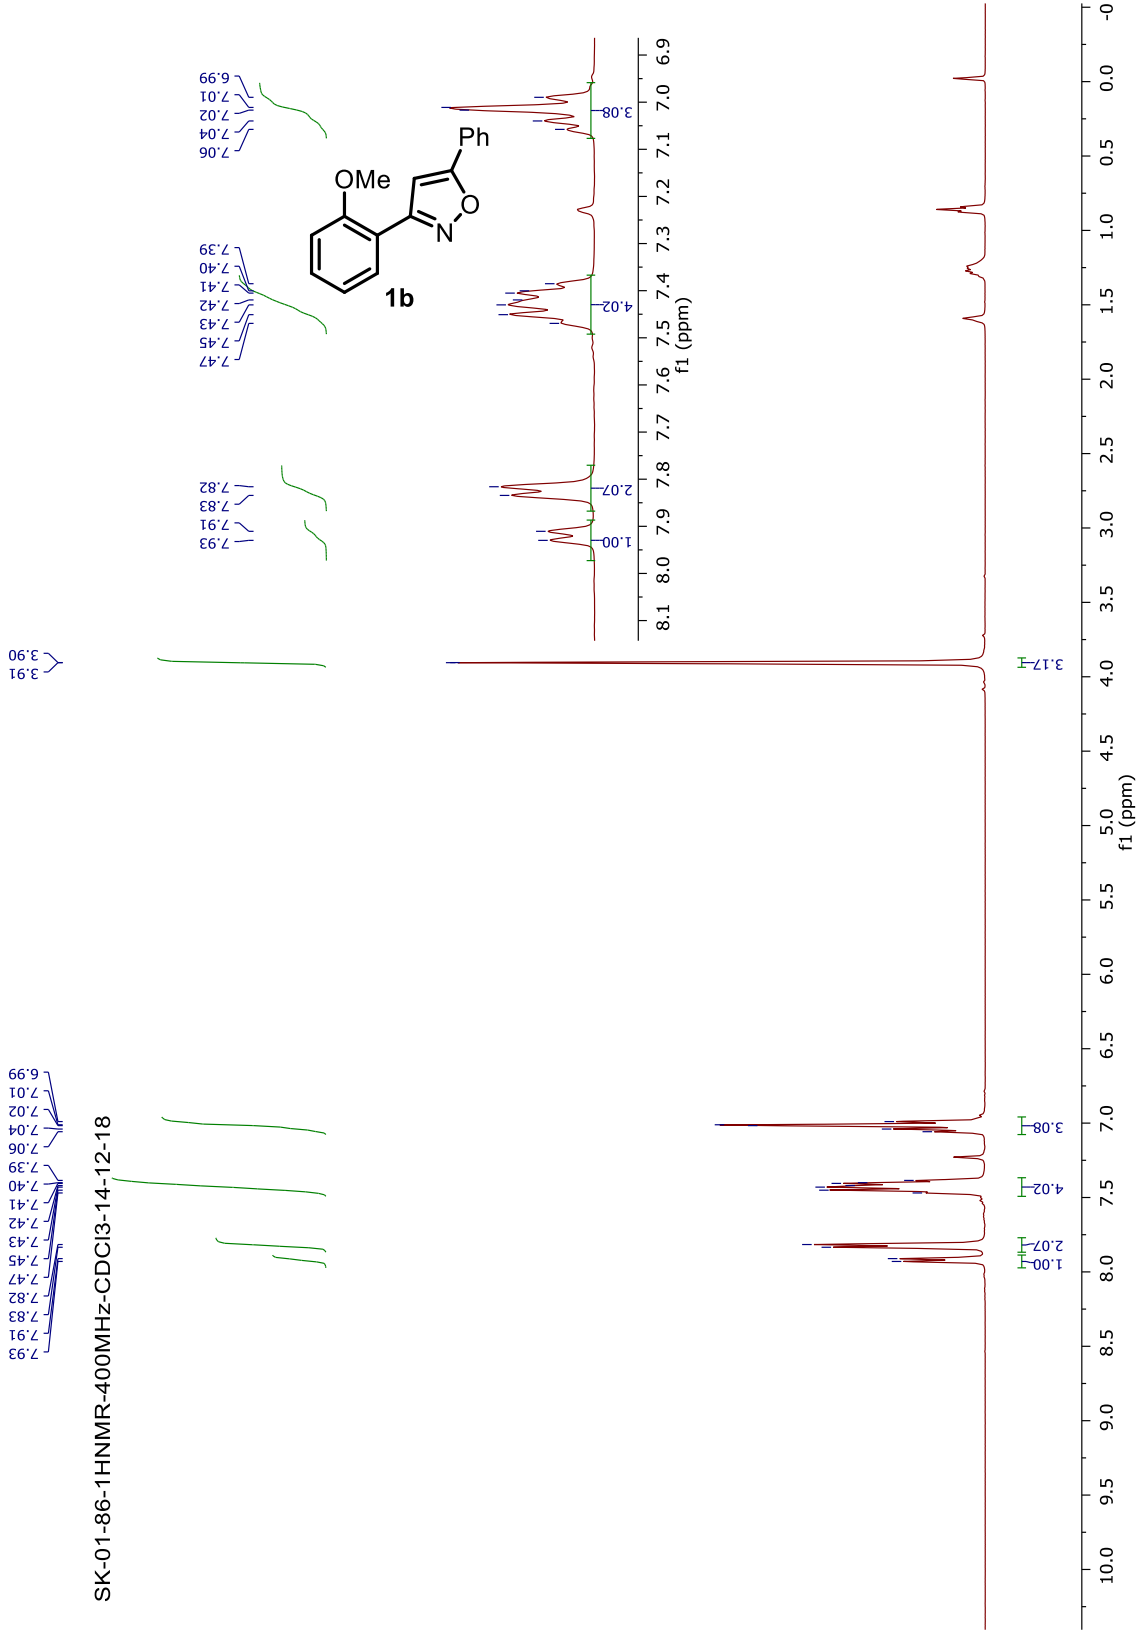



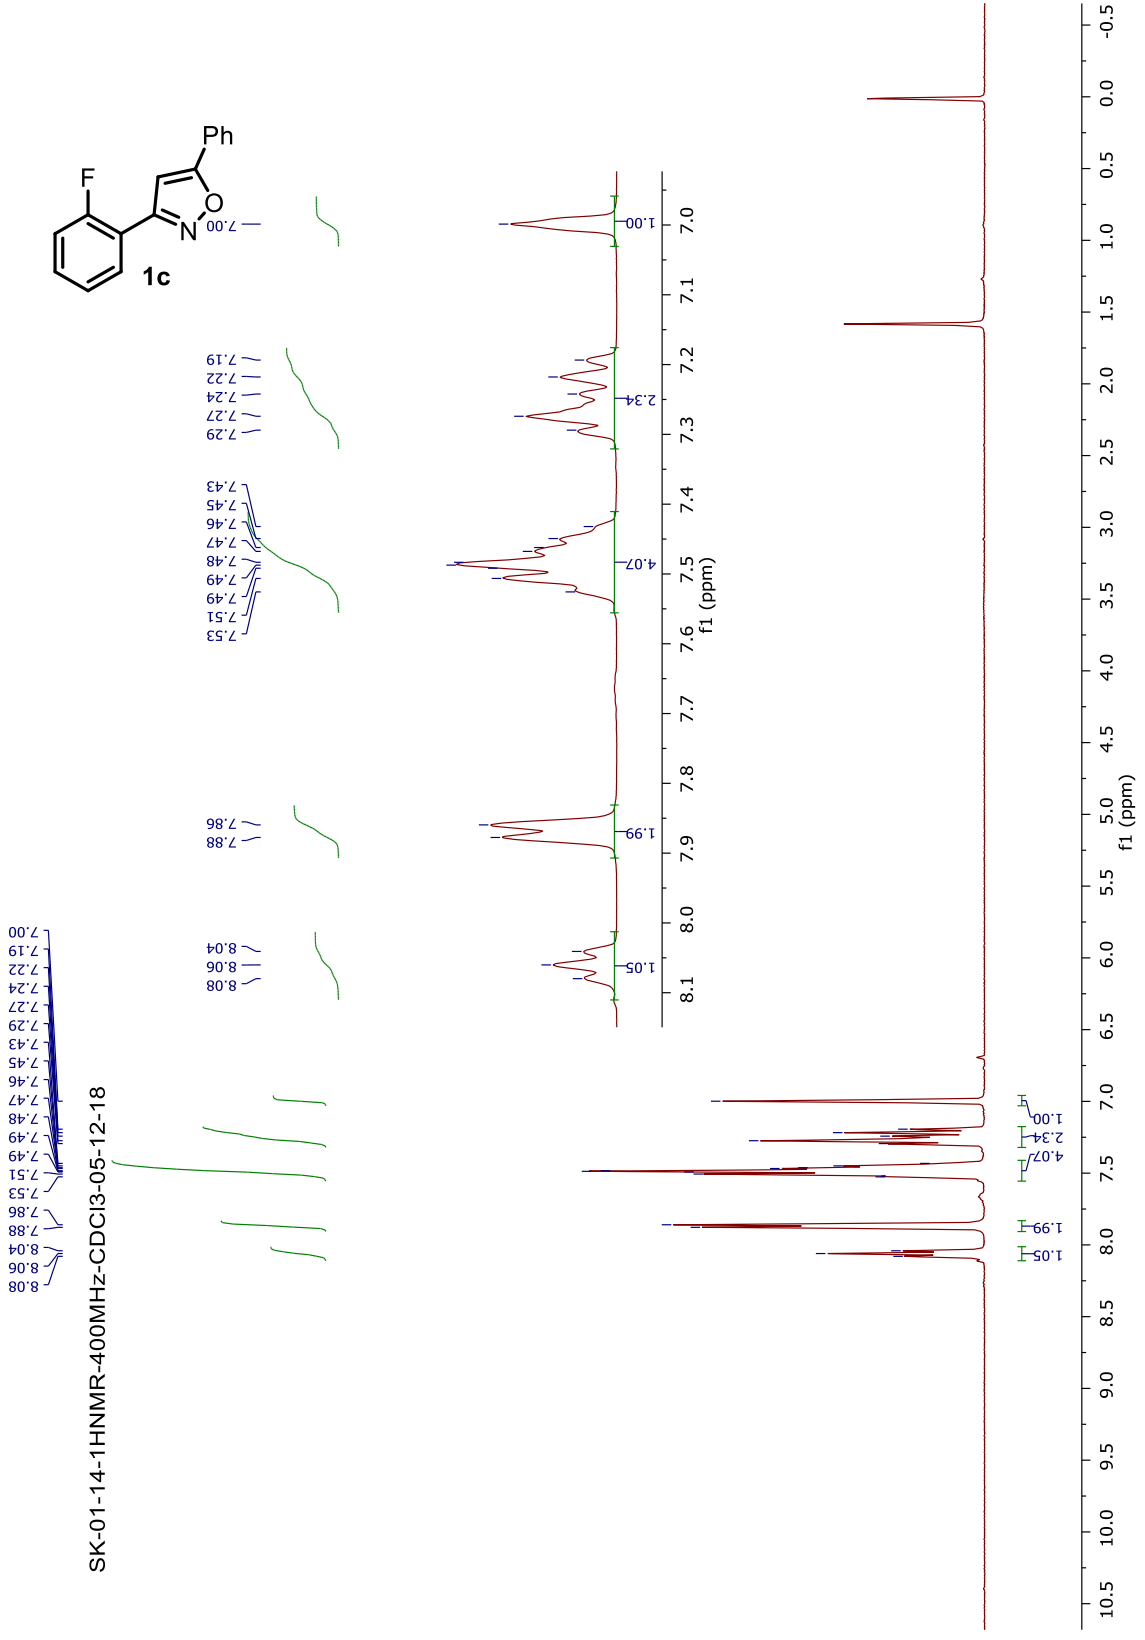

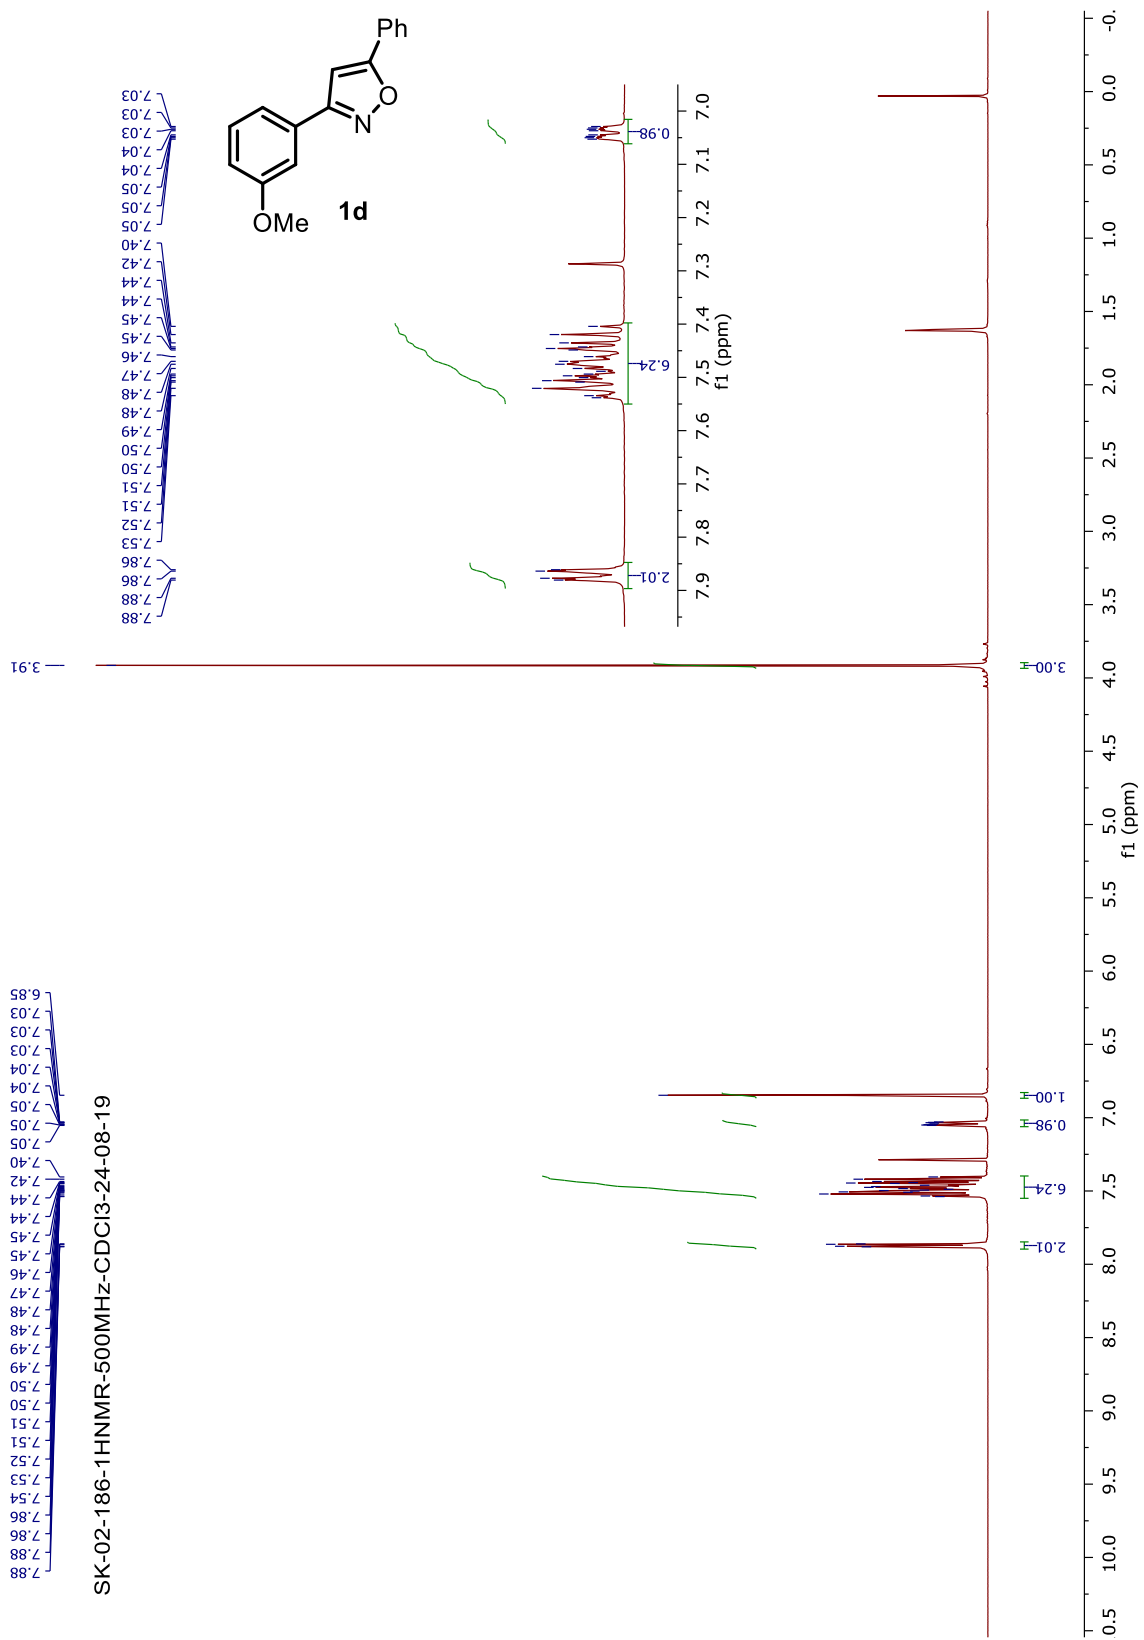

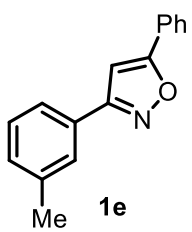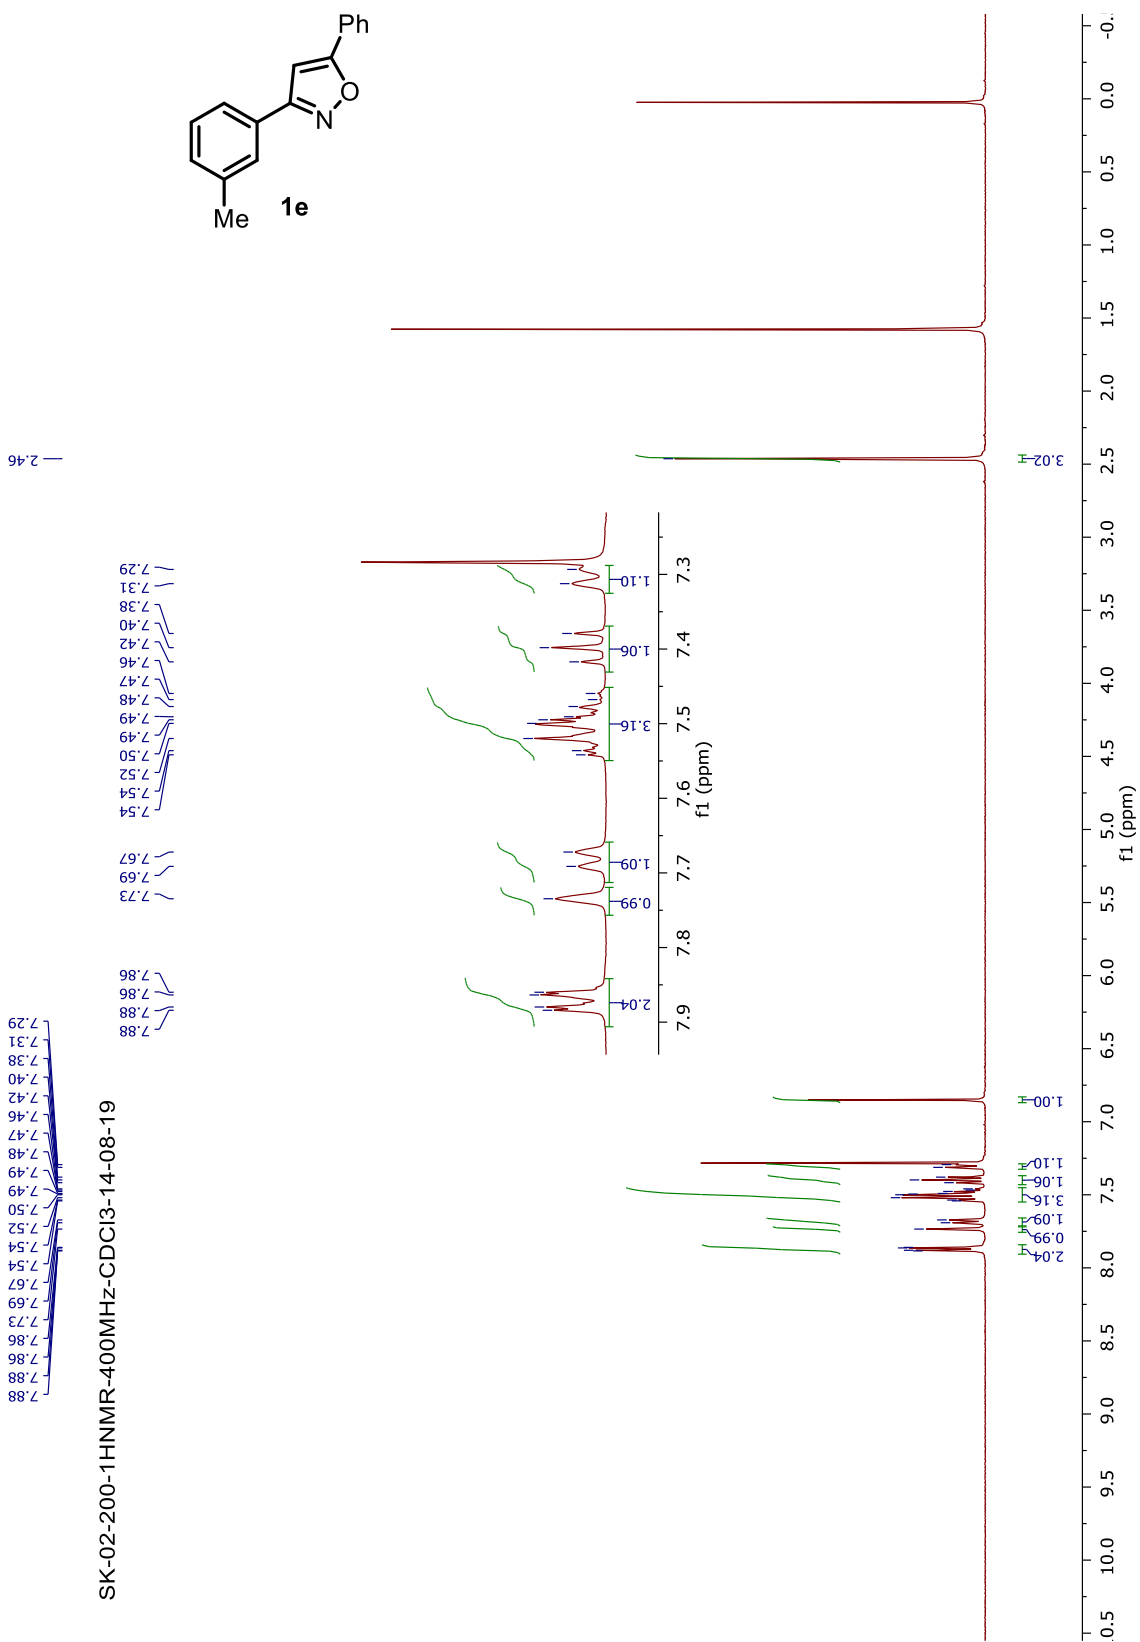

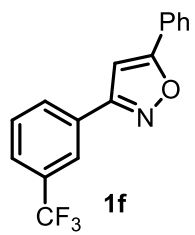

SK-02-297-1HNMR-400MHz-CDCl3-08-06-19

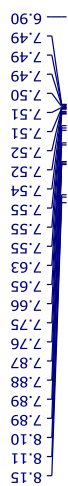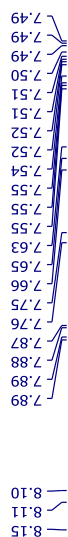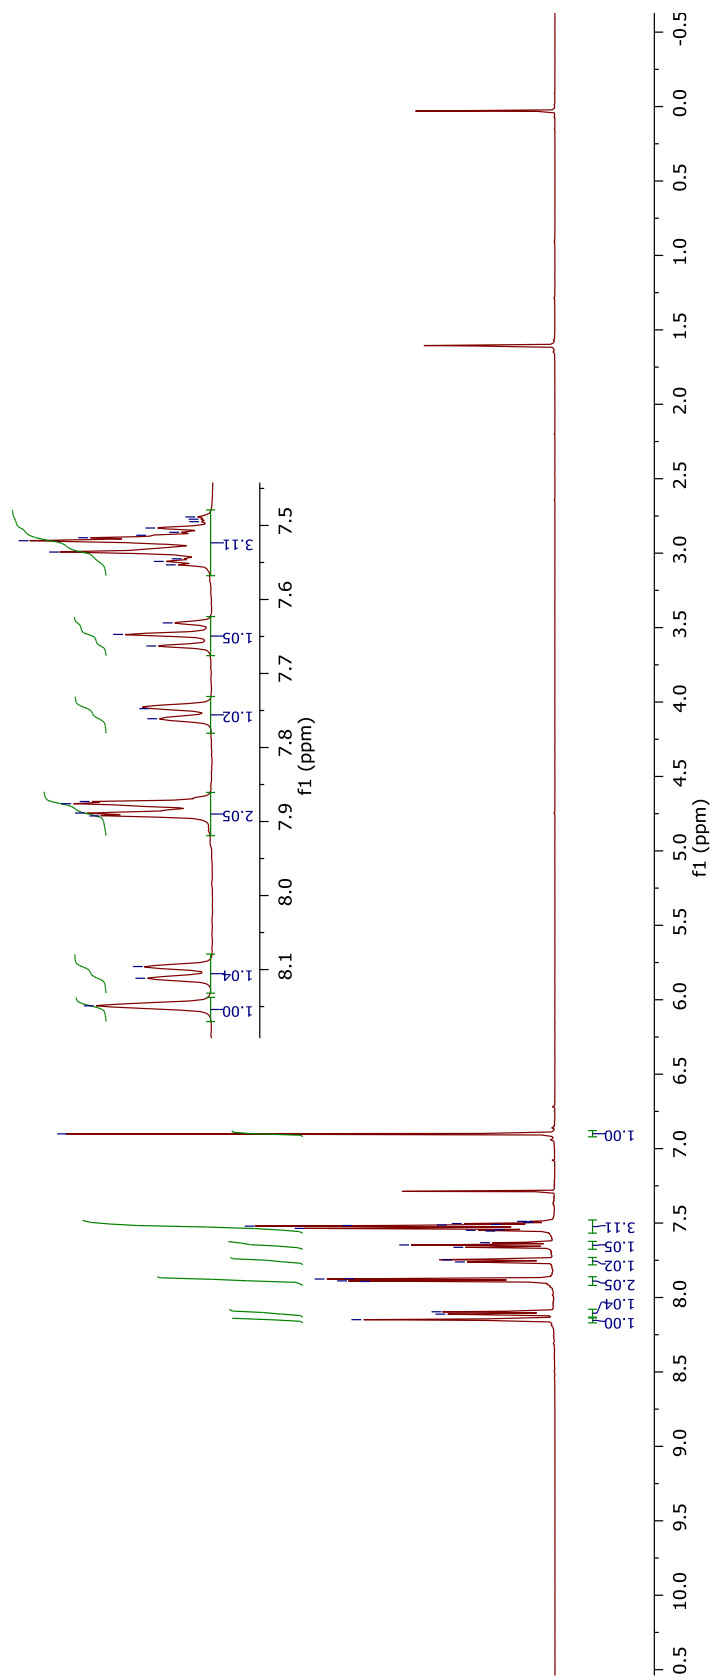

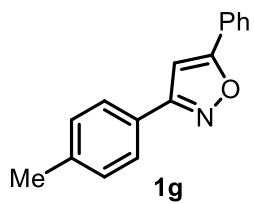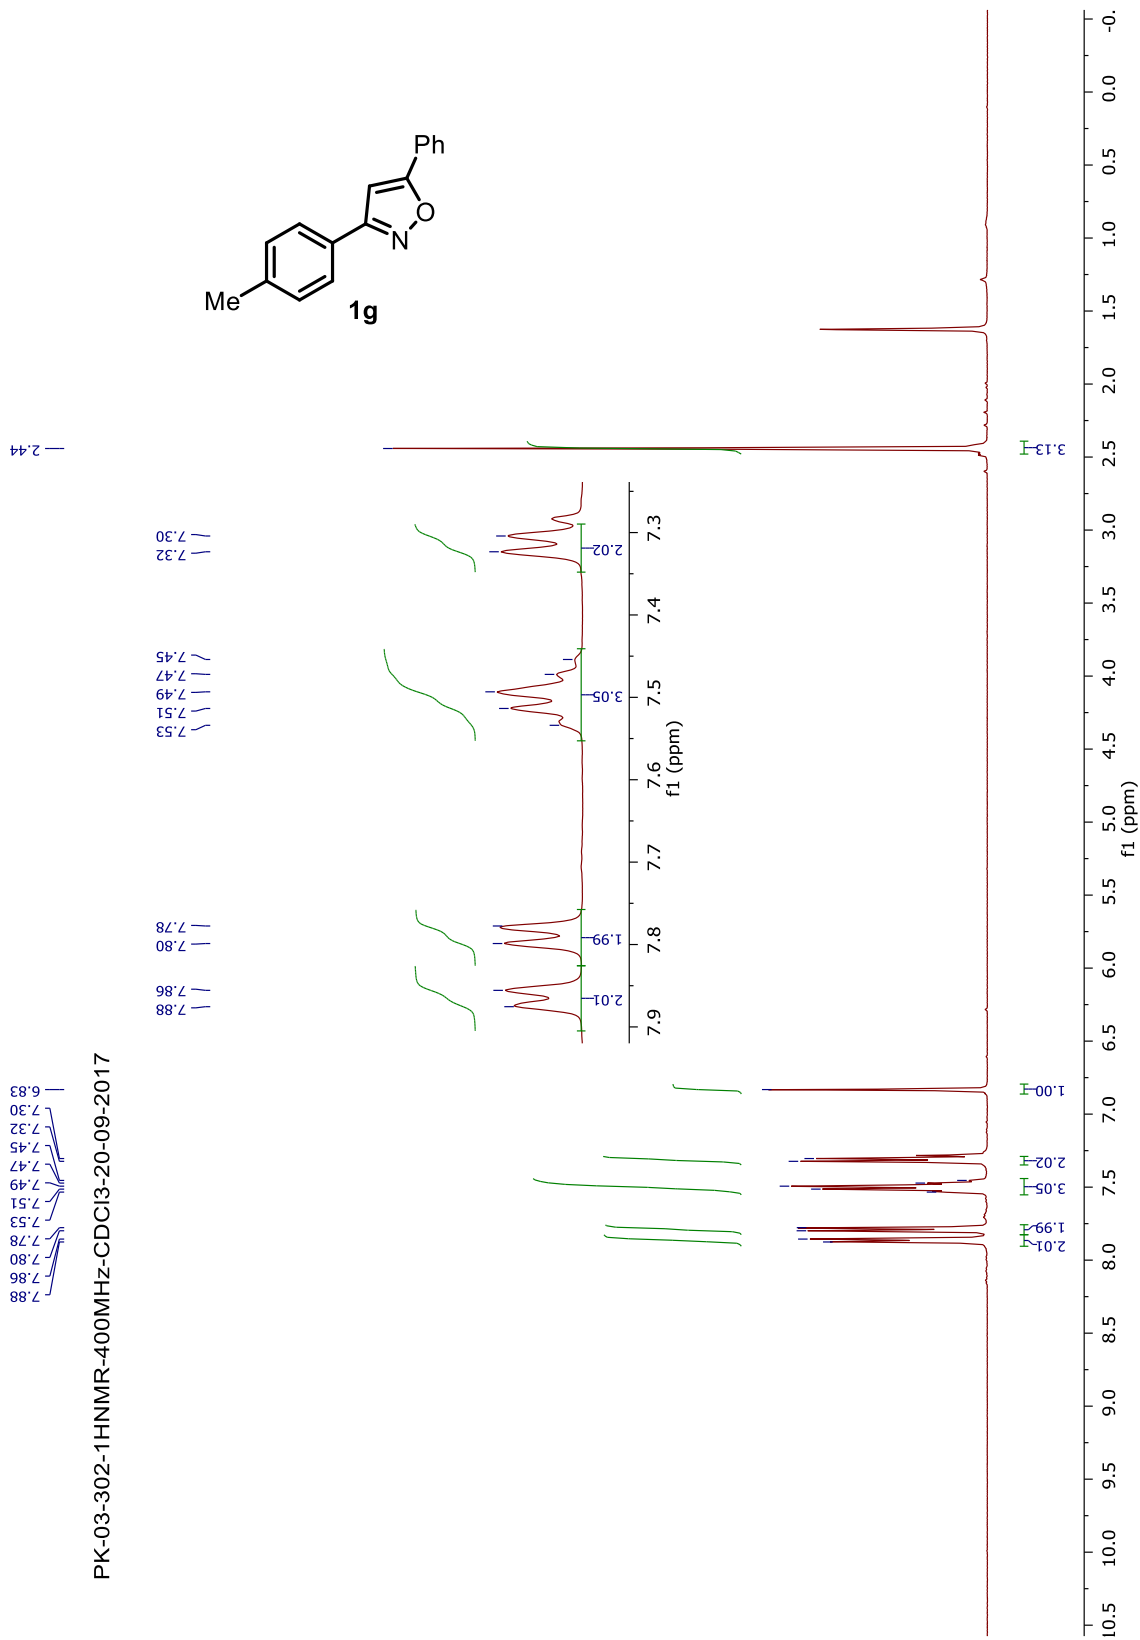

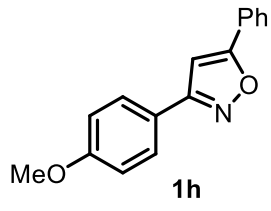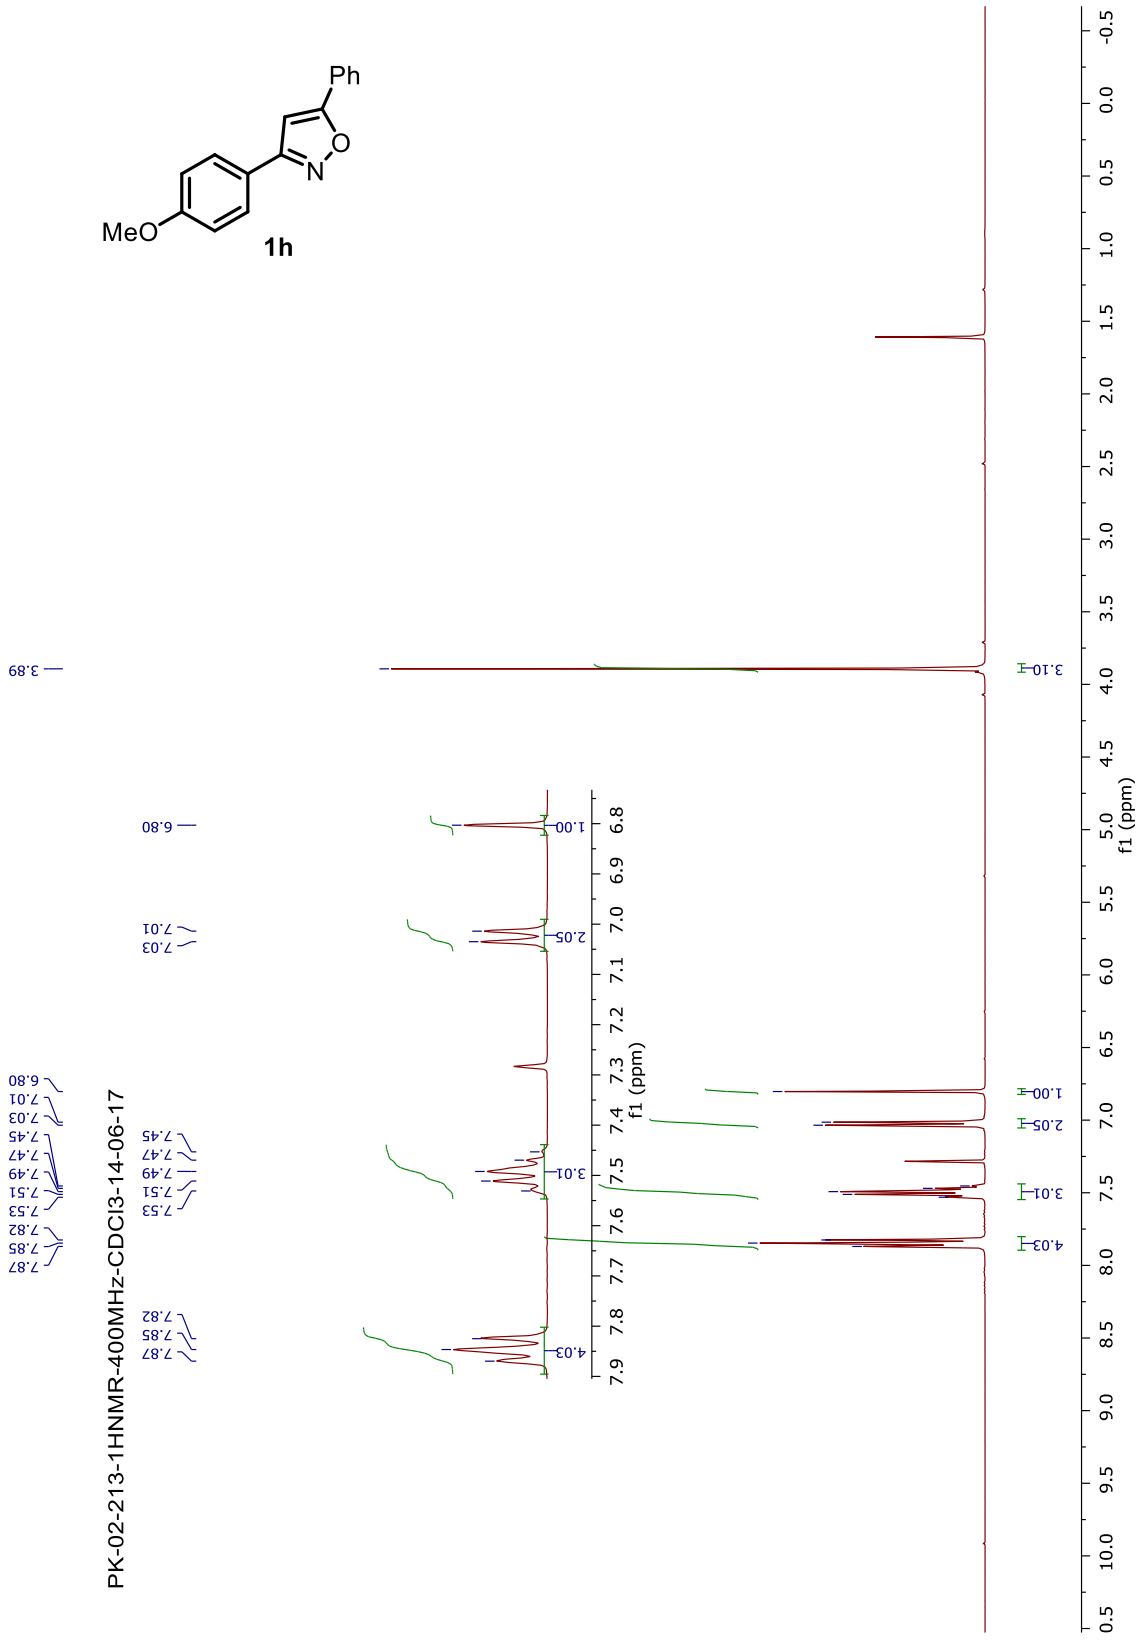

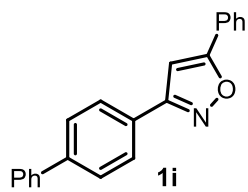

7.99  
 7.97  
 7.90  
 7.90  
 7.88  
 7.88  
 7.76  
 7.74  
 7.69  
 7.69  
 7.67  
 7.55  
 7.55  
 7.53  
 7.52  
 7.51  
 7.51  
 7.50  
 7.49  
 7.48  
 7.43  
 7.42  
 7.40  
 6.90

SK-02-325-1HNMR-400MHz-CDCI3-09-05-19

7.99  
 7.97  
 7.90  
 7.90  
 7.88  
 7.88  
 7.76  
 7.74  
 7.69  
 7.69  
 7.67  
 7.55  
 7.55  
 7.53  
 7.52  
 7.51  
 7.51  
 7.50  
 7.49  
 7.48  
 7.43  
 7.42  
 7.40

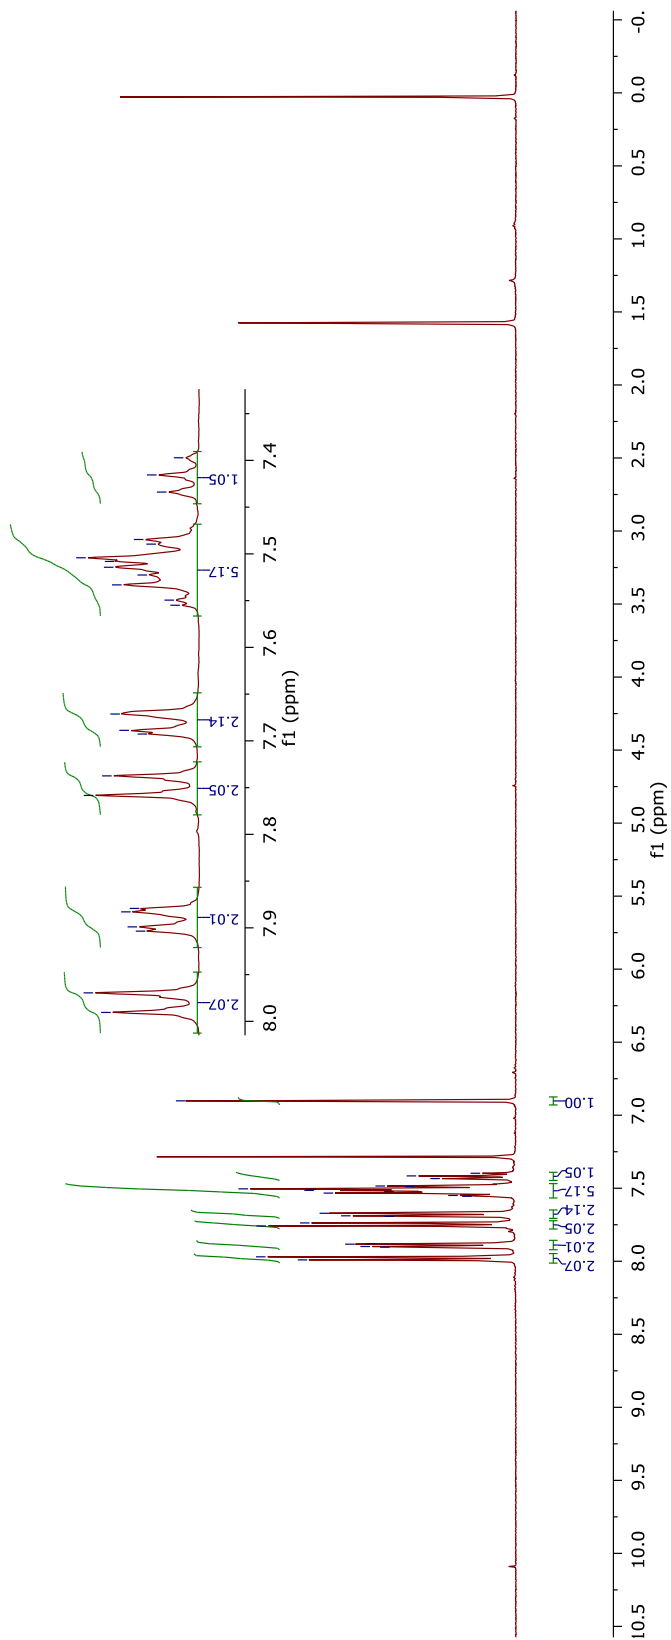

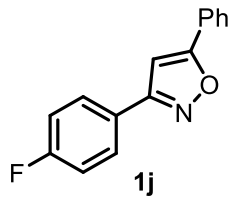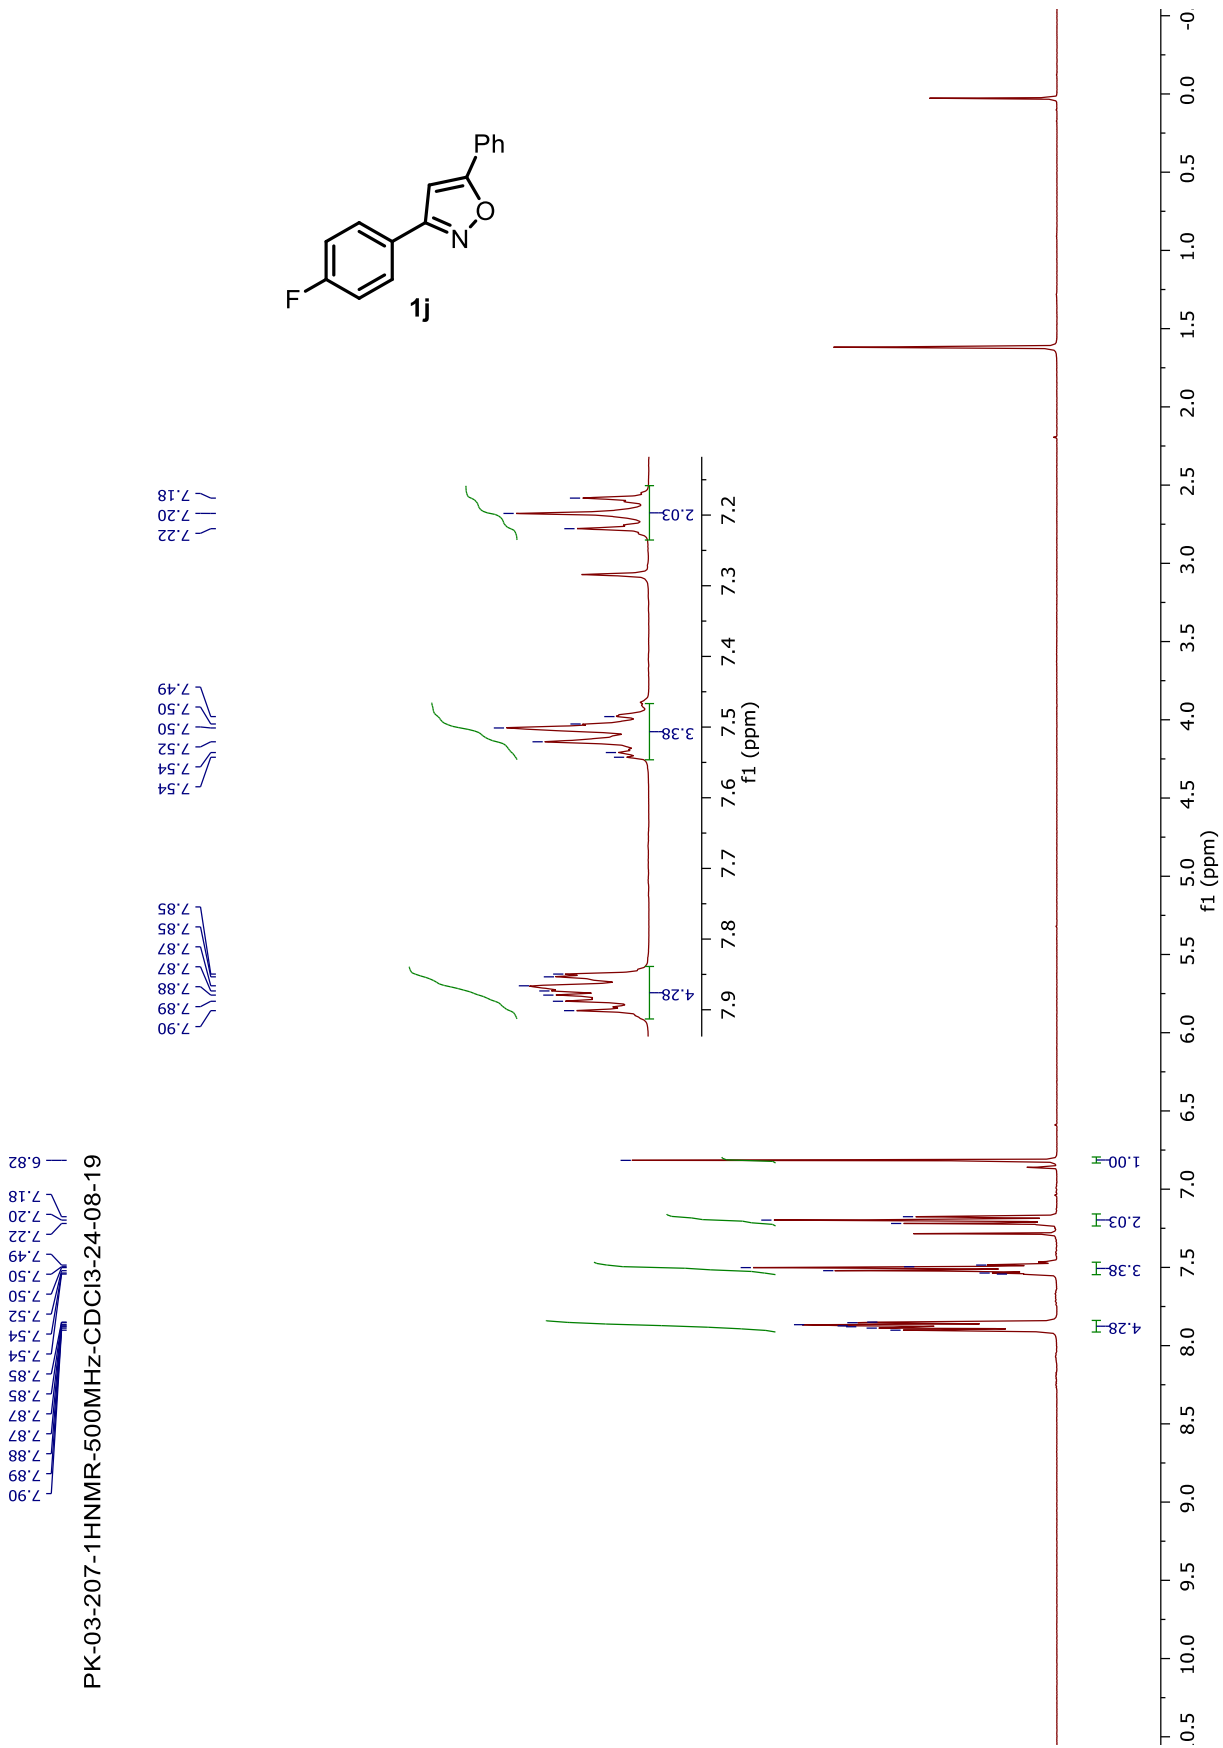



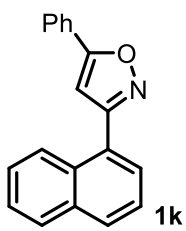

8.48  
8.47  
8.46  
8.01  
8.01  
7.99  
7.97  
7.96  
7.95  
7.94  
7.93  
7.92  
7.91  
7.81  
7.79  
7.62  
7.61  
7.61  
7.60  
7.59  
7.58  
7.58  
7.57  
7.56  
7.54  
7.53  
7.50  
6.88

PK-06-990-1HNMR-400MHz-CDCI3-18-12-19

8.48  
8.47  
8.46  
8.01  
8.01  
7.99  
7.97  
7.96  
7.95  
7.94  
7.93  
7.92  
7.91  
7.81  
7.79  
7.62  
7.61  
7.61  
7.60  
7.59  
7.58  
7.58  
7.57  
7.56  
7.54  
7.53  
7.50

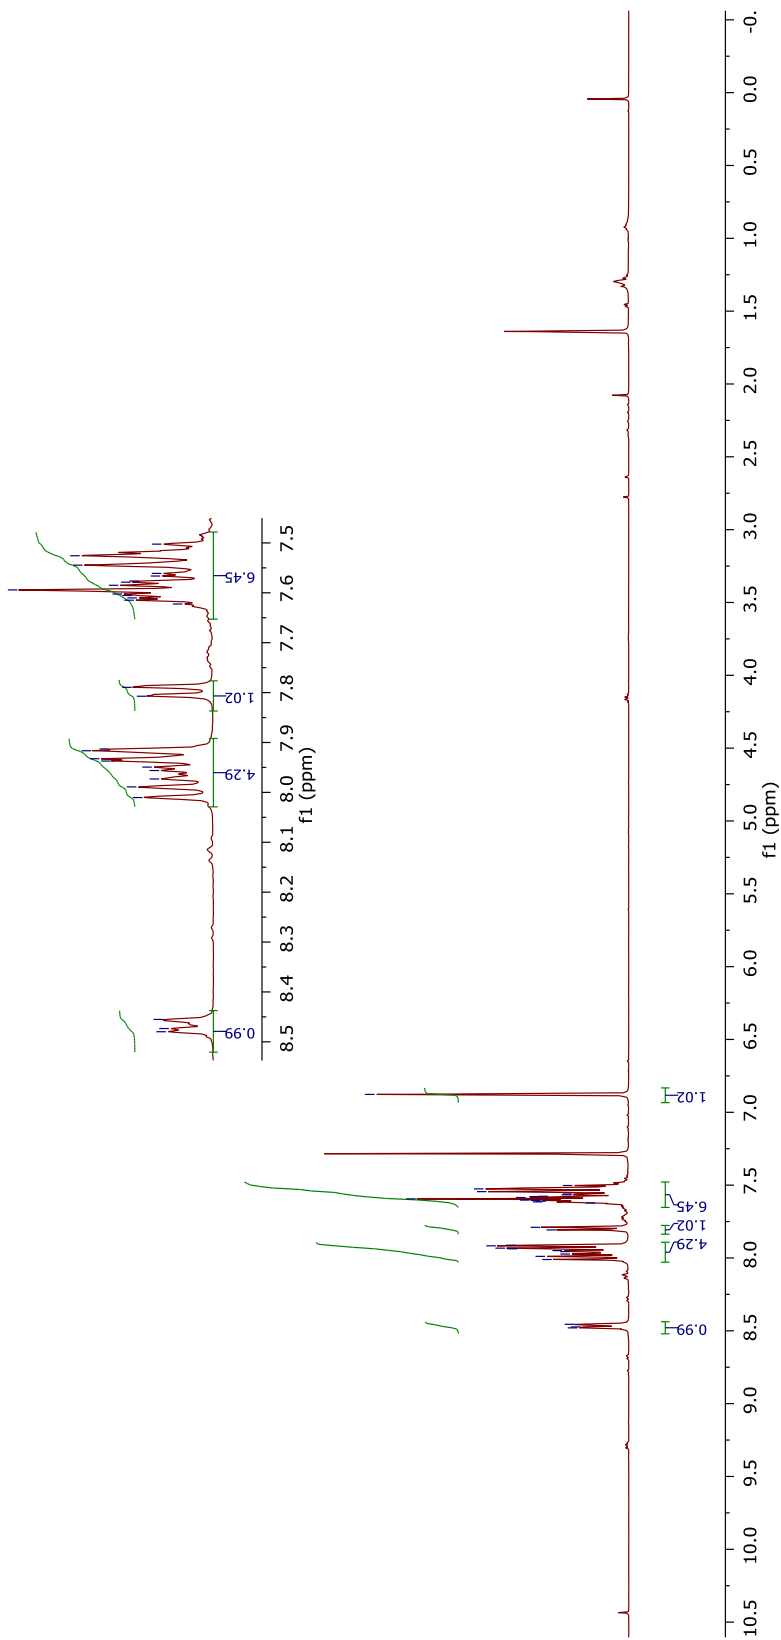

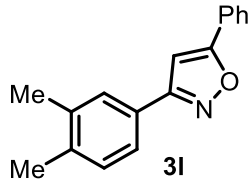

2.37  
2.35

7.86  
7.88  
7.88  
7.70  
7.63  
7.62  
7.61  
7.61  
7.53  
7.53  
7.52  
7.51  
7.51  
7.49  
7.49  
7.48  
7.47  
7.47  
7.46  
7.27  
7.26

7.88  
7.86  
7.70  
7.63  
7.62  
7.61  
7.61  
7.53  
7.53  
7.52  
7.51  
7.51  
7.49  
7.49  
7.48  
7.47  
7.47  
7.46  
7.27  
7.26  
6.84

SK-02-321-1HNMR-400MHz-CDCl3-08-06-19

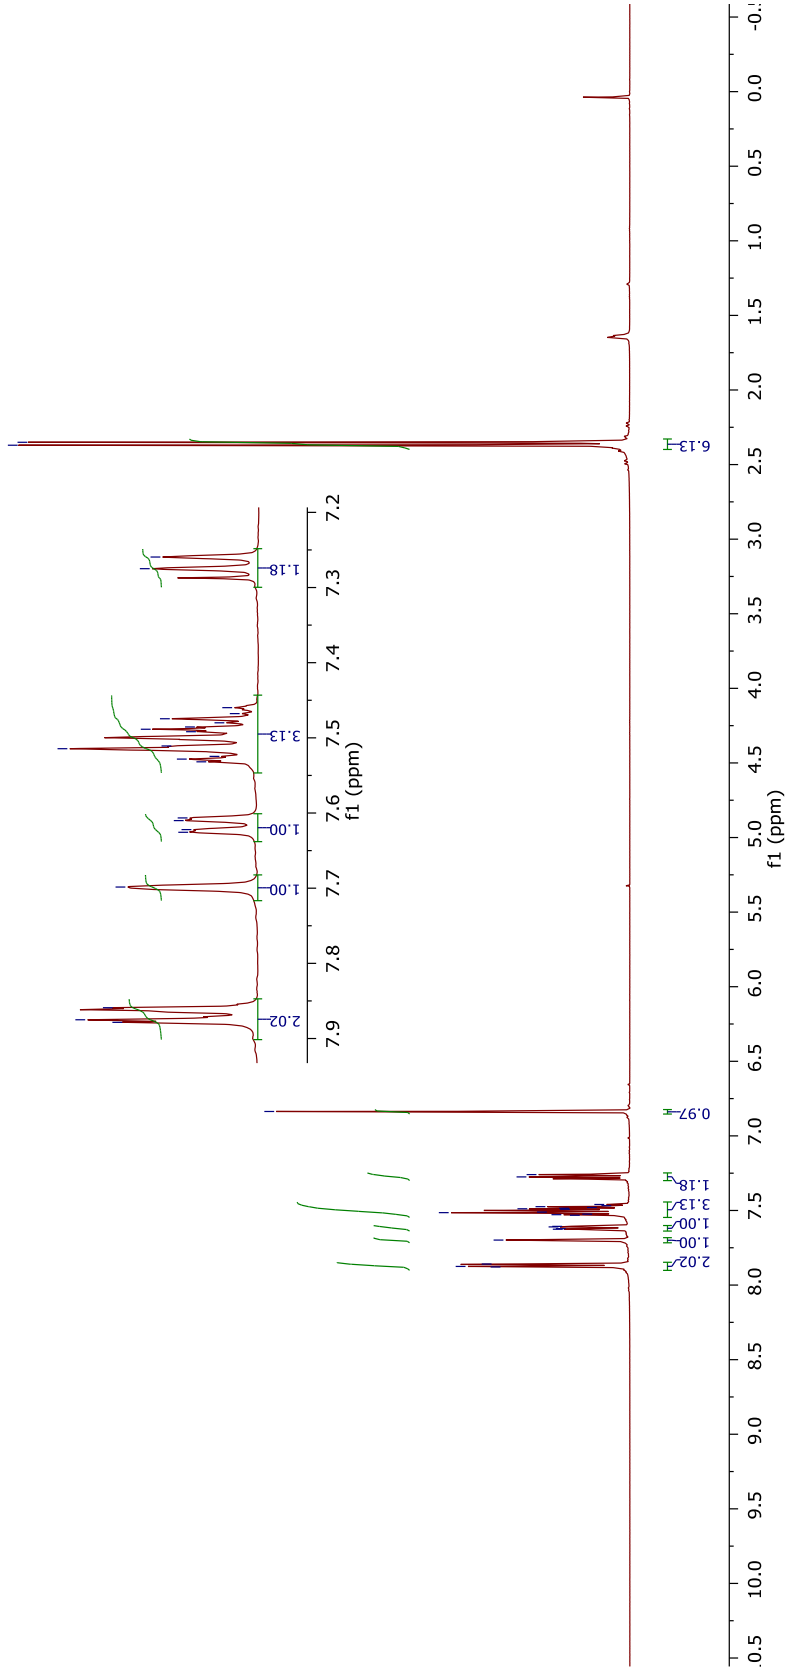

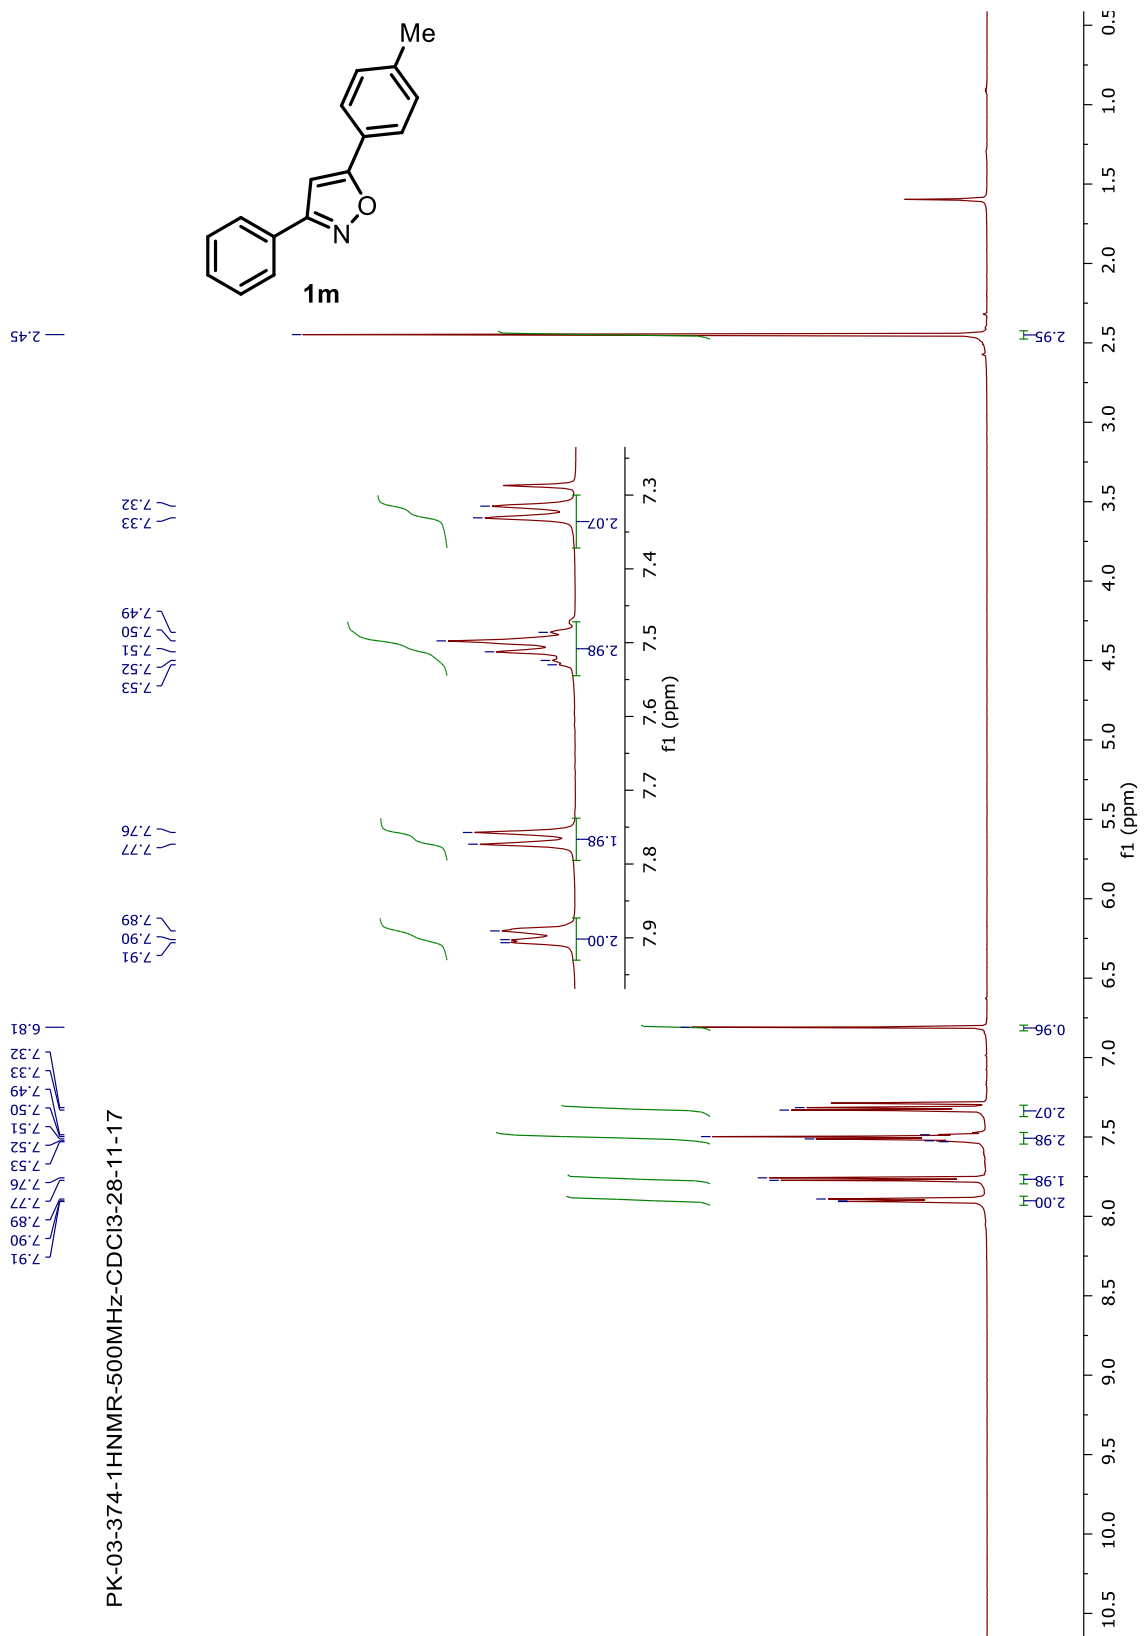

7.90  
7.89  
7.88  
7.86  
7.84  
7.54  
7.53  
7.52  
7.51  
7.50  
7.28  
7.23  
7.21  
7.19  
6.81

SK-03-31-1HNHMR-400MHZ-CDCI3-26-08-19

7.28  
7.23  
7.21  
7.19

7.54  
7.53  
7.52  
7.51  
7.50

7.90  
7.89  
7.88  
7.86  
7.84

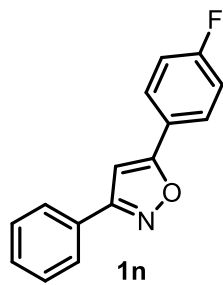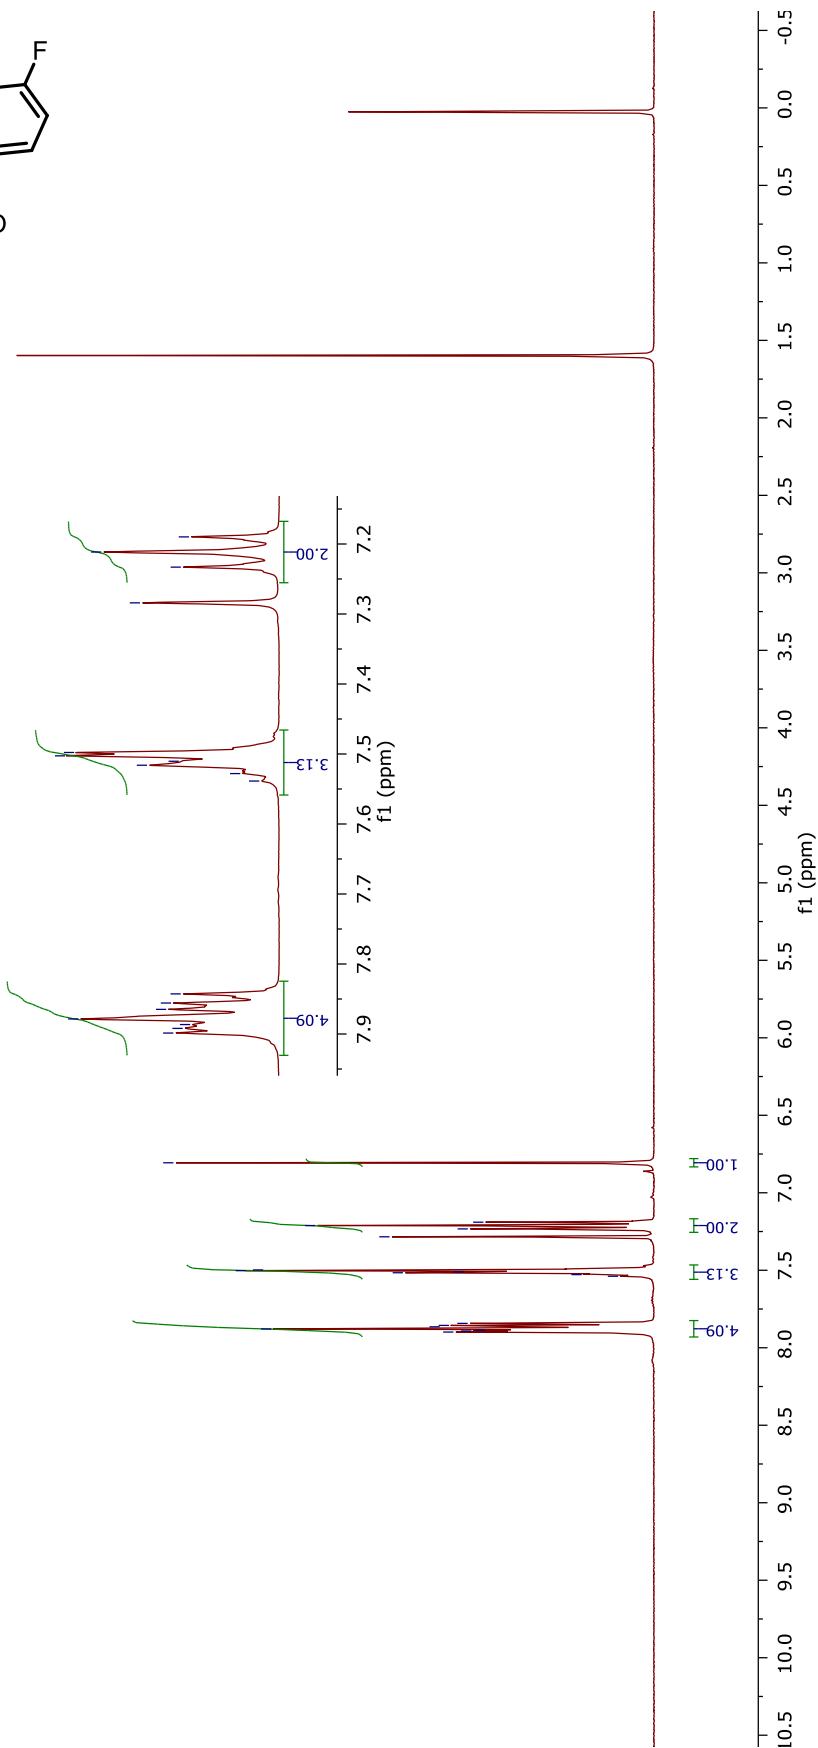

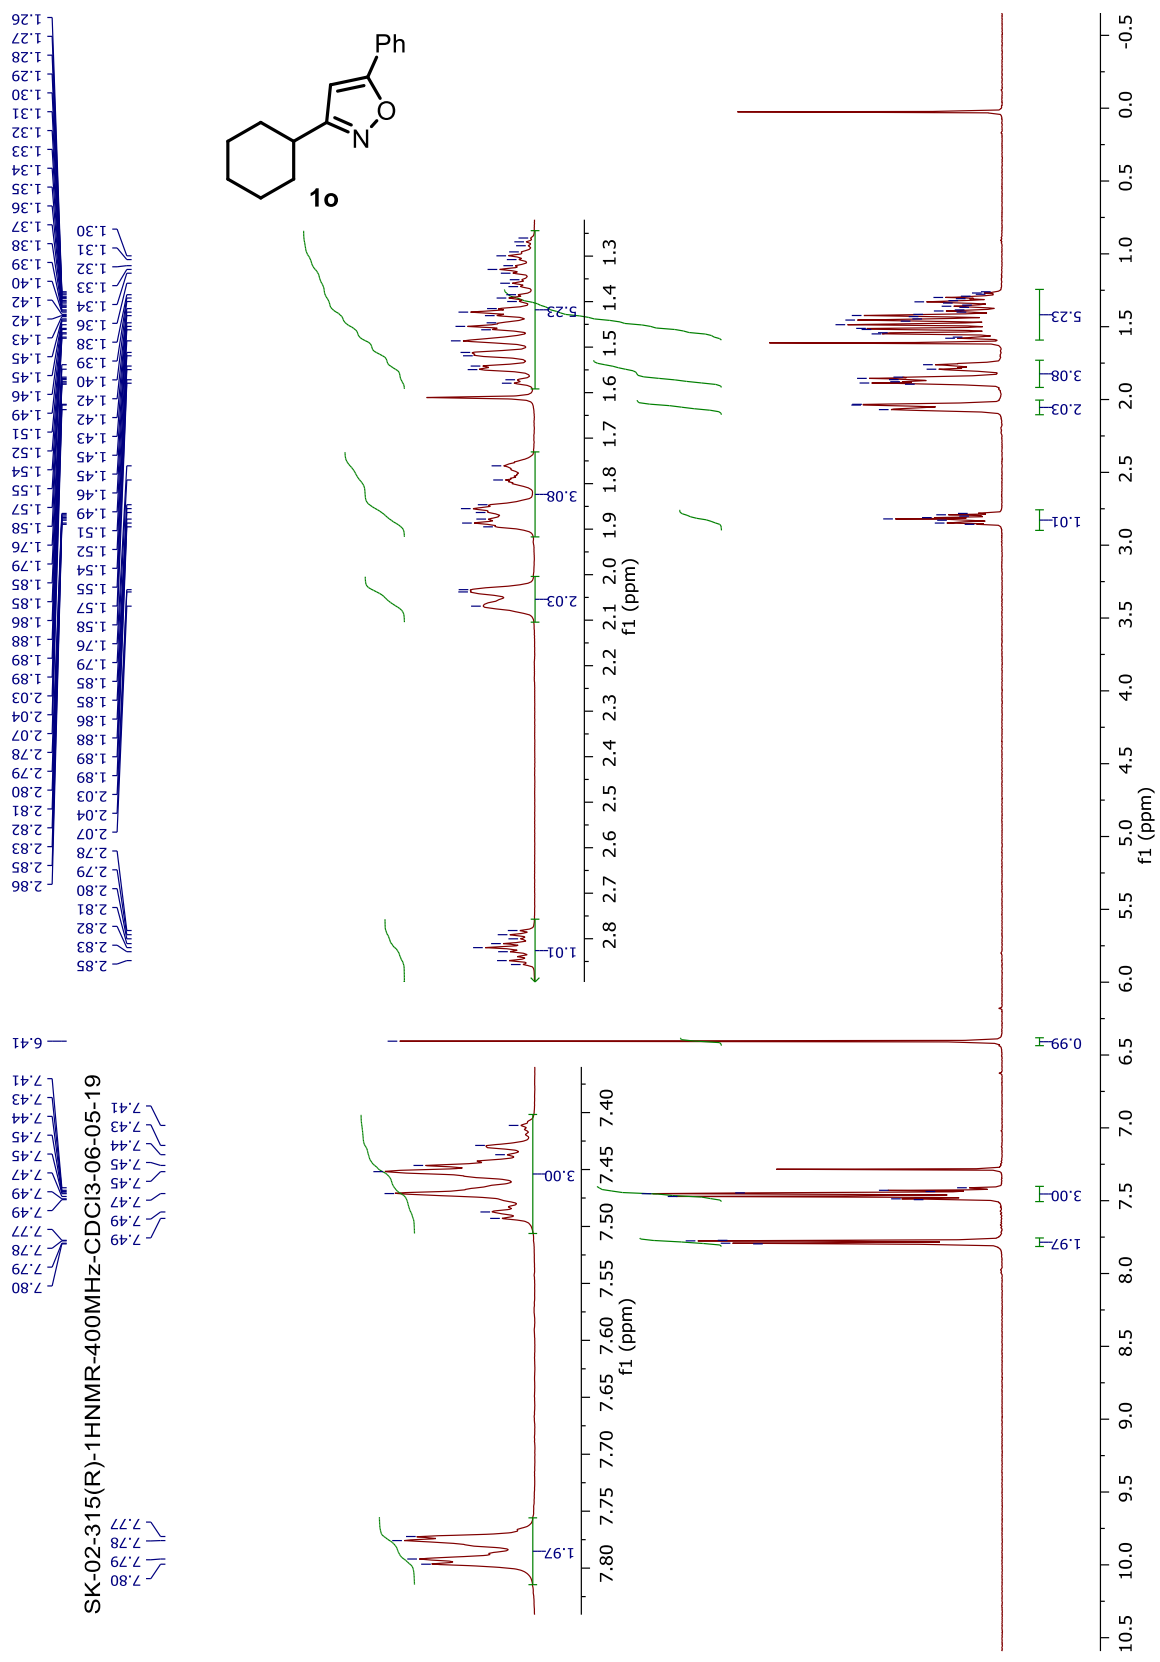

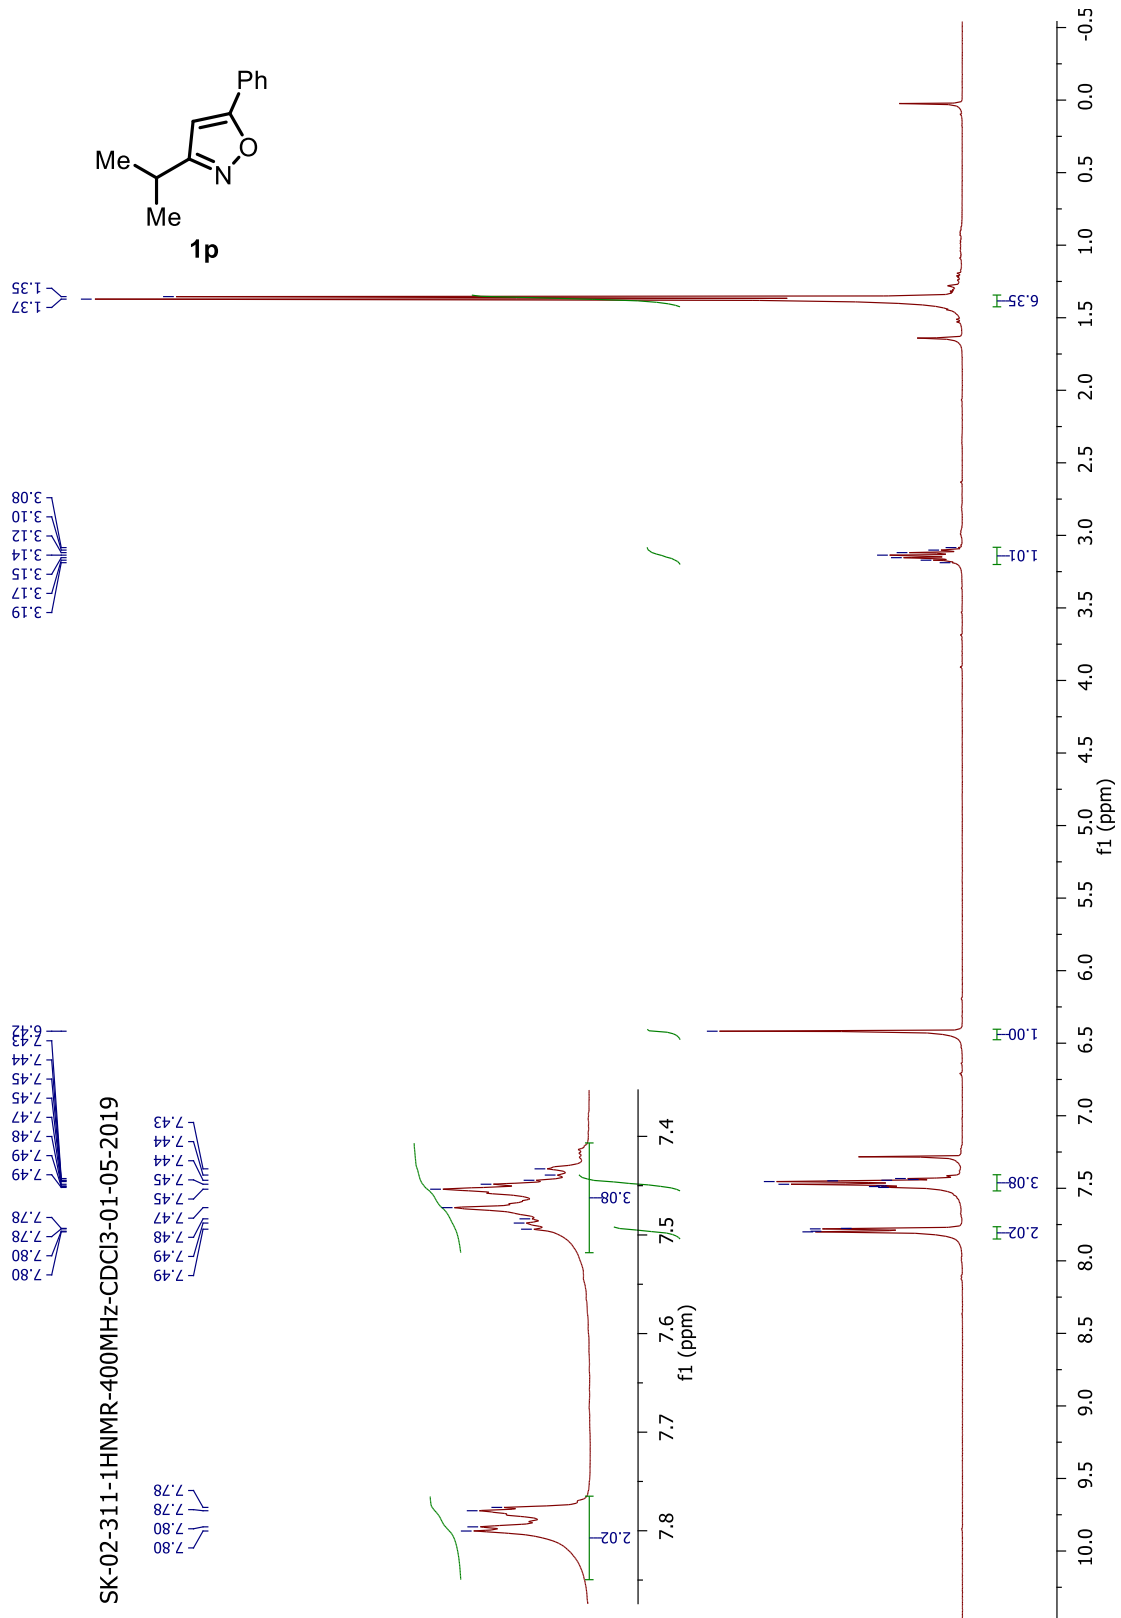

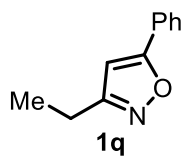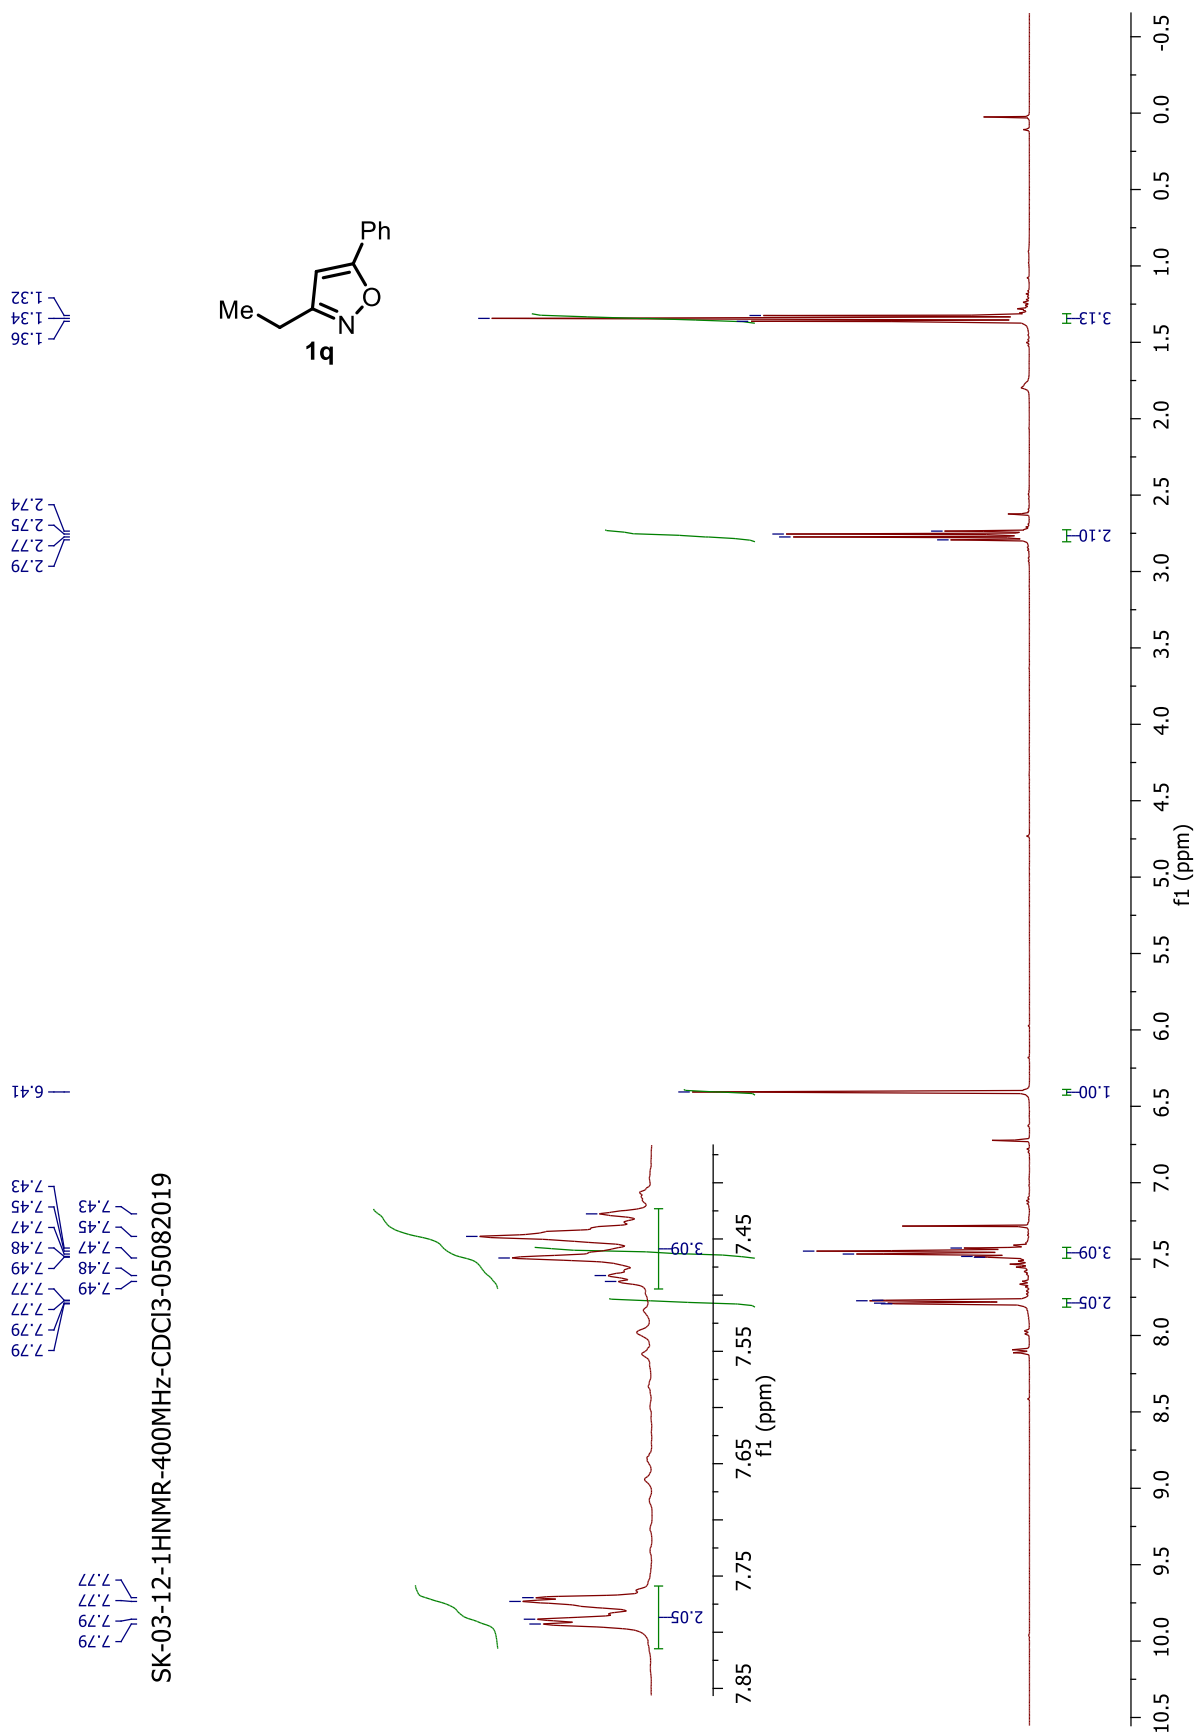

SK-03-12-1HNMR-400MHZ-CDCl3-05082019

7.79  
7.79  
7.77  
7.77  
7.49  
7.49  
7.48  
7.48  
7.47  
7.47  
7.45  
7.45  
7.43  
7.43  
6.41  
2.79  
2.77  
2.77  
2.75  
2.74  
1.36  
1.34  
1.32

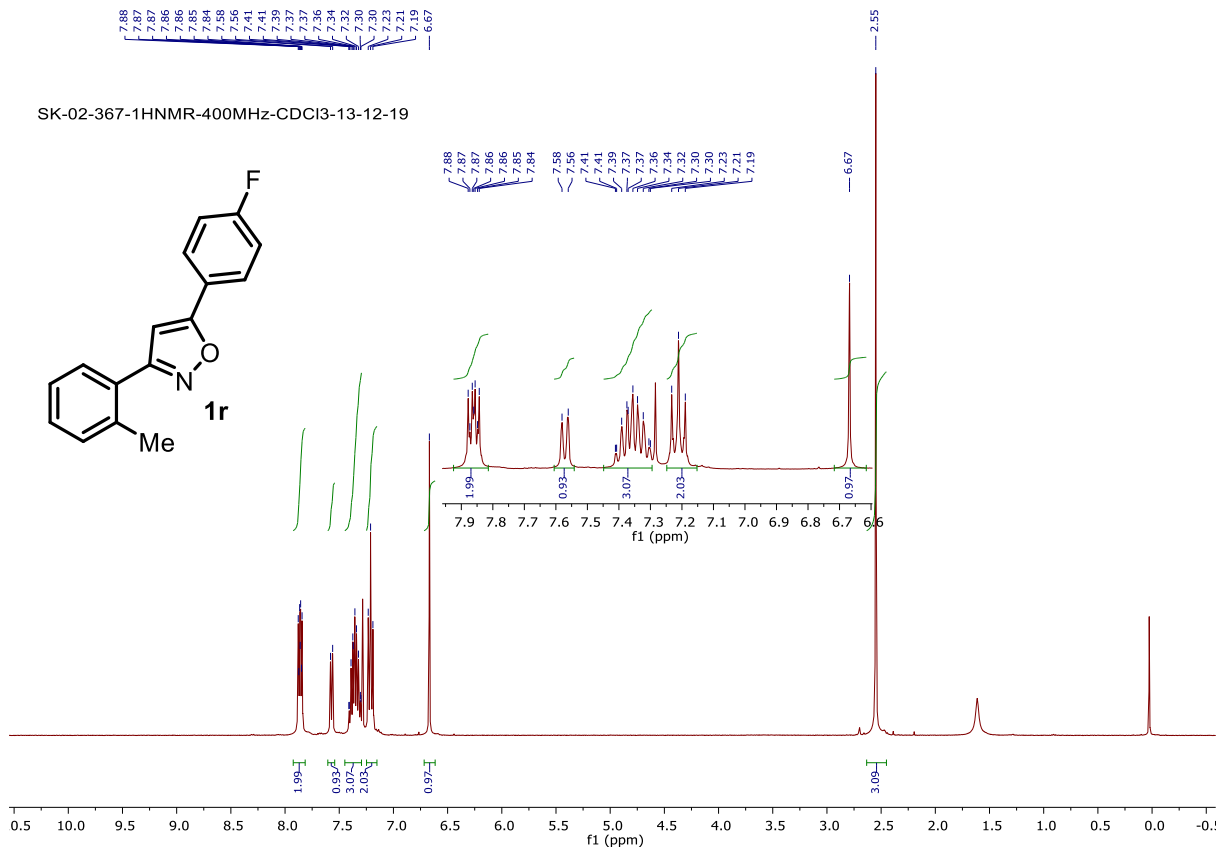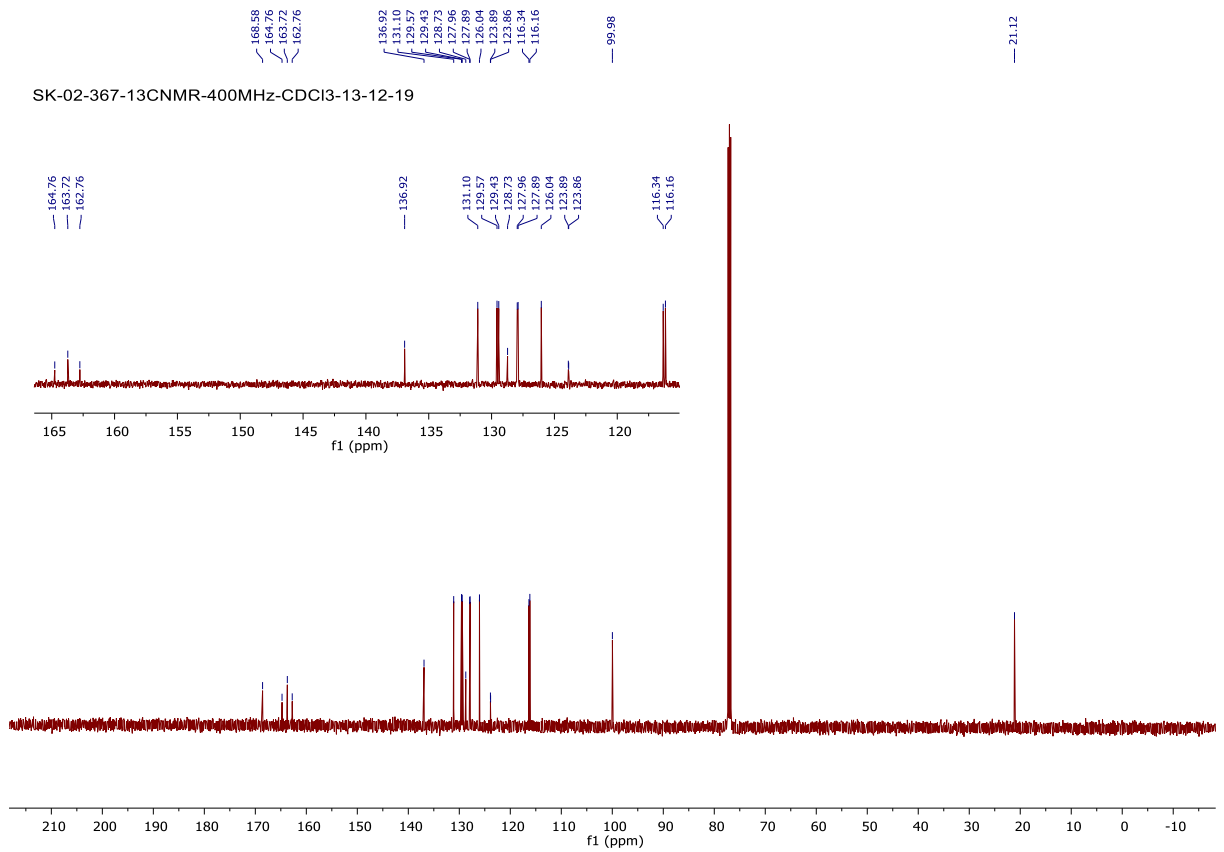



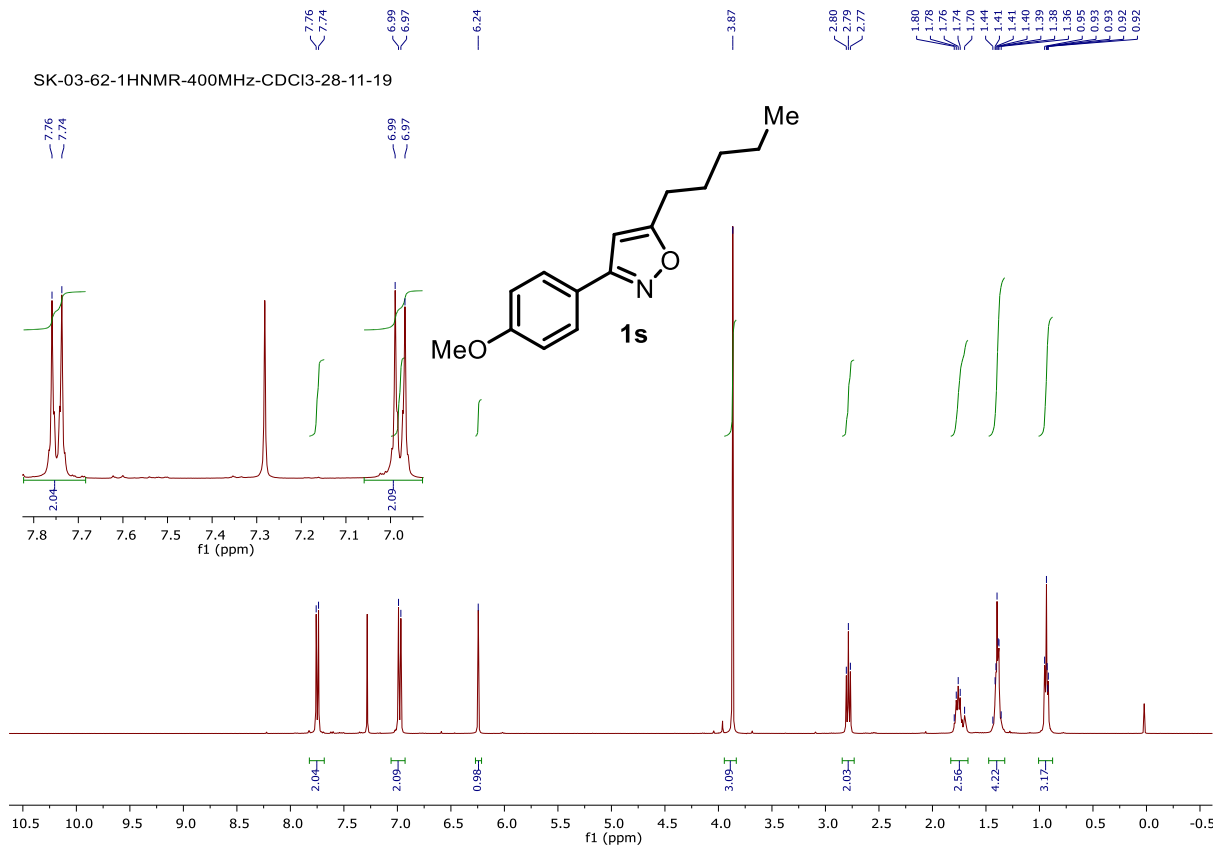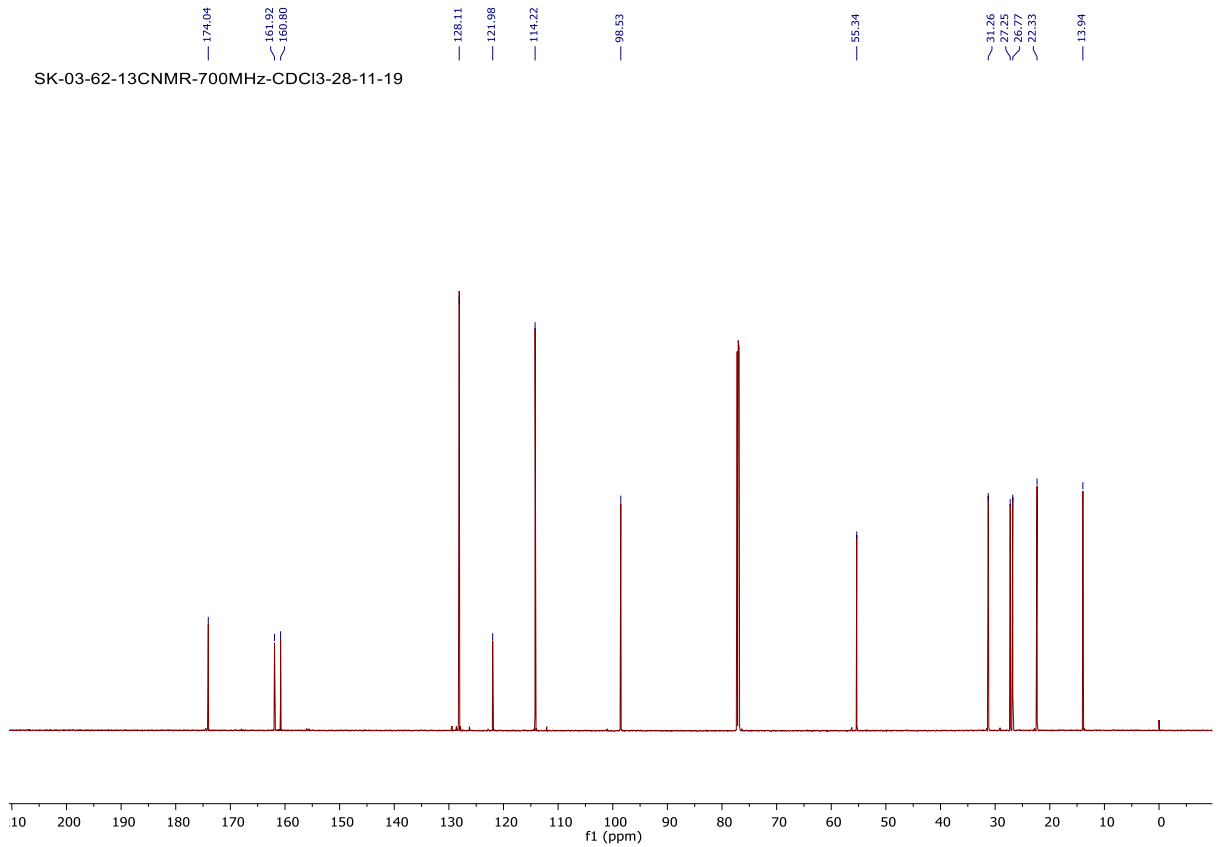

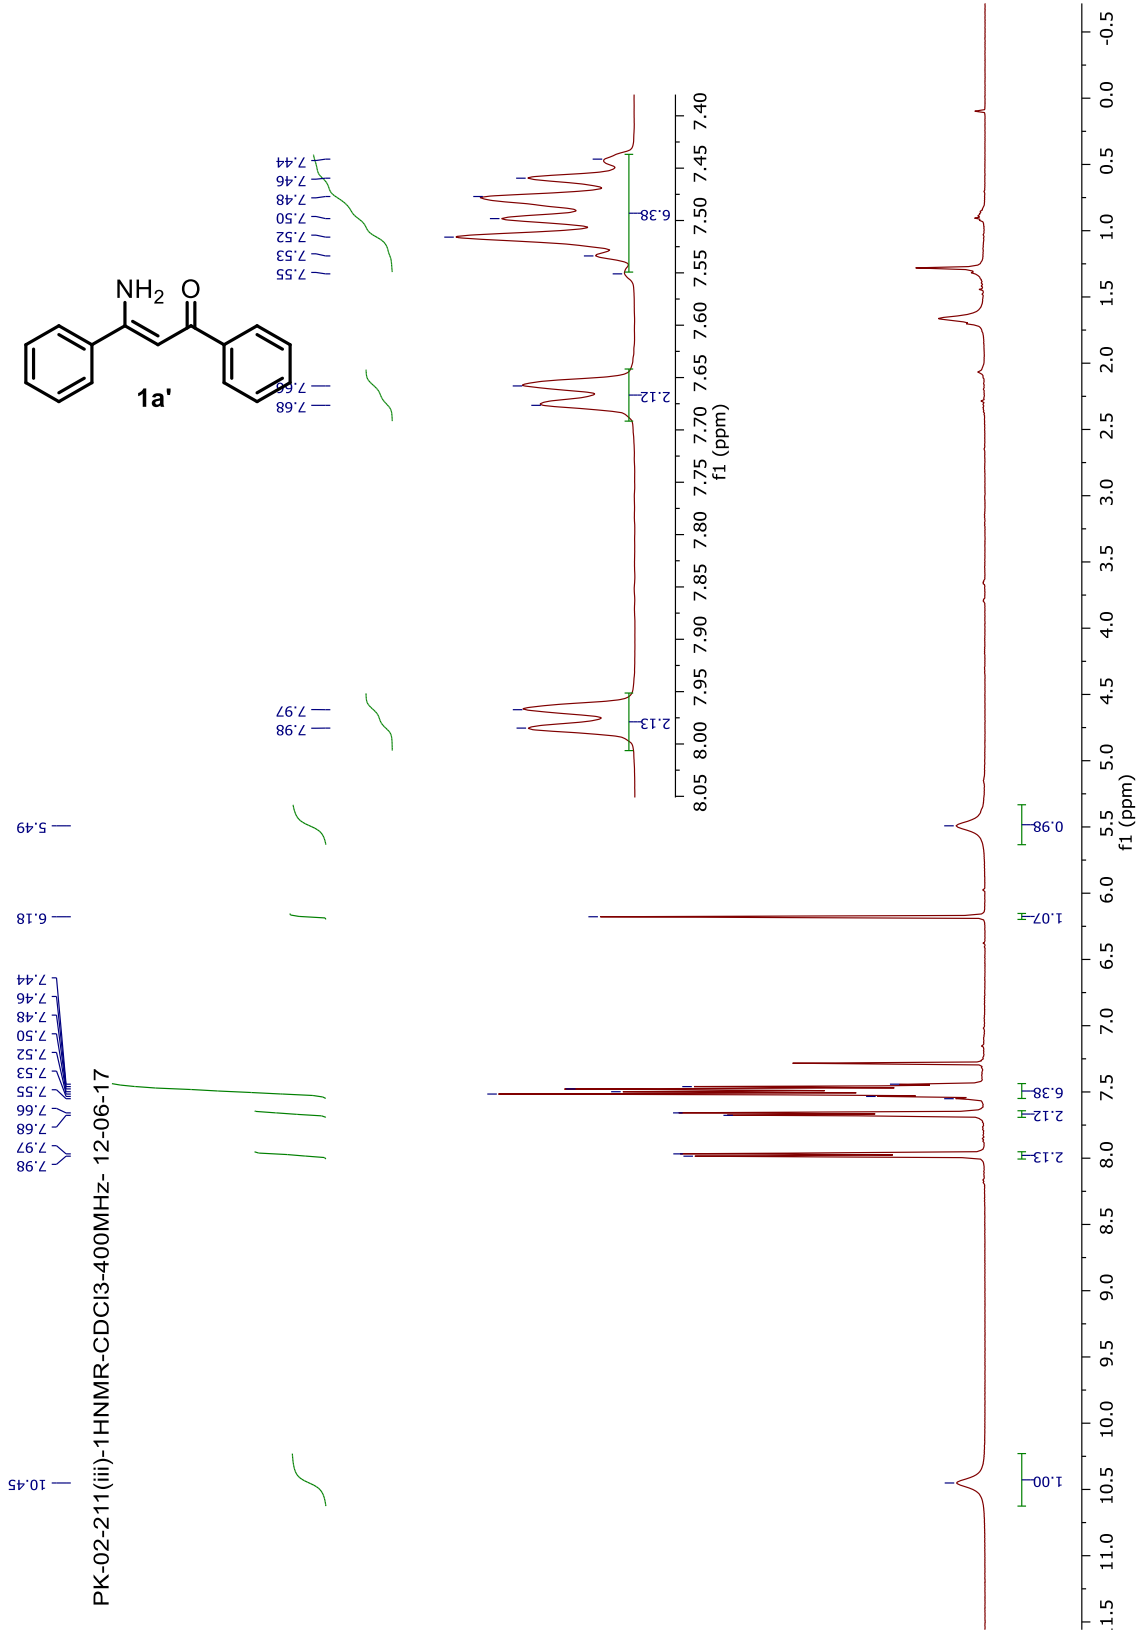

SK-02-163-1HNMR-400MHz-CDCl3-2-1-19

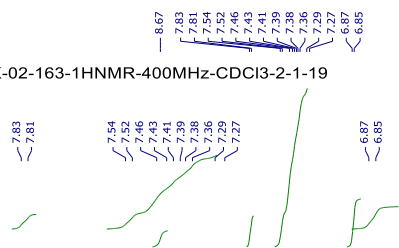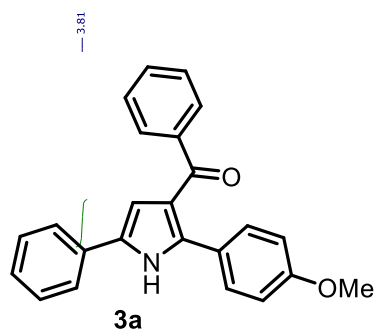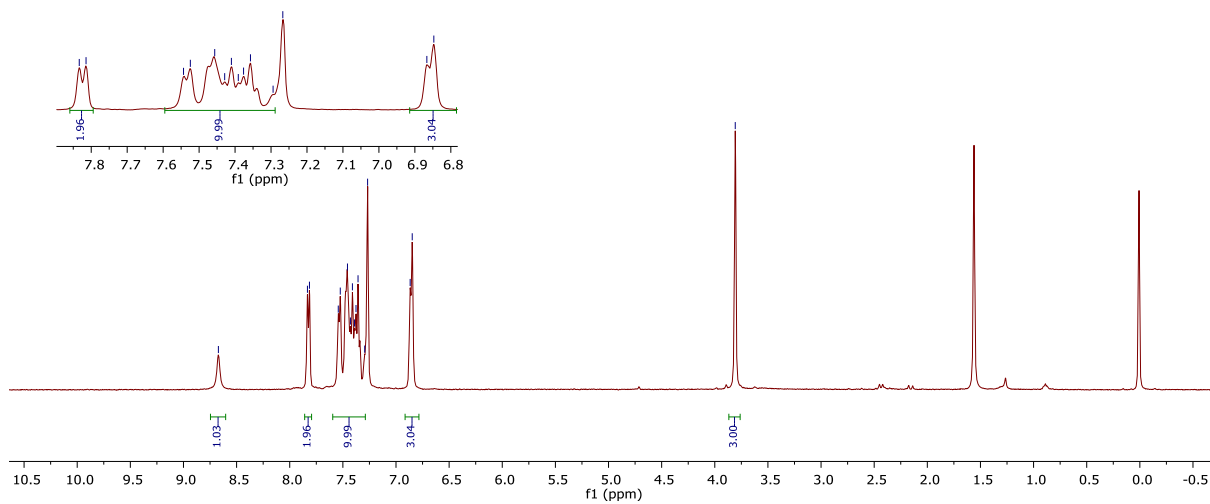

SK-02-163-13CNMR-500MHz-CDCl3-2-1-19

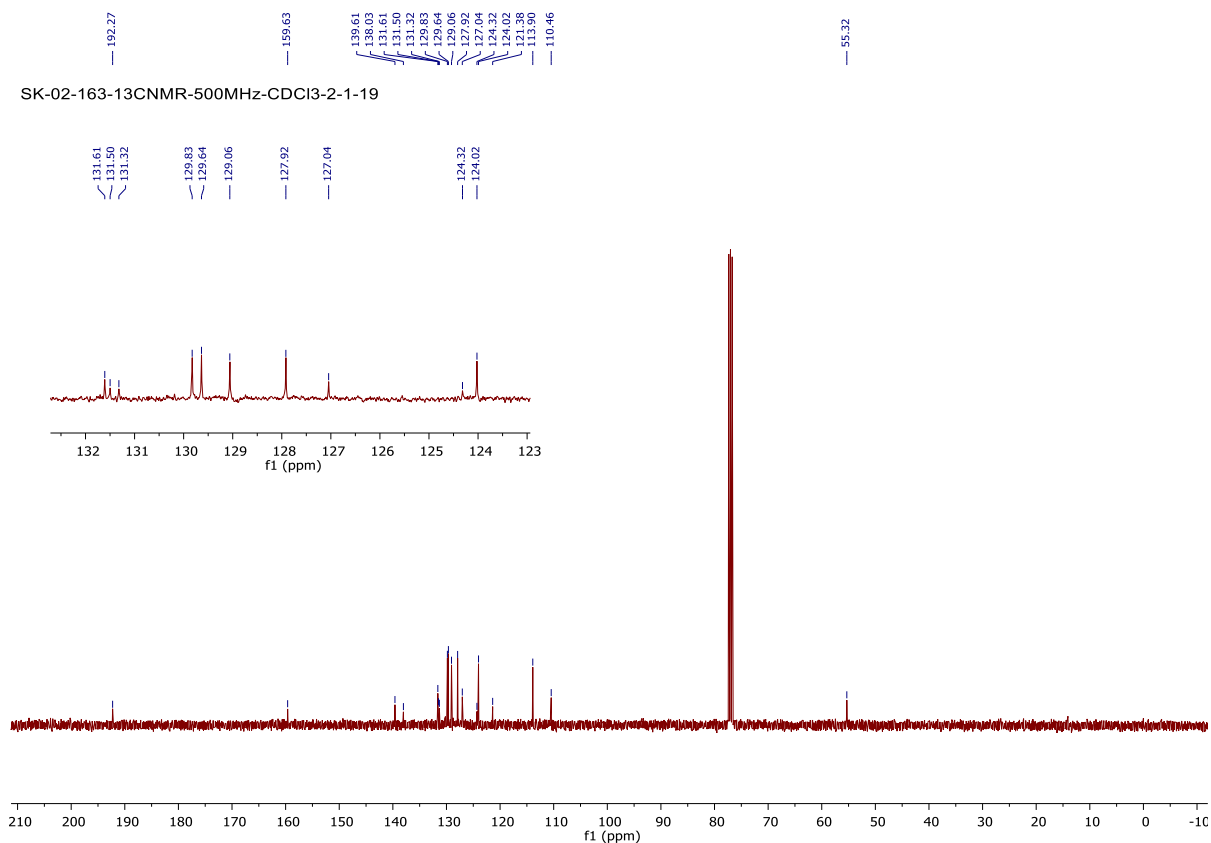

PK-06-857(5R)-1HNMR-400MHz-CDCl3-14-08-19

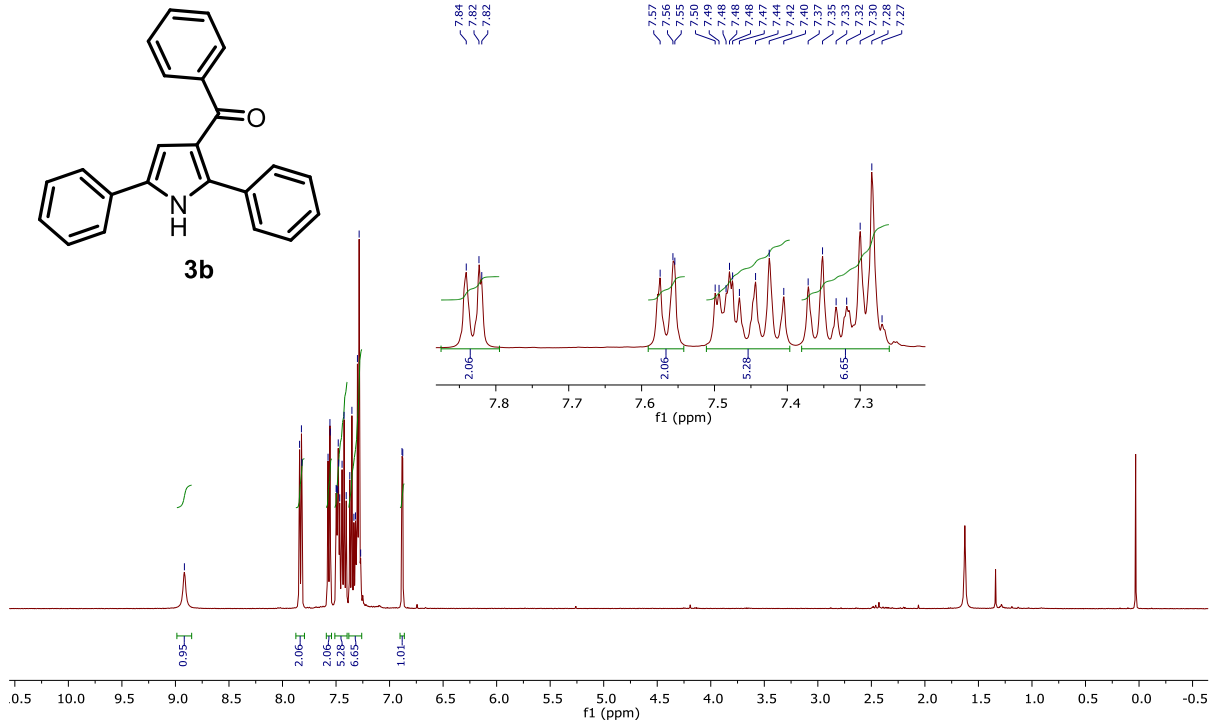

SK-02-267-1HNMR-500MHz-CDCl3-22-03-19

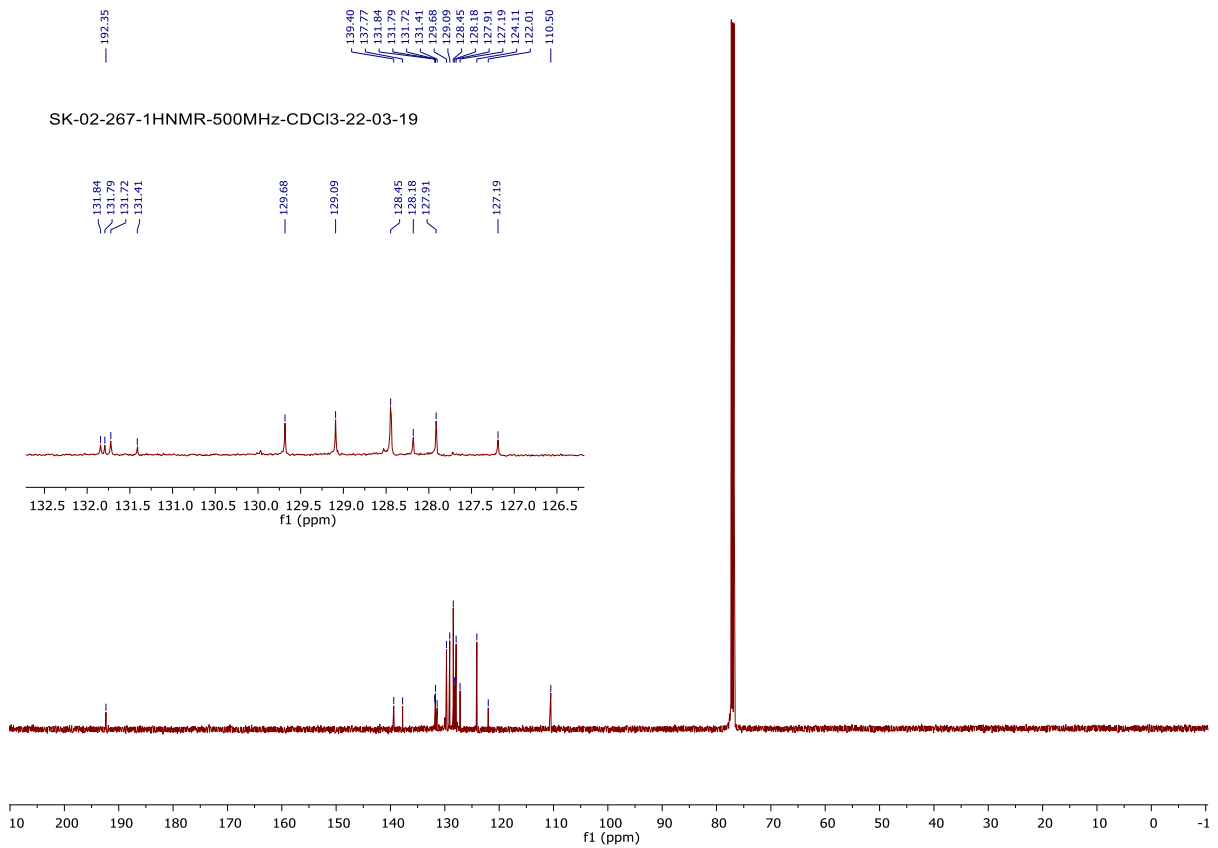

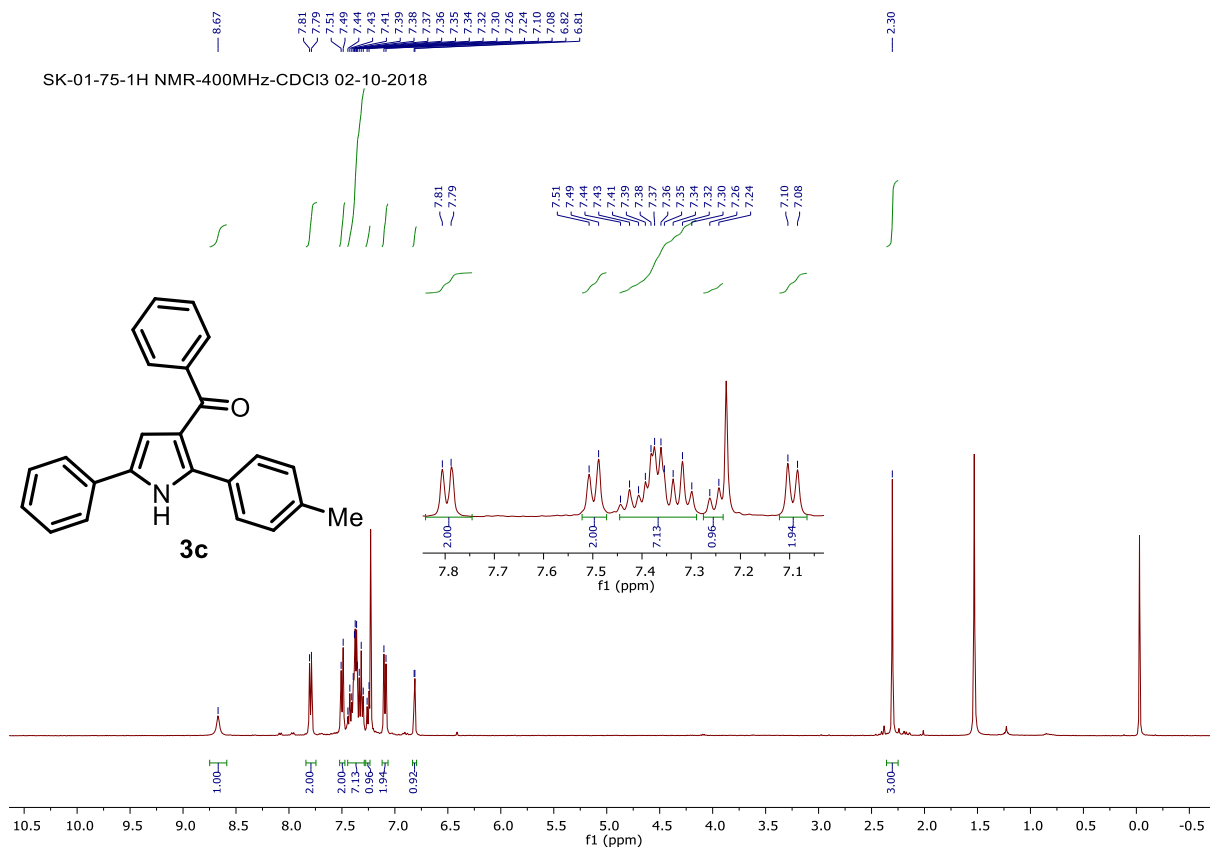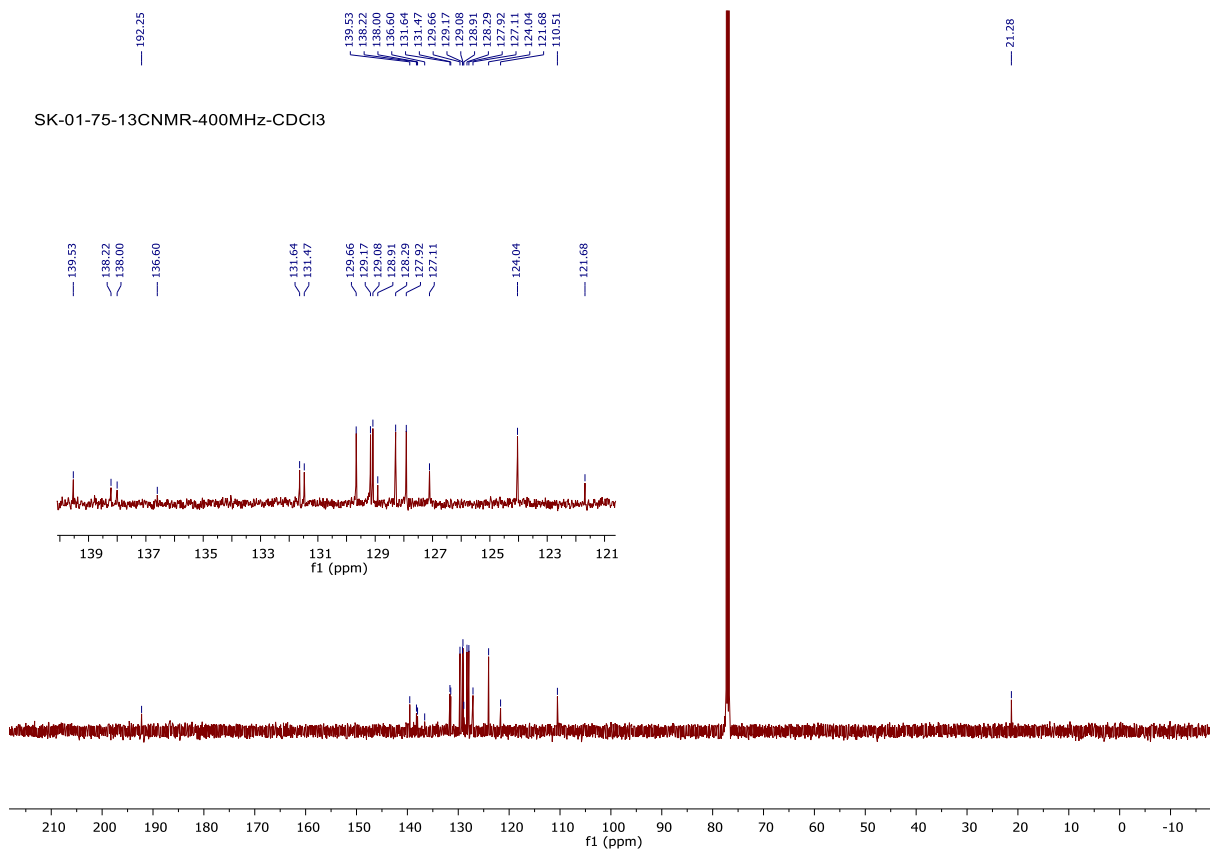

SK-02-327RR-1HNMR-400MHz-CDCl3-26-05-19

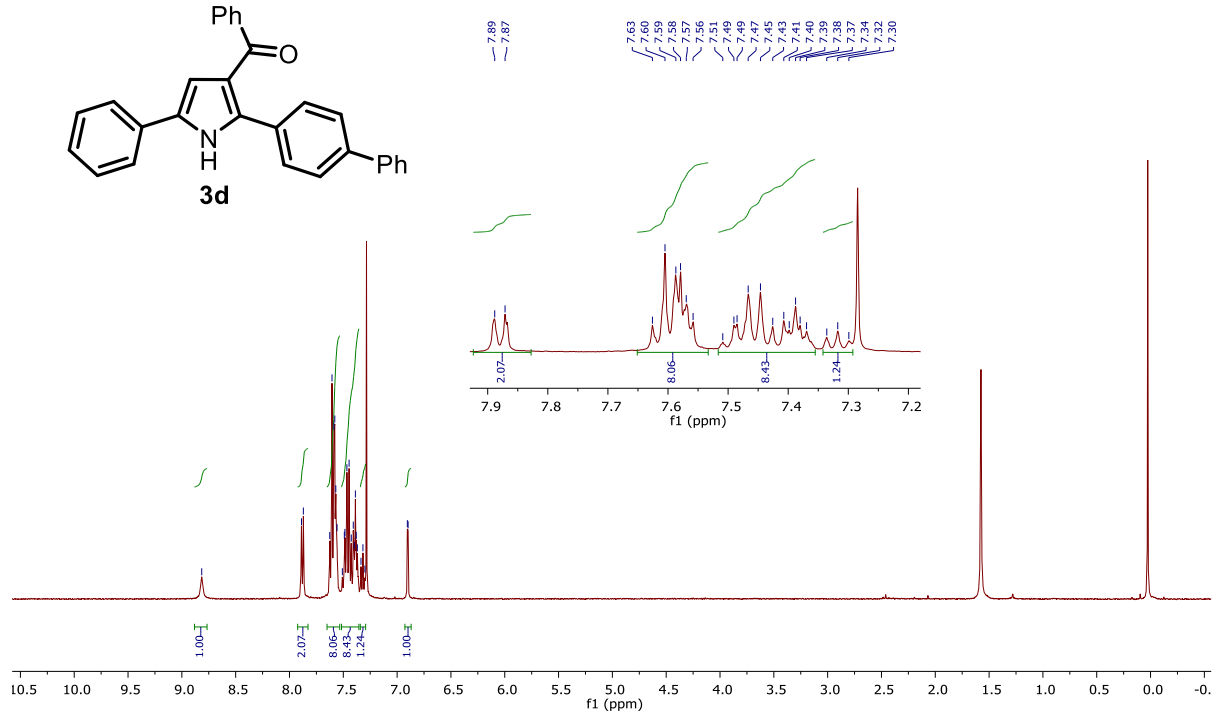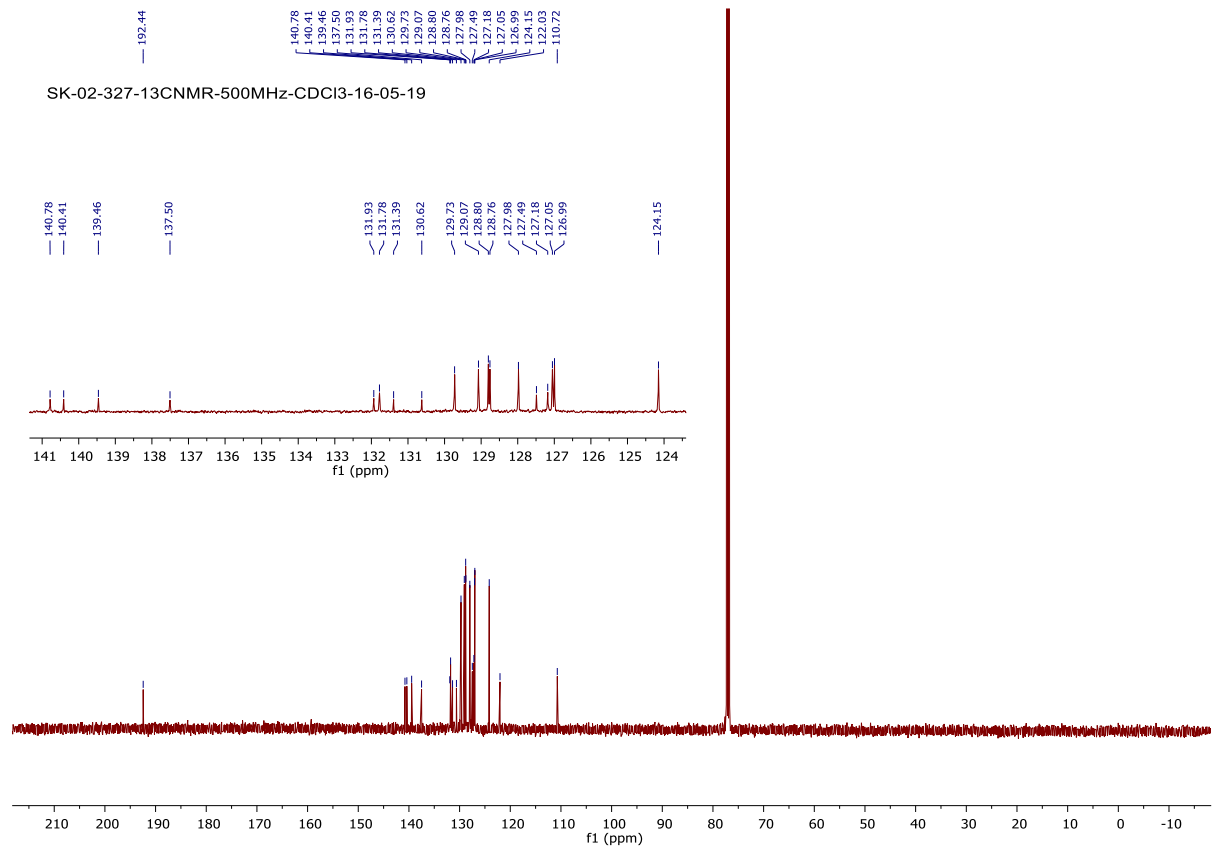

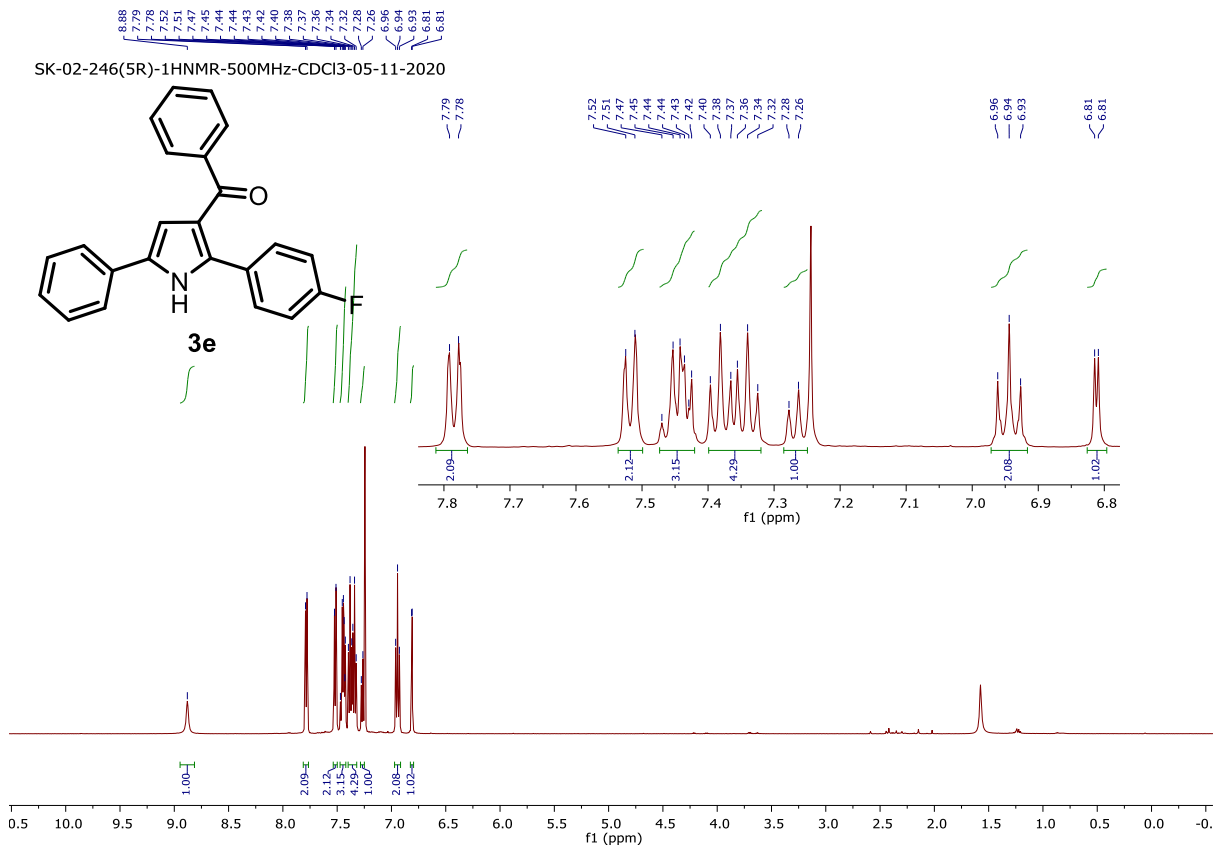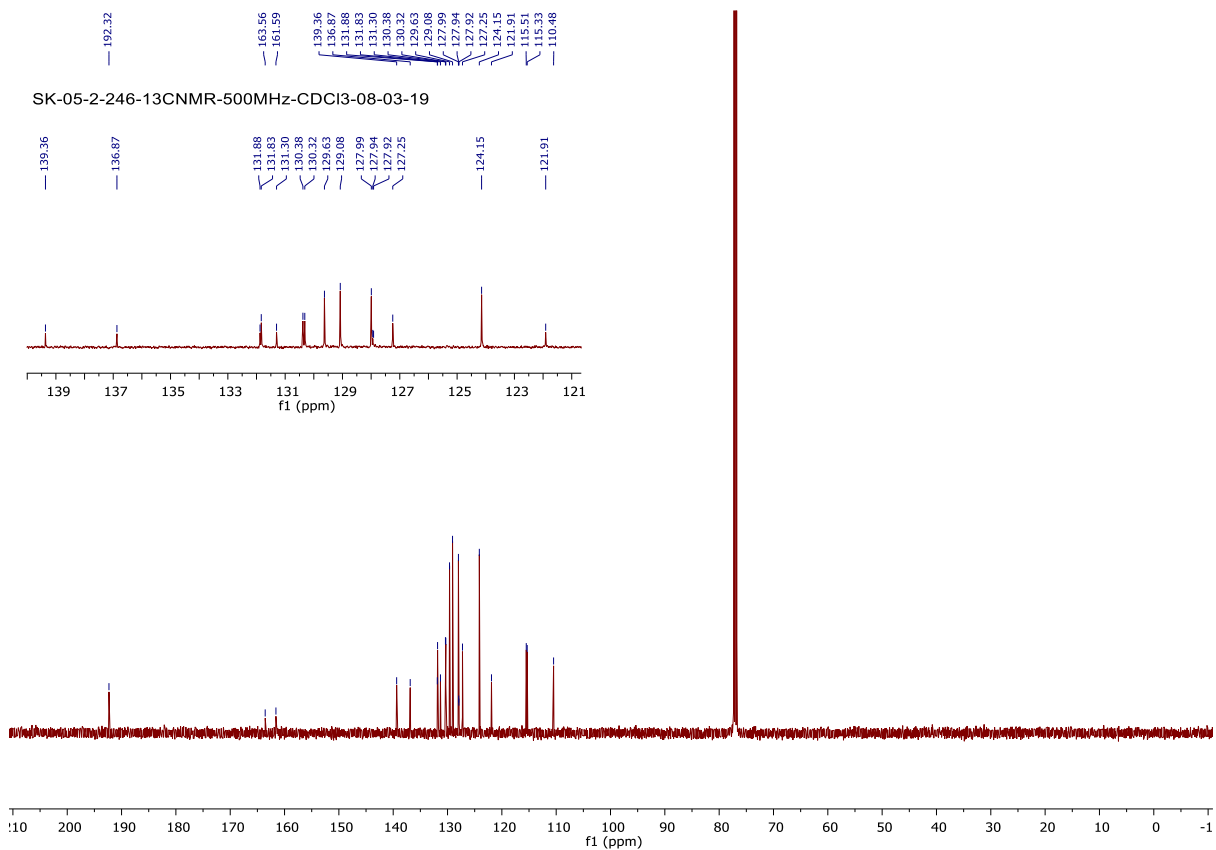

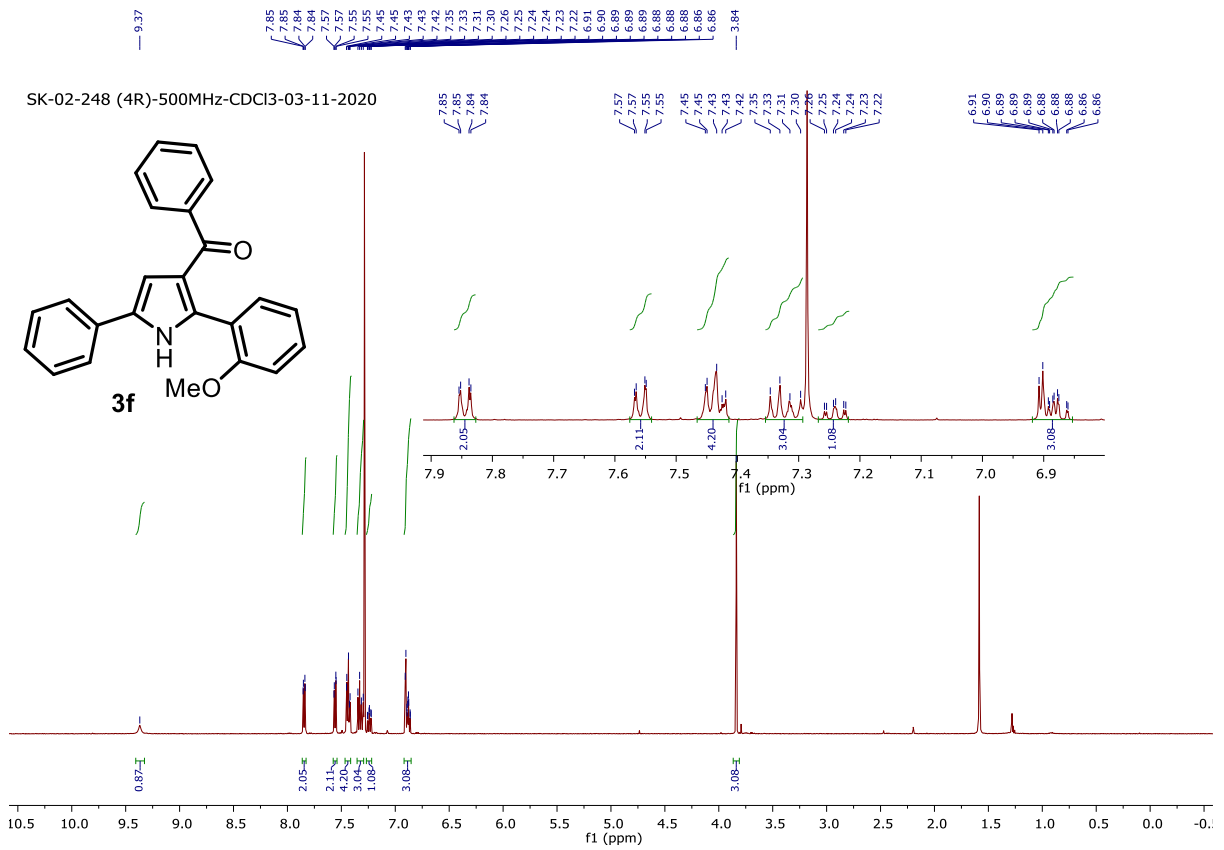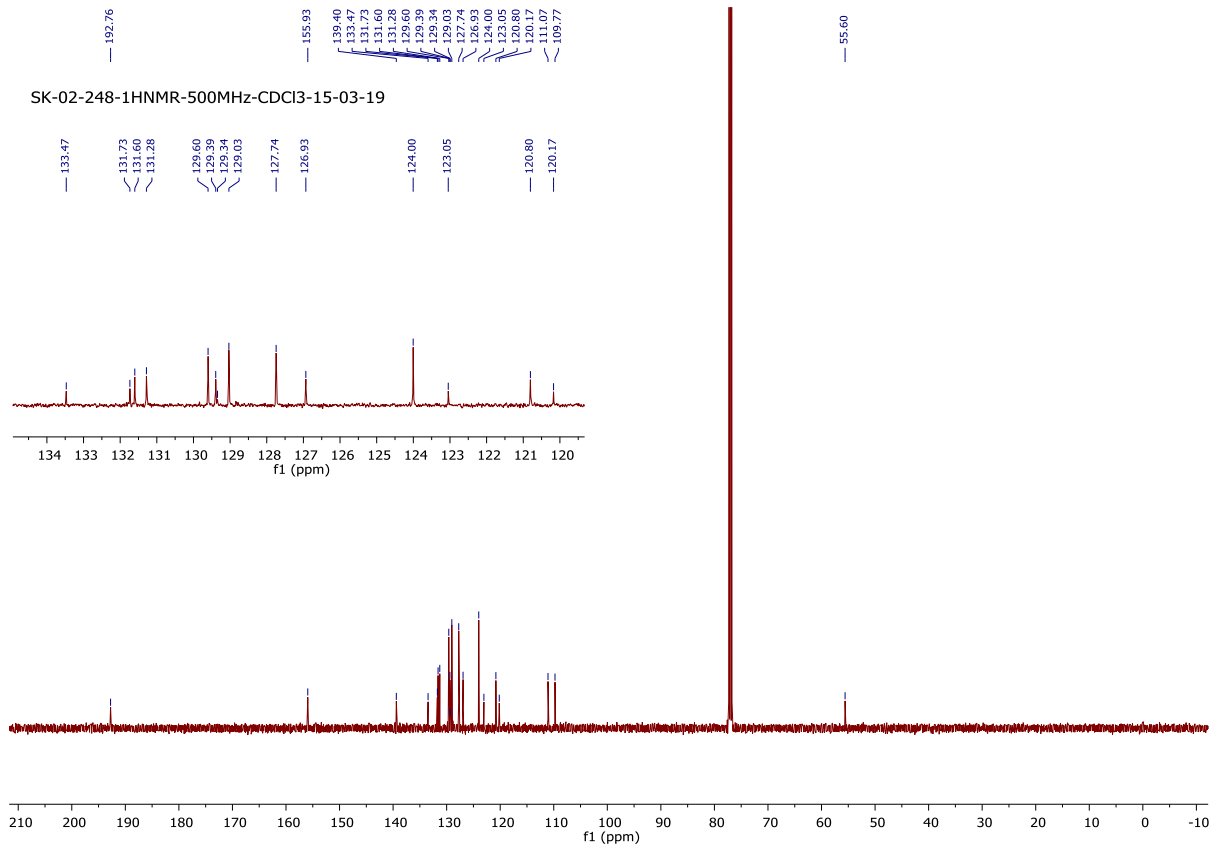



SK-02-245 (5R)-1HNMR-500MHz-CDCl3-09-11-2020

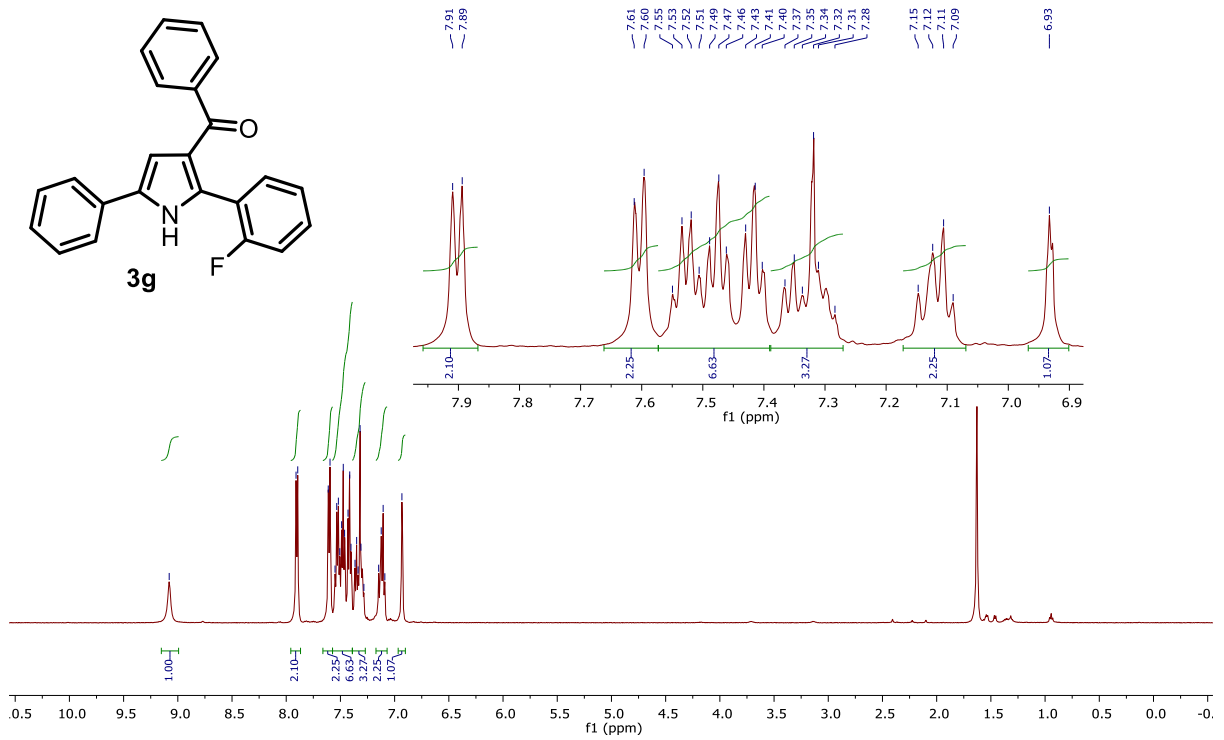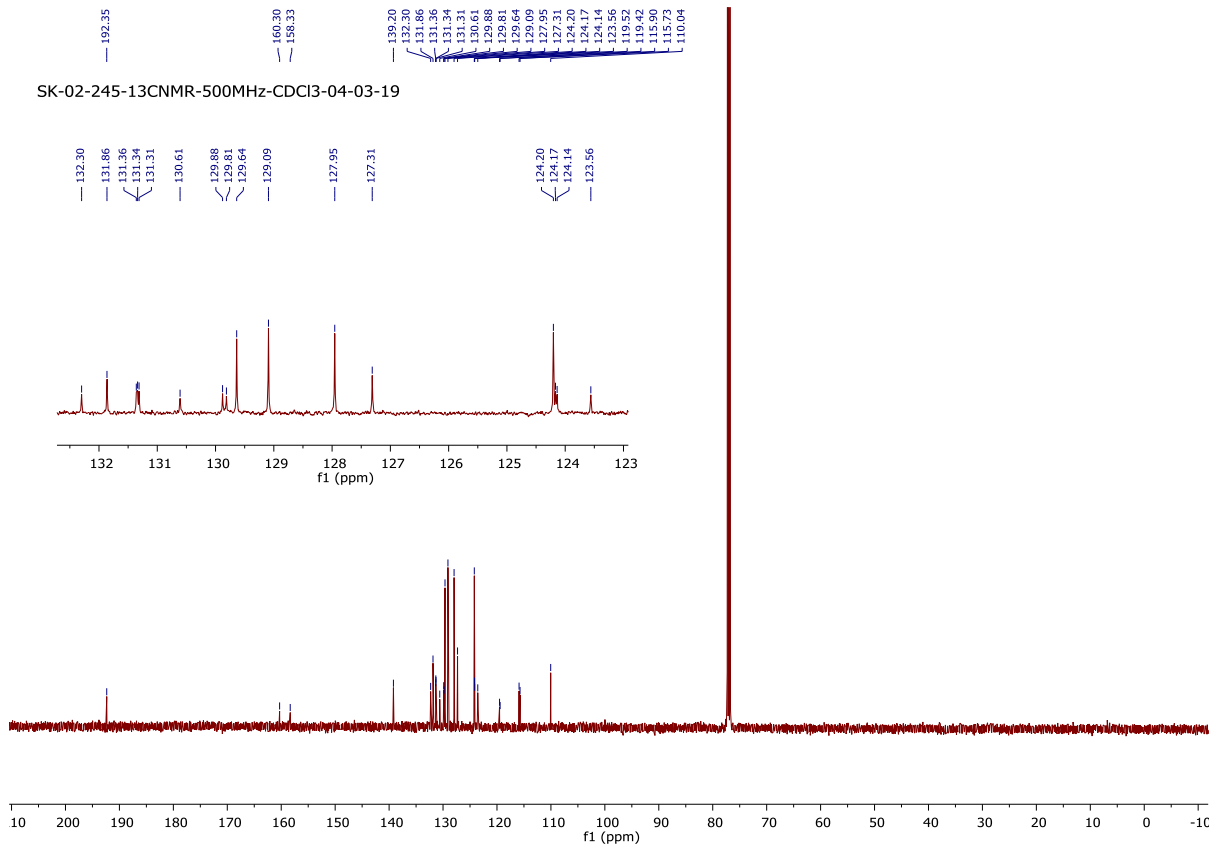

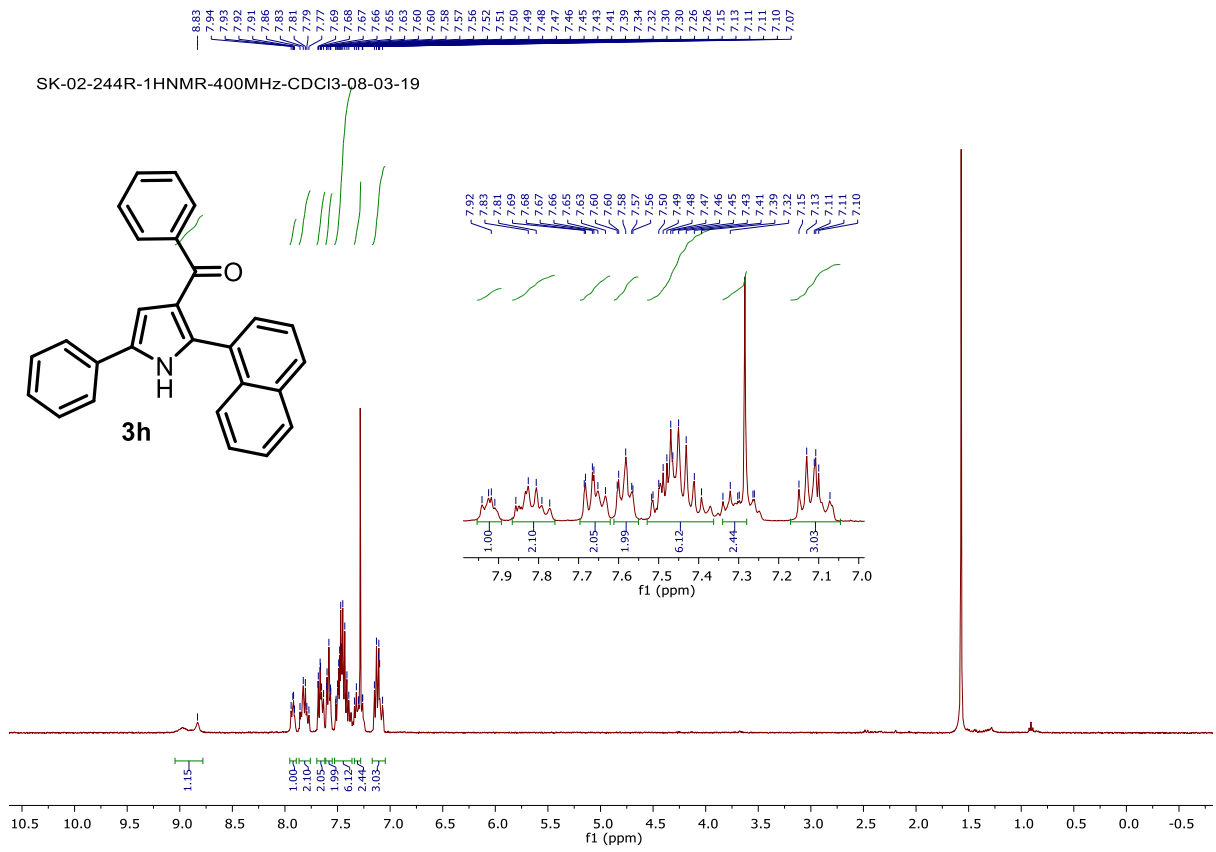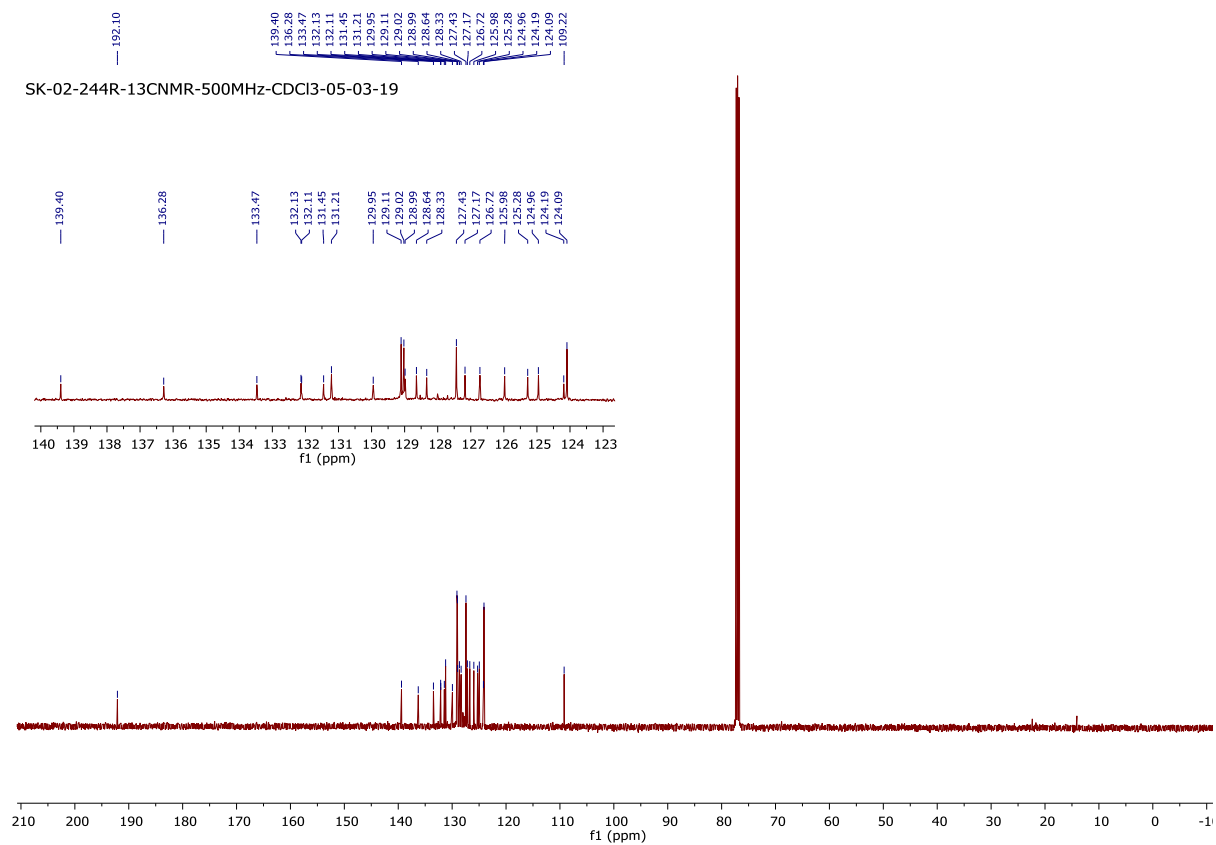

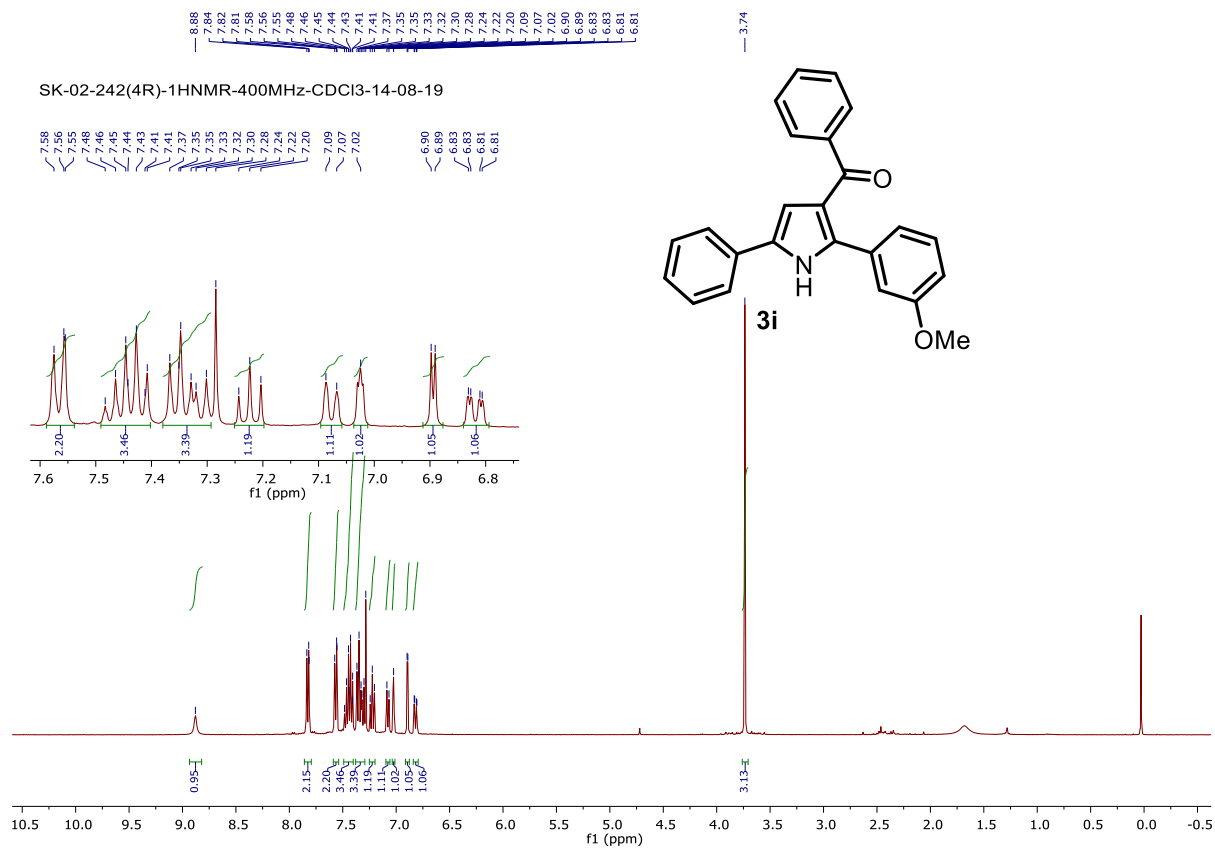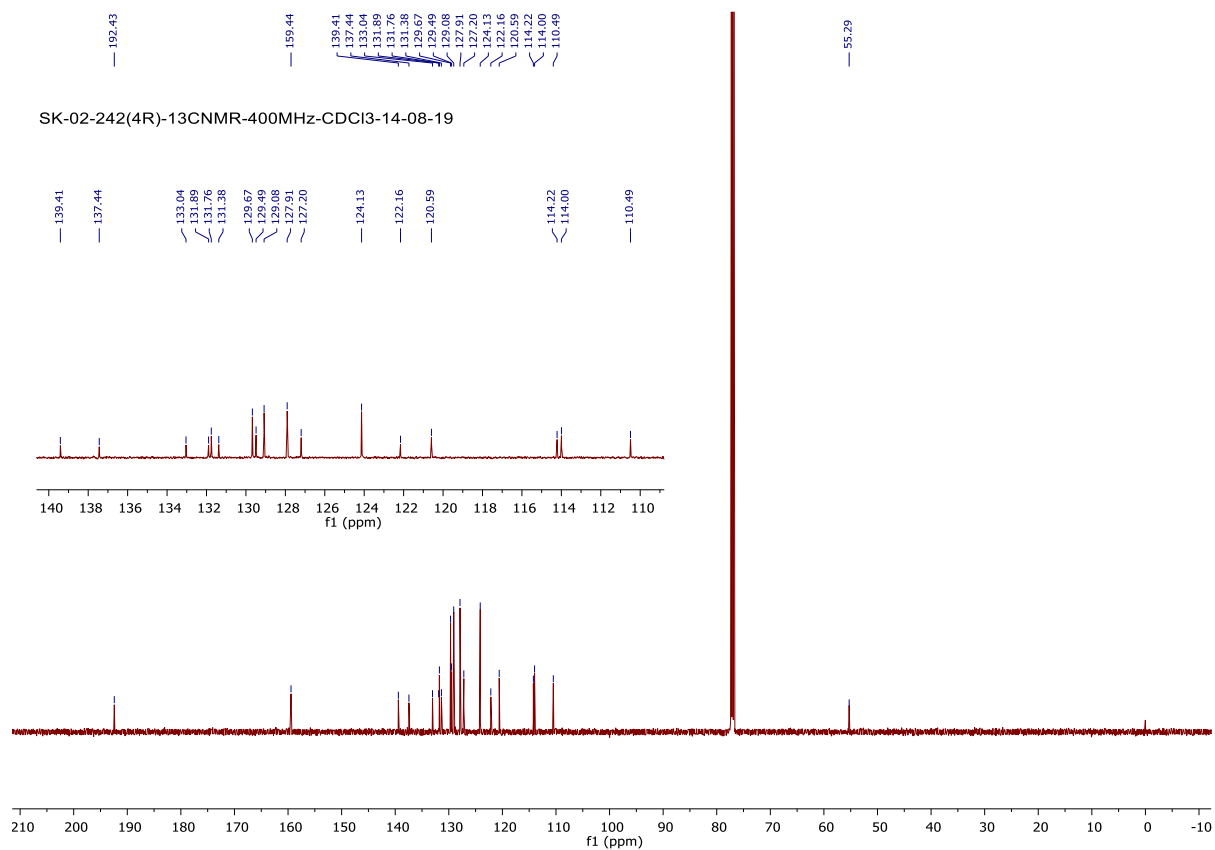

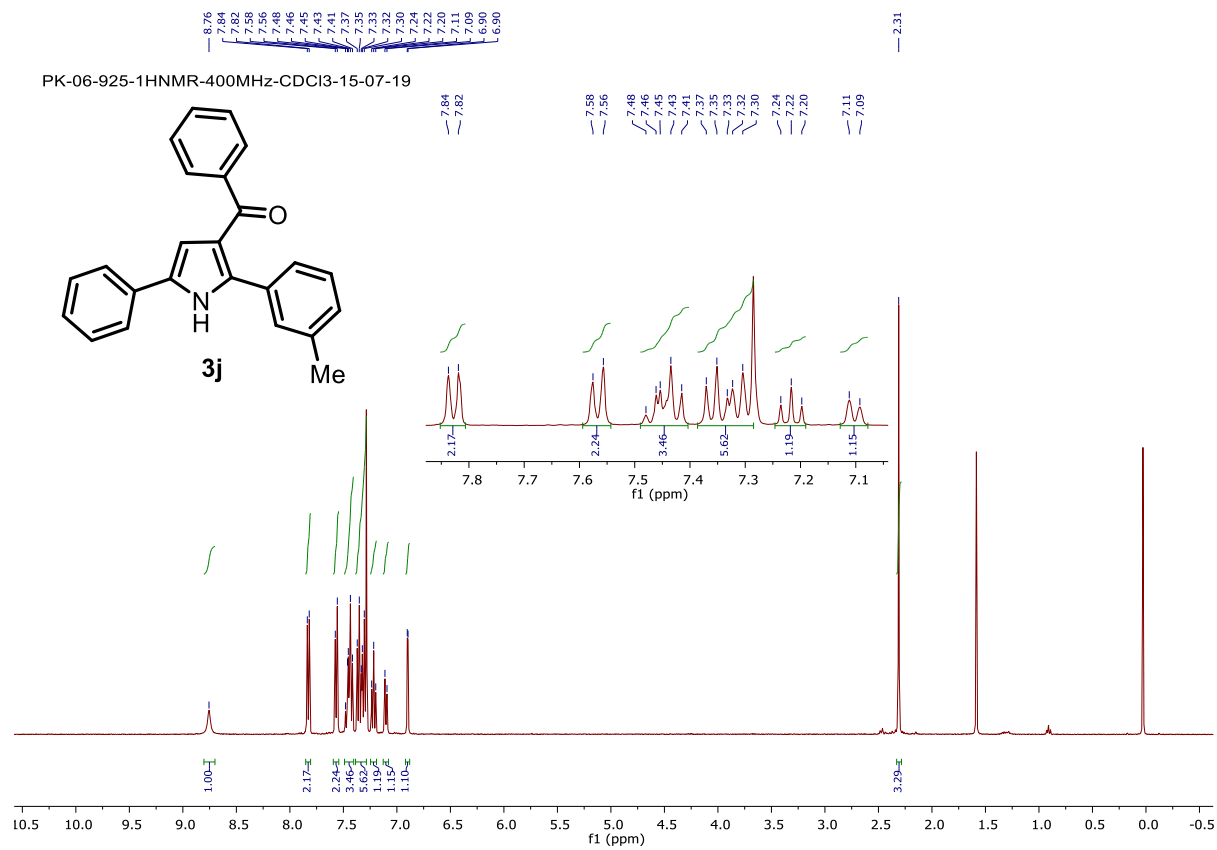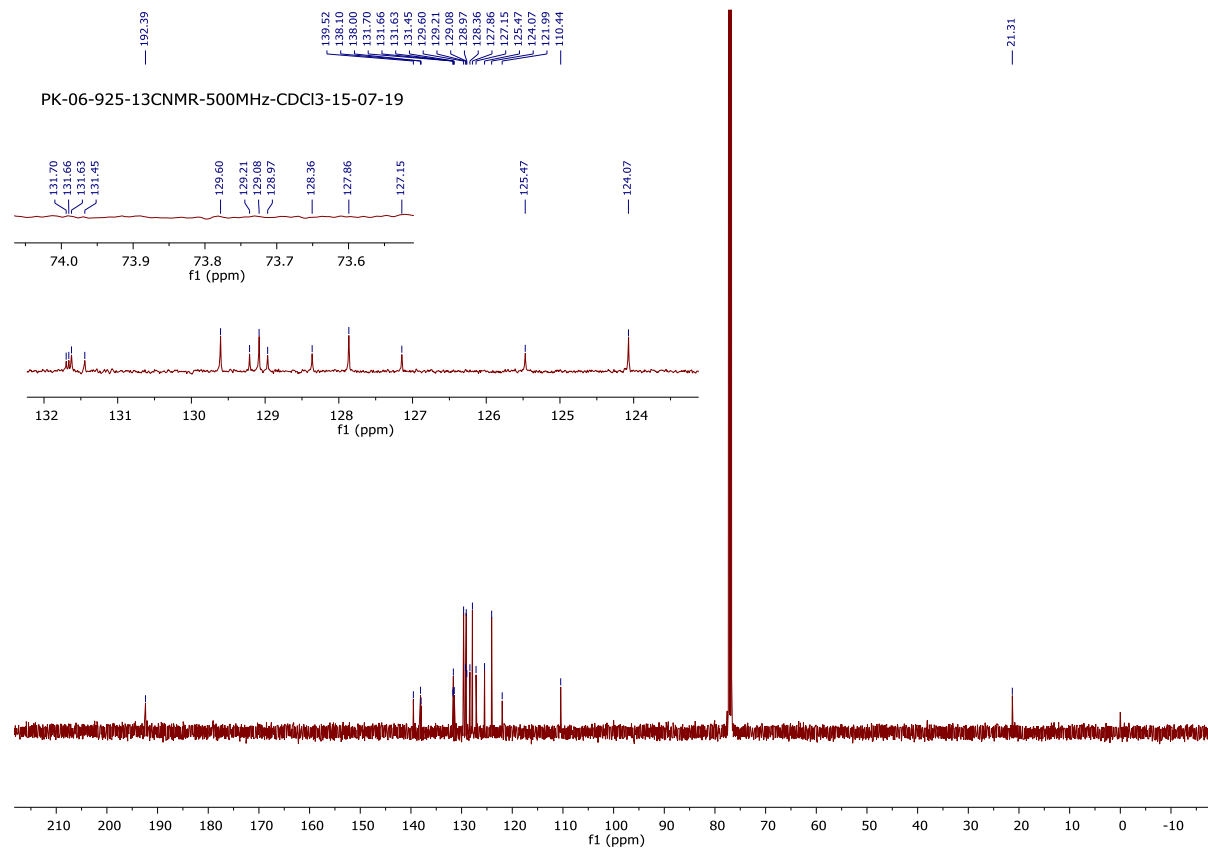

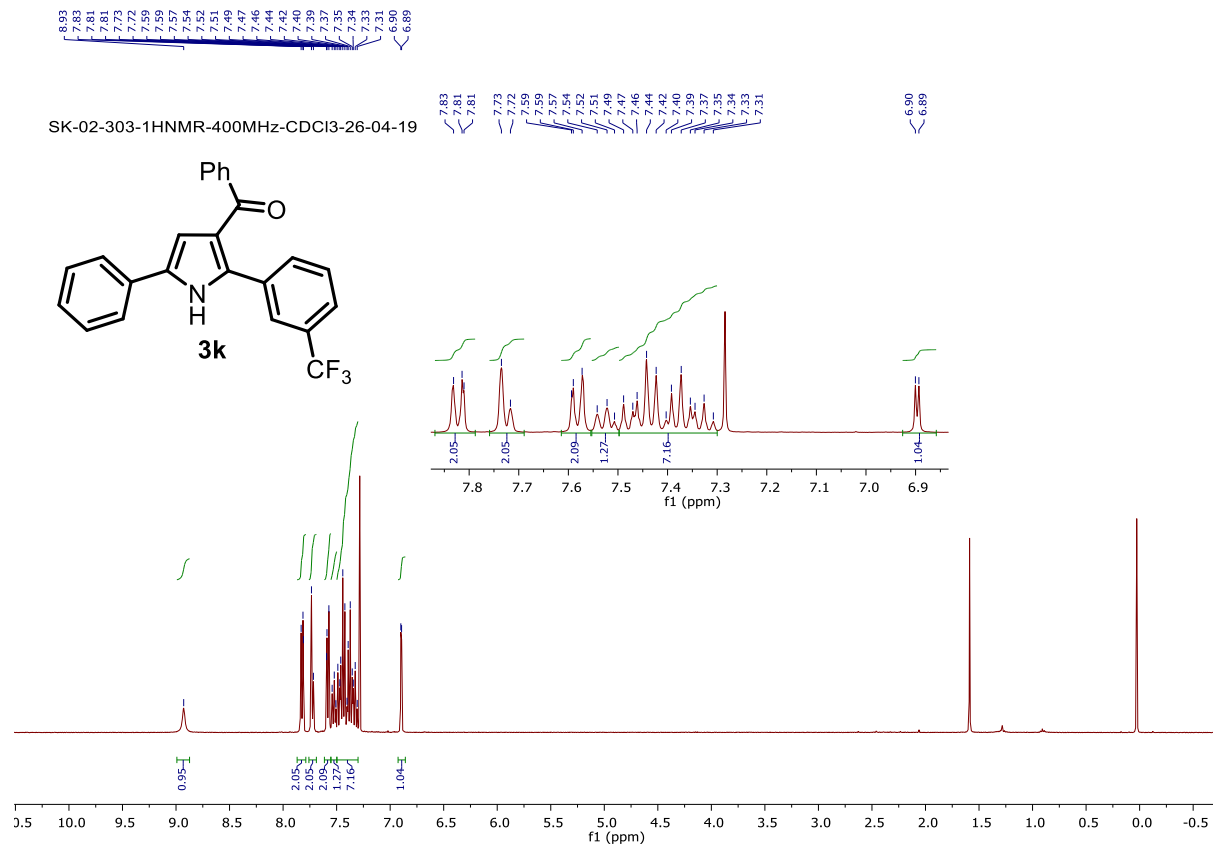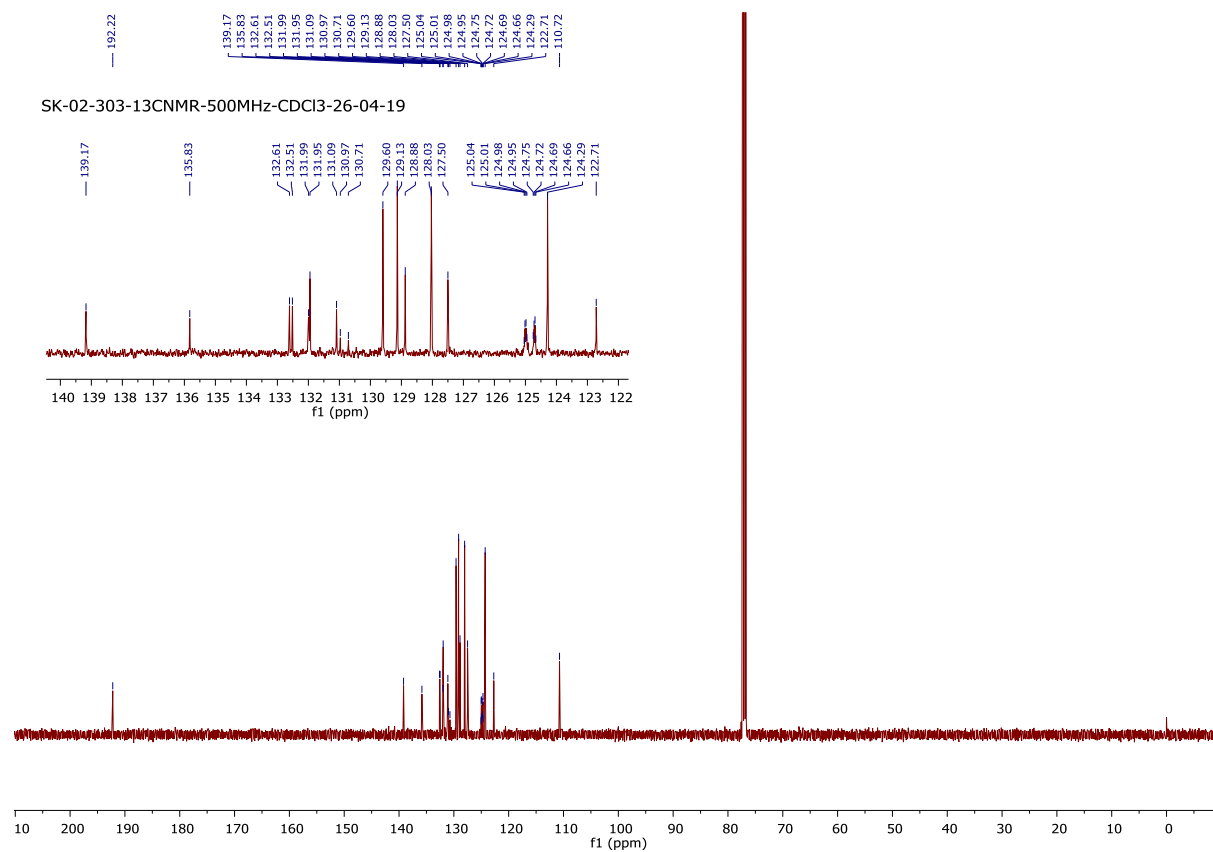

SK-02-305-1HNMR-400MHz-CDCl3-27-04-19

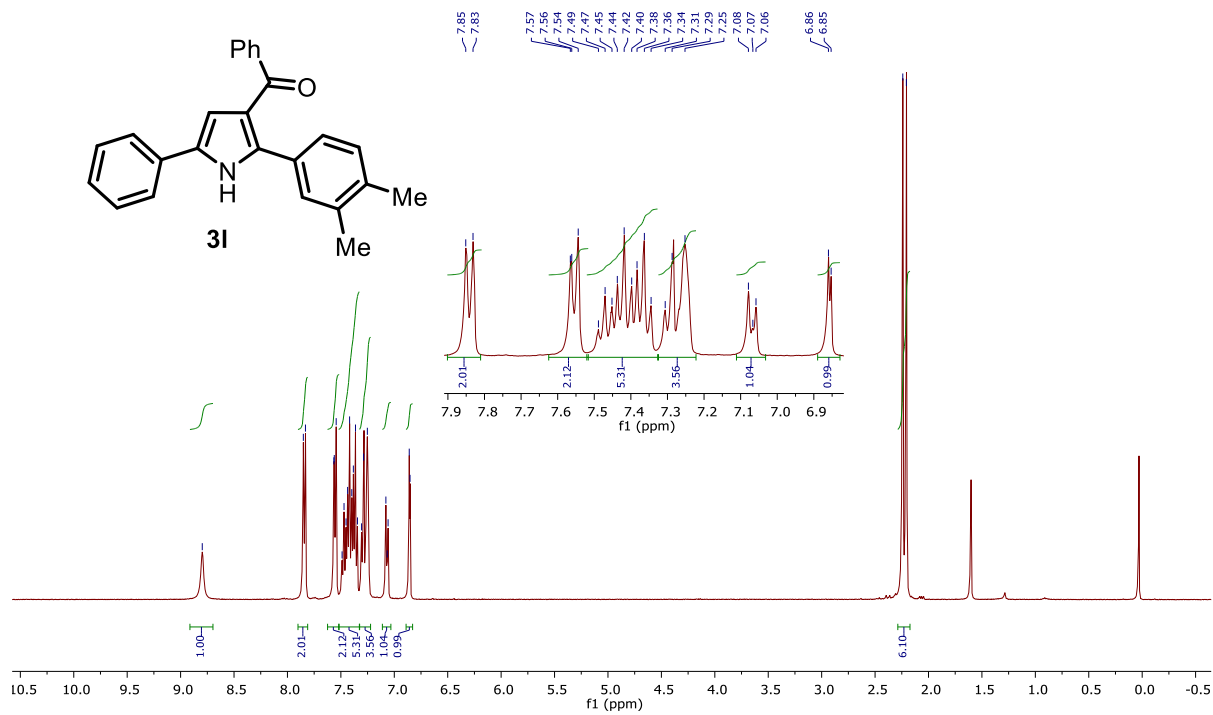

SK-02-305-13CNMR-500MHz-CDCl3-27-04-19

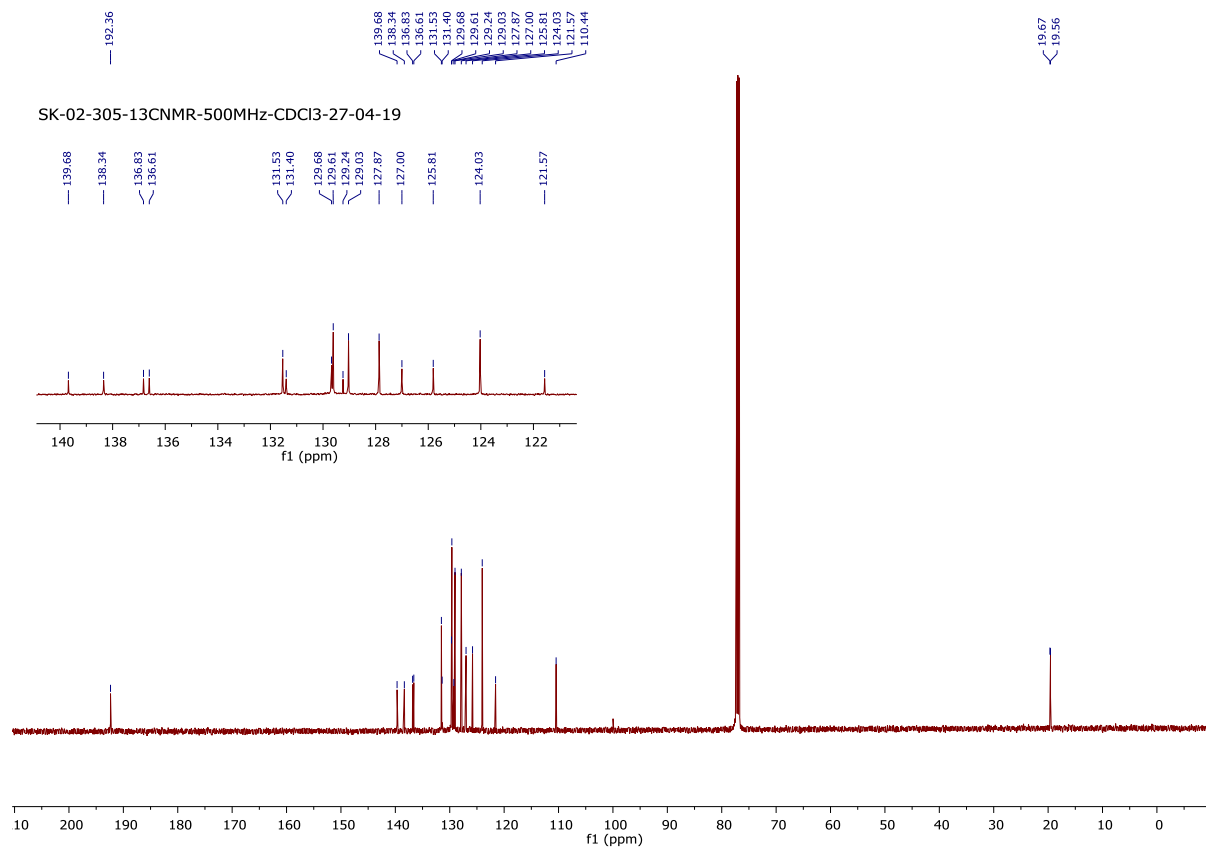

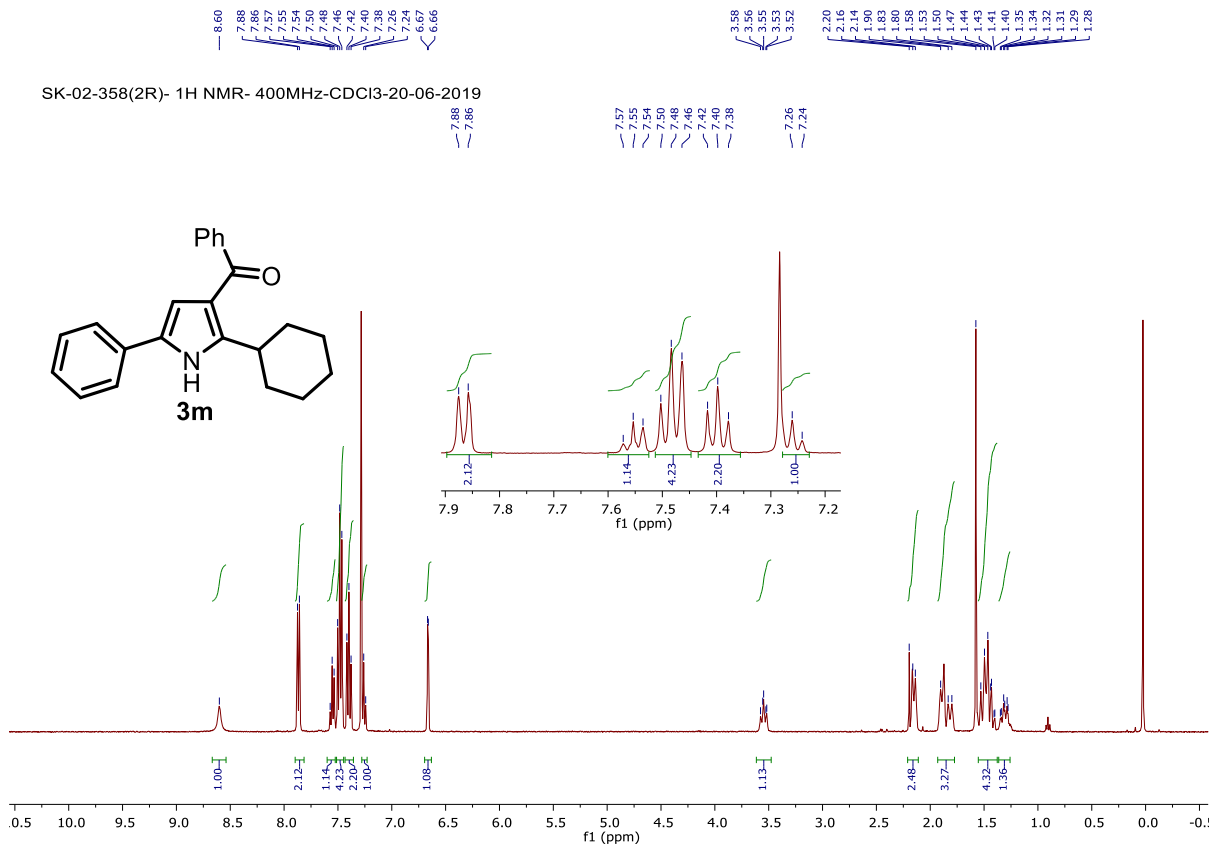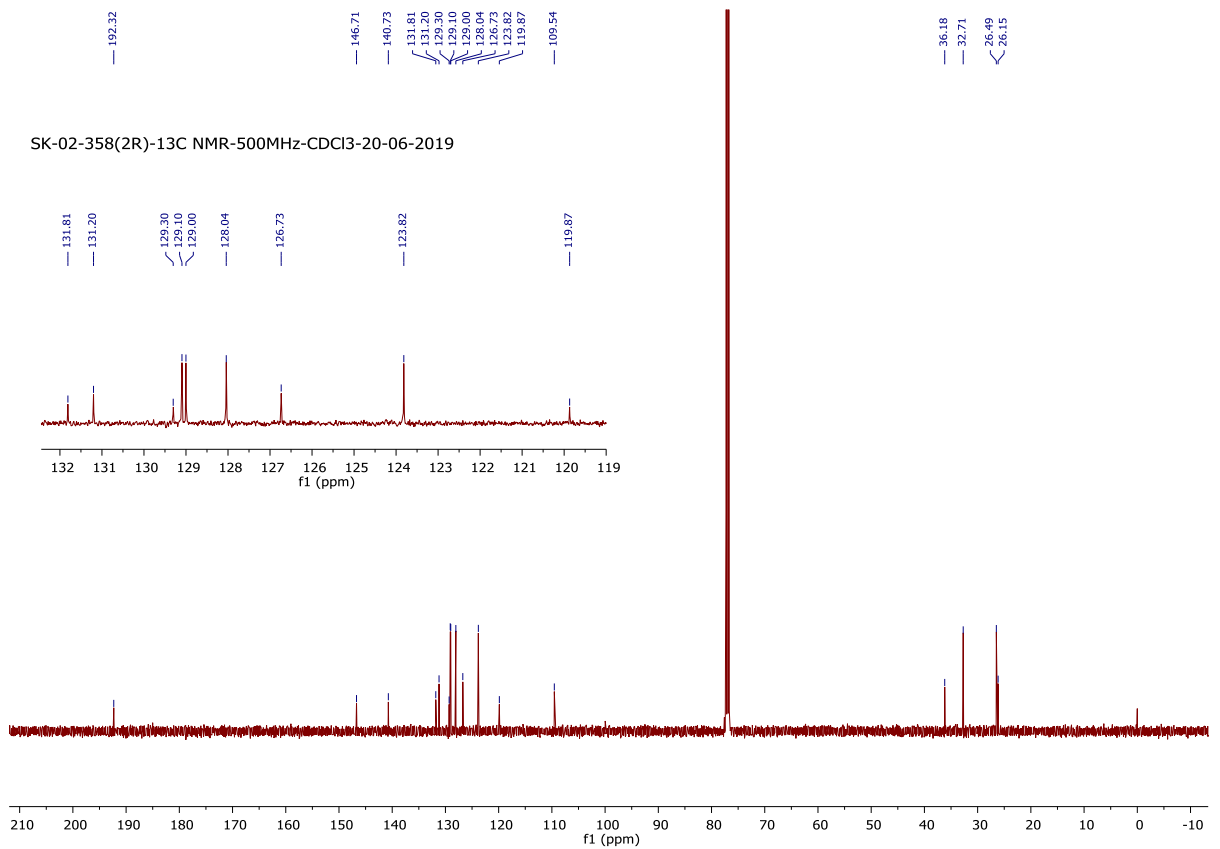

SK-02-313(R)-1HNMR-400MHz-CDCl3-28-08-2019

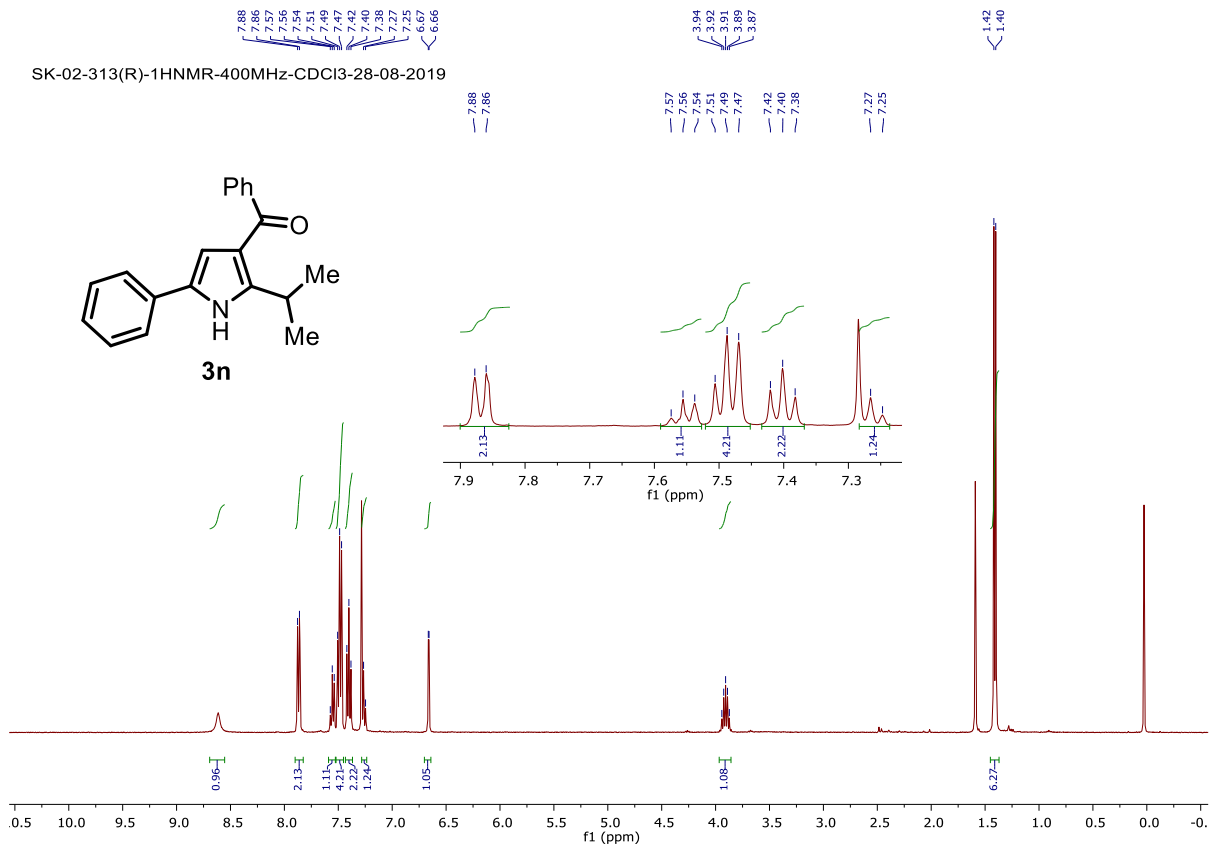

SK-02-313-13CNMR-500MHz-CDCl3-03-05-2019

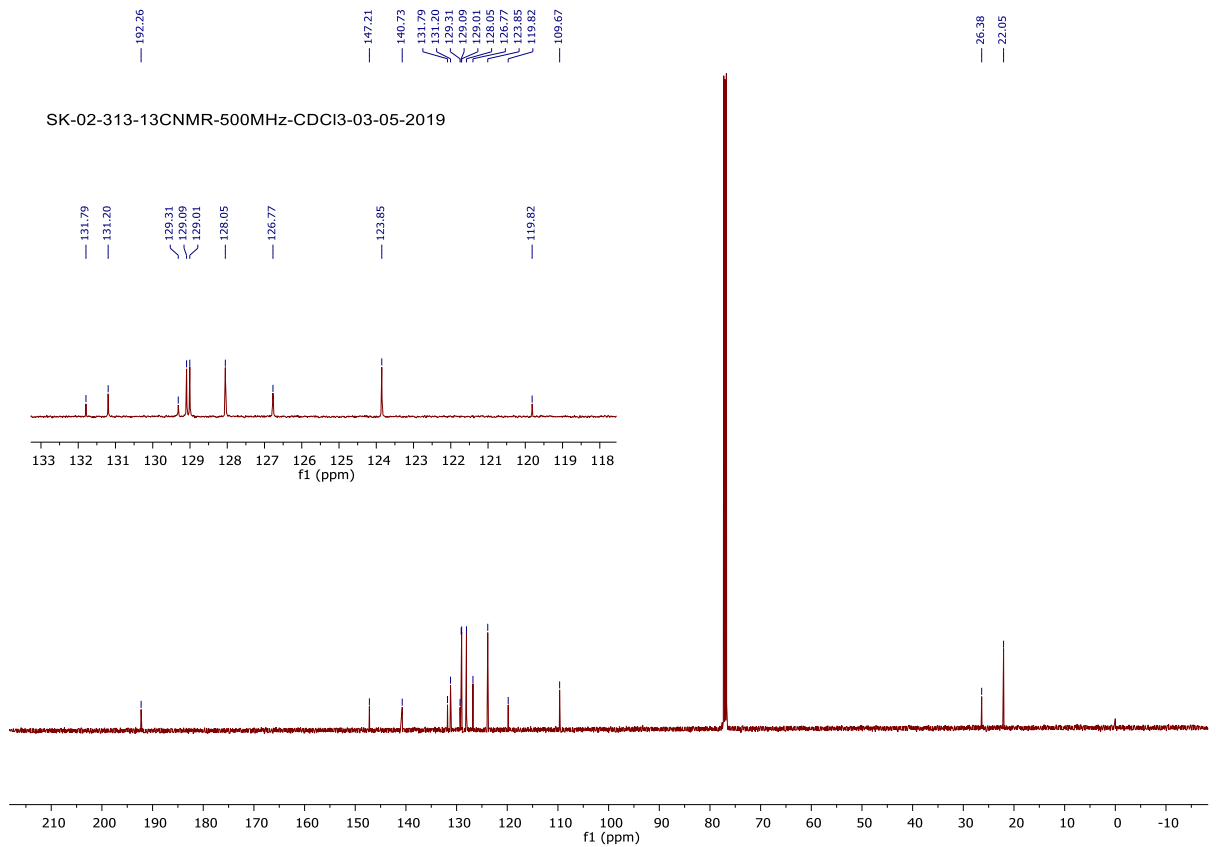



SK-03-318(4R)-1HNMR-400MHZ-CDCl3-19-08-2019

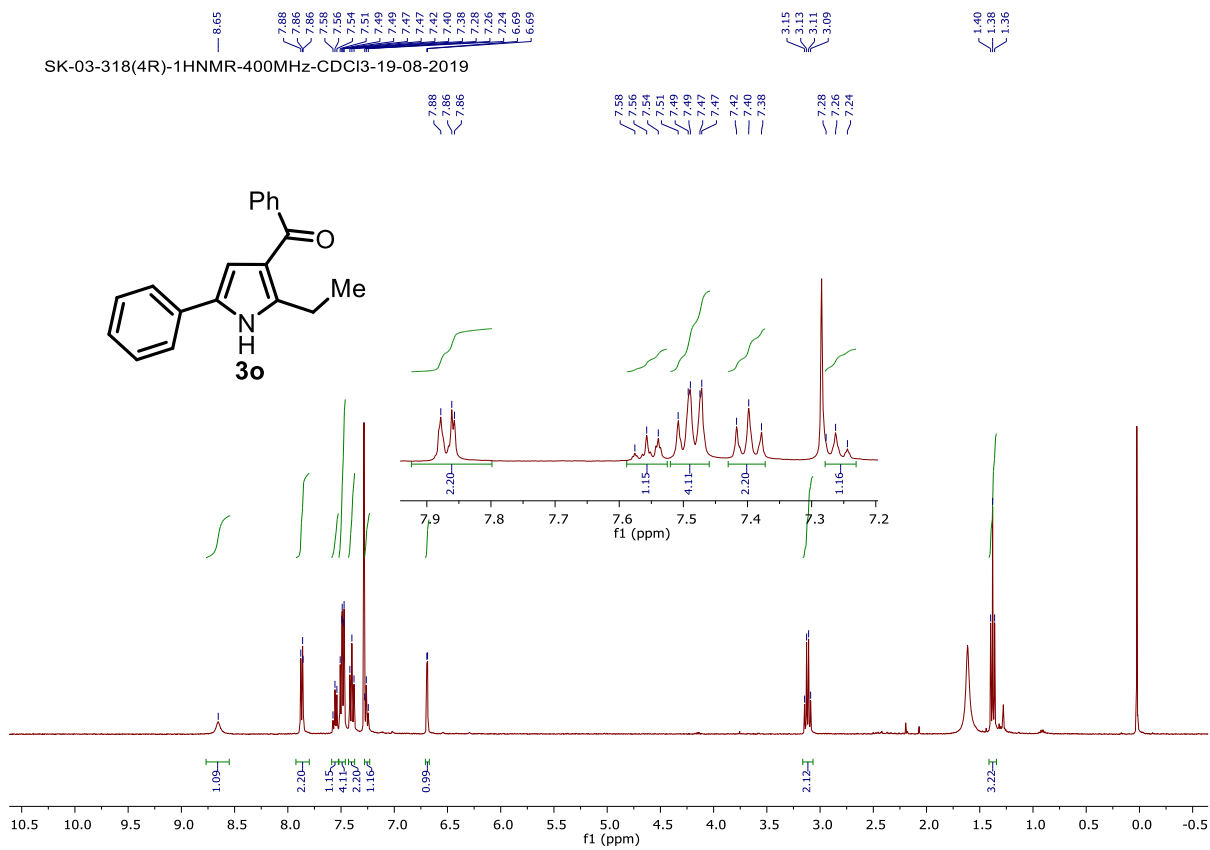

SK-03-18-13C-NMR-500MHZ-CDCl3-10-08-2019

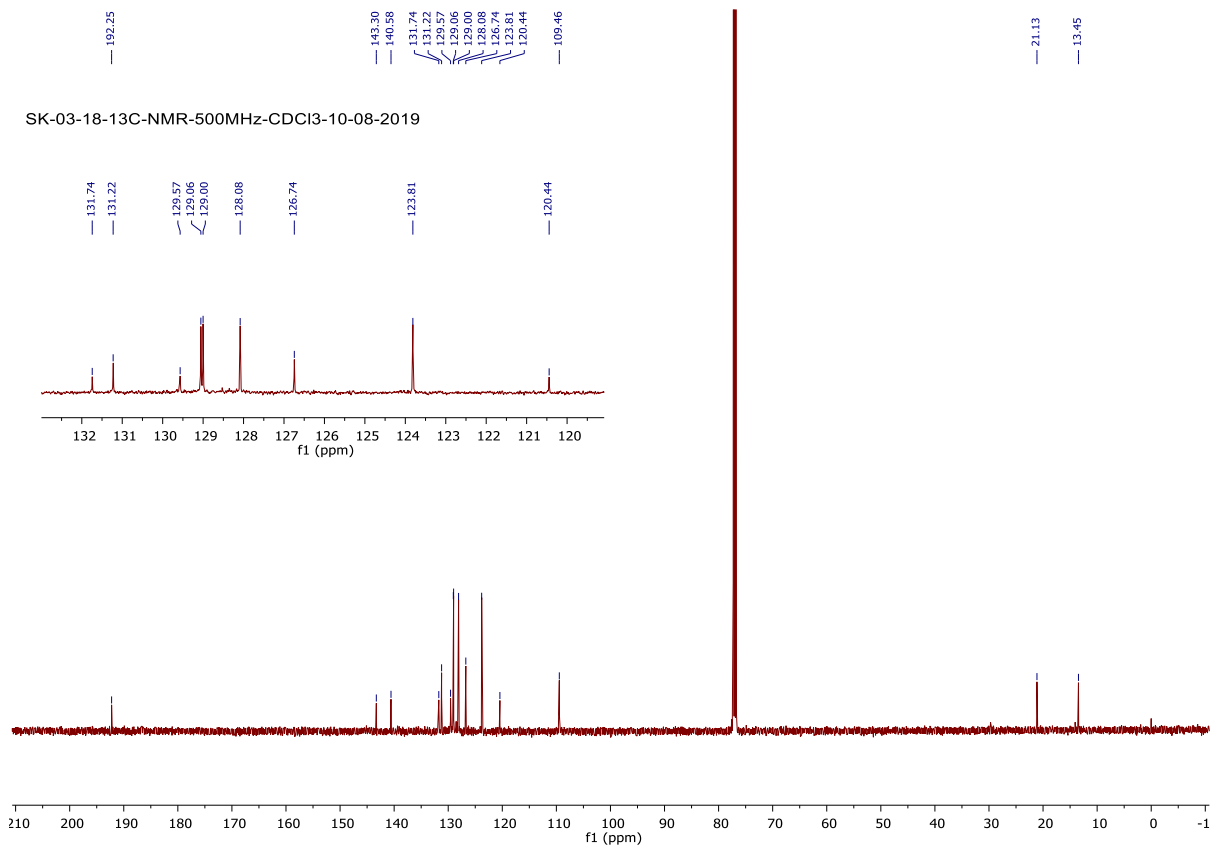

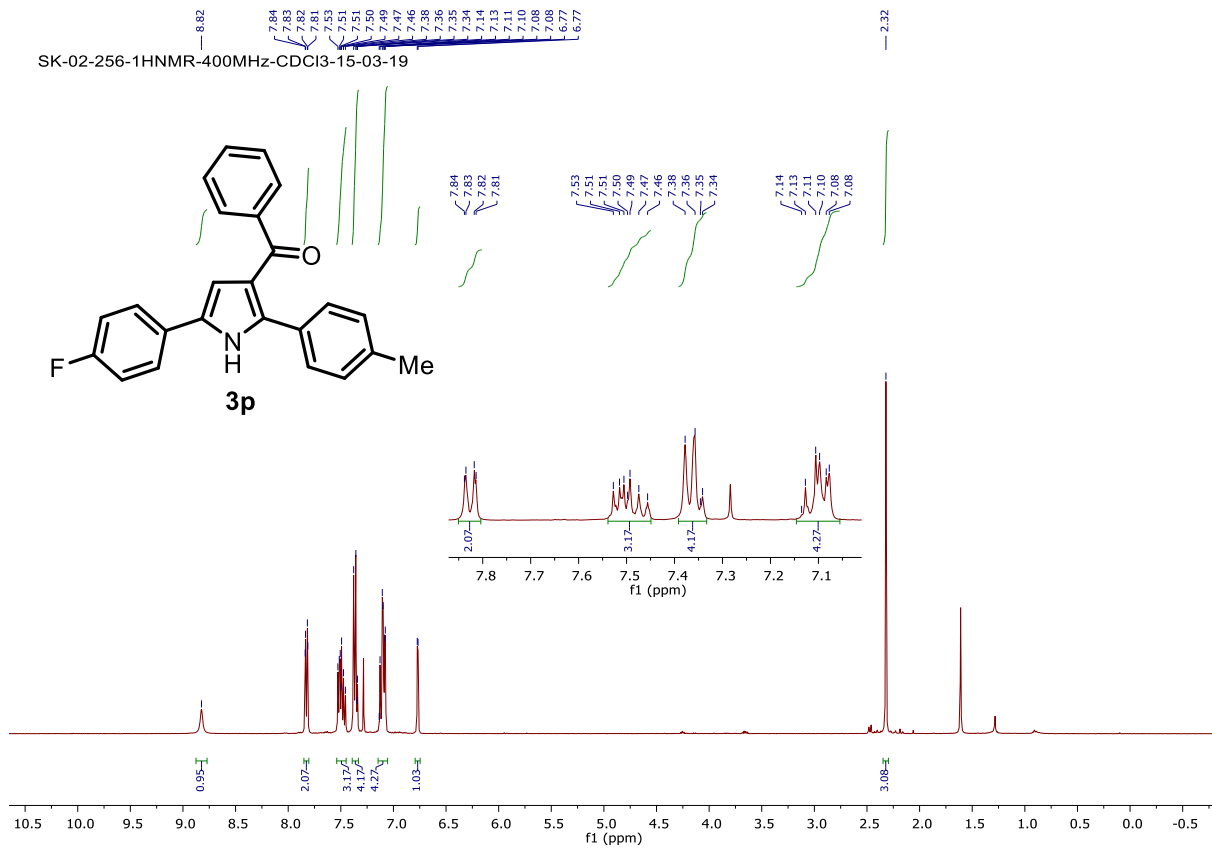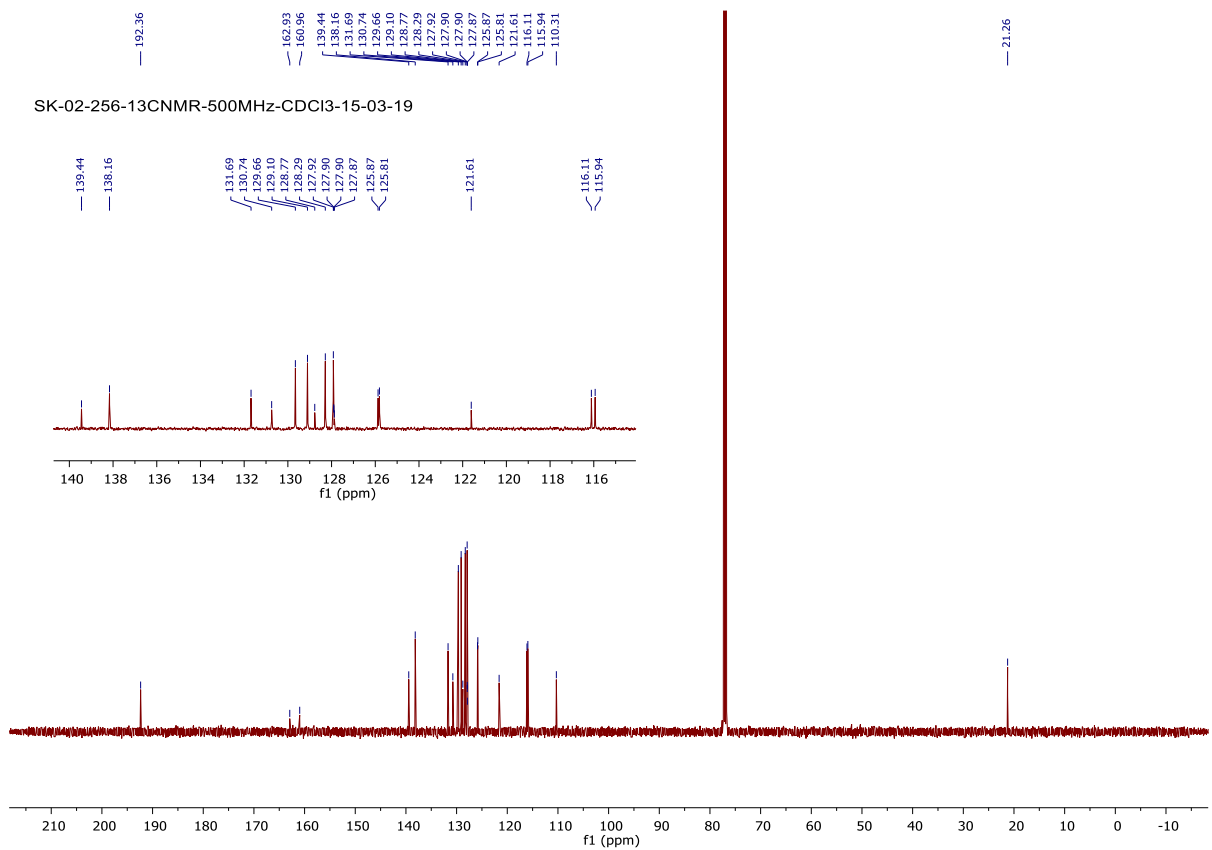

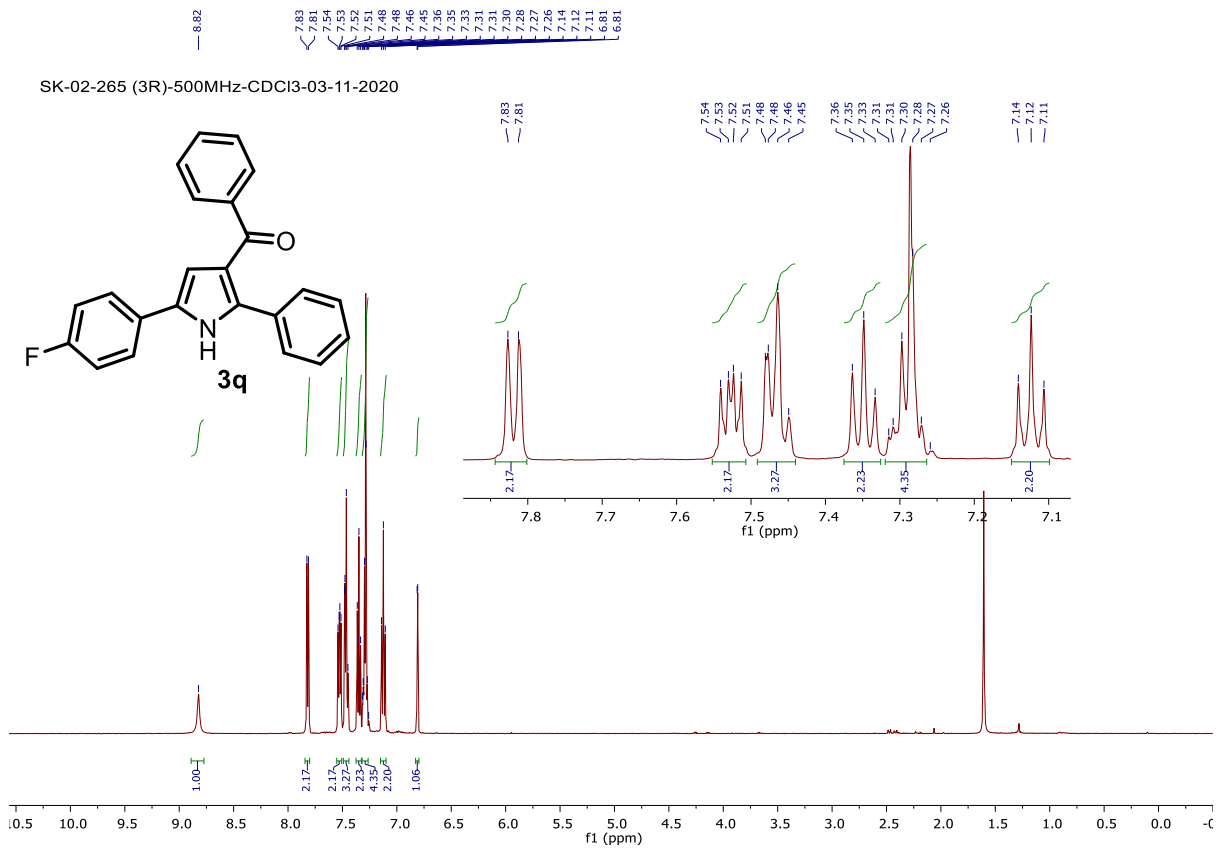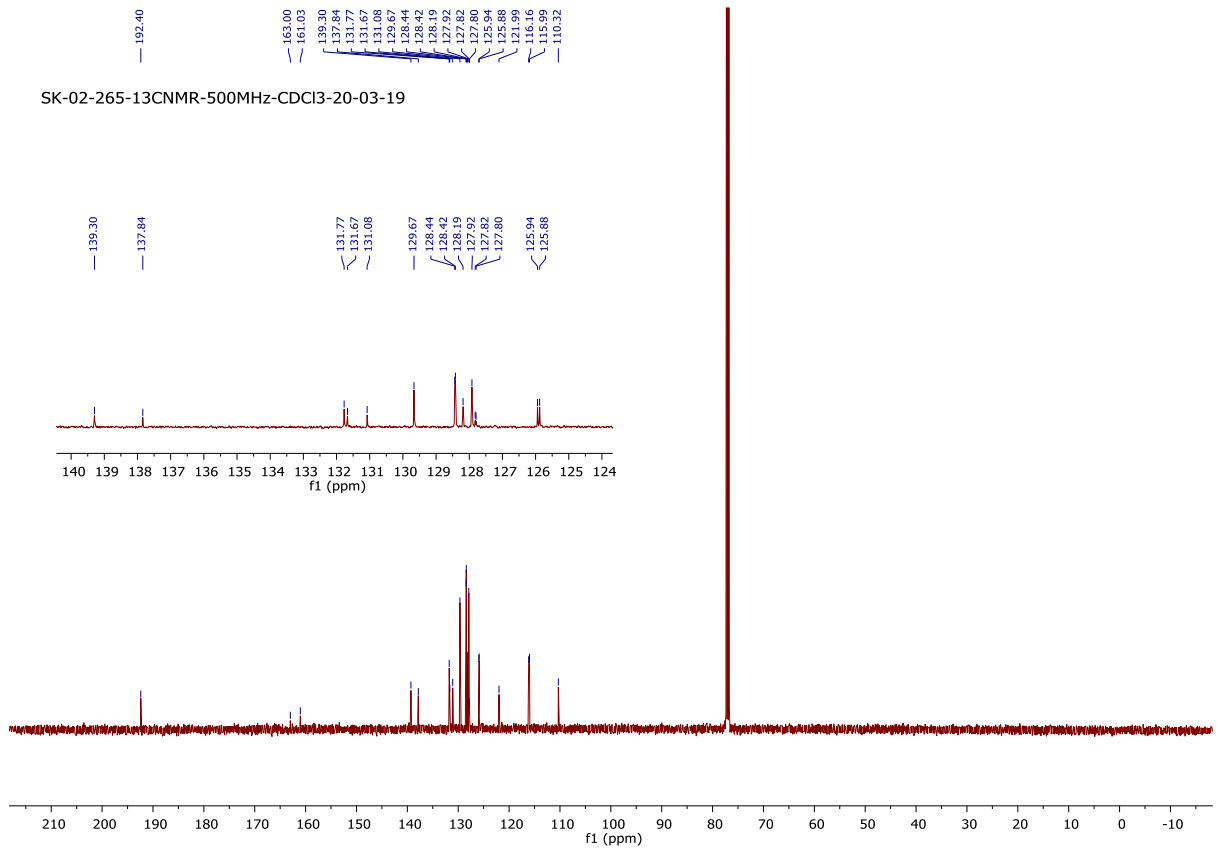

SK-02-252-1HNMR-400MHZ--CDCl3-14-03-19

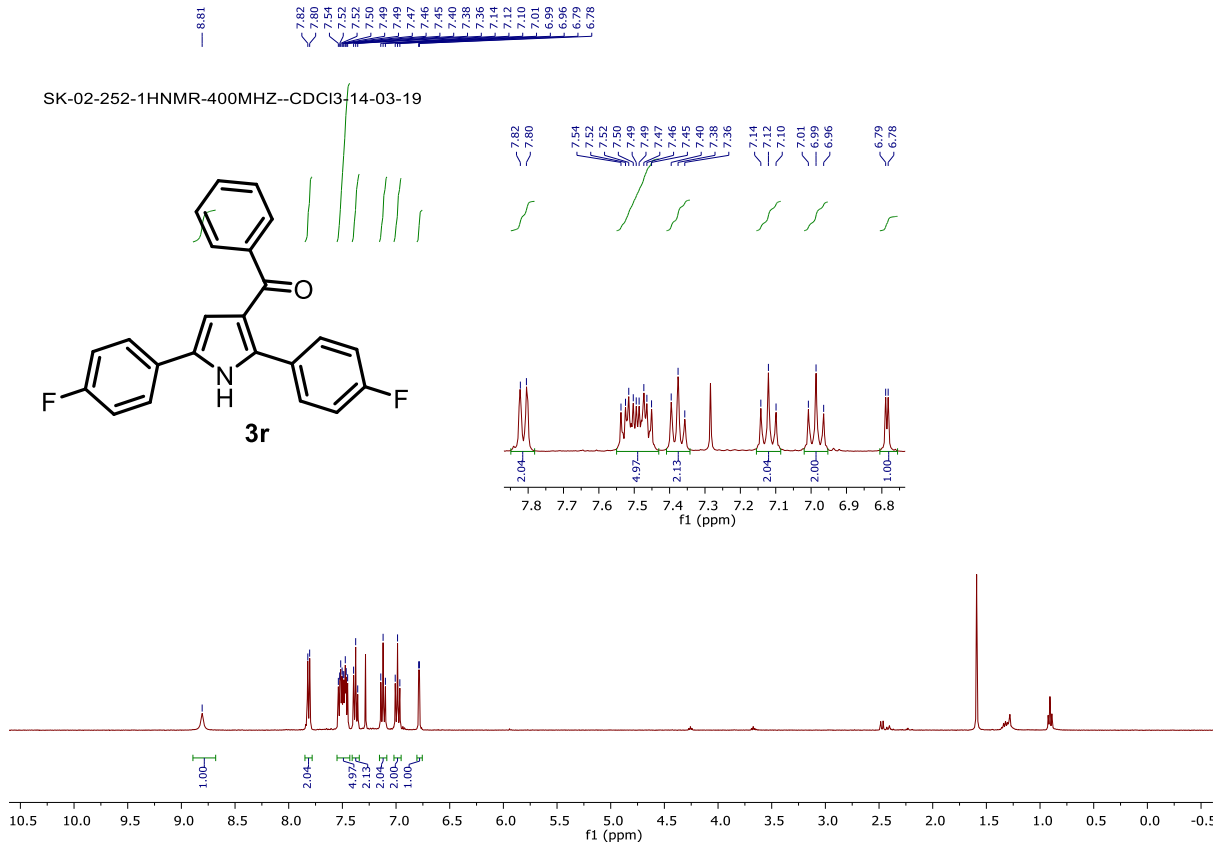

SK-02-252-13C NMR-400MHZ--CDCl3-14-03-19

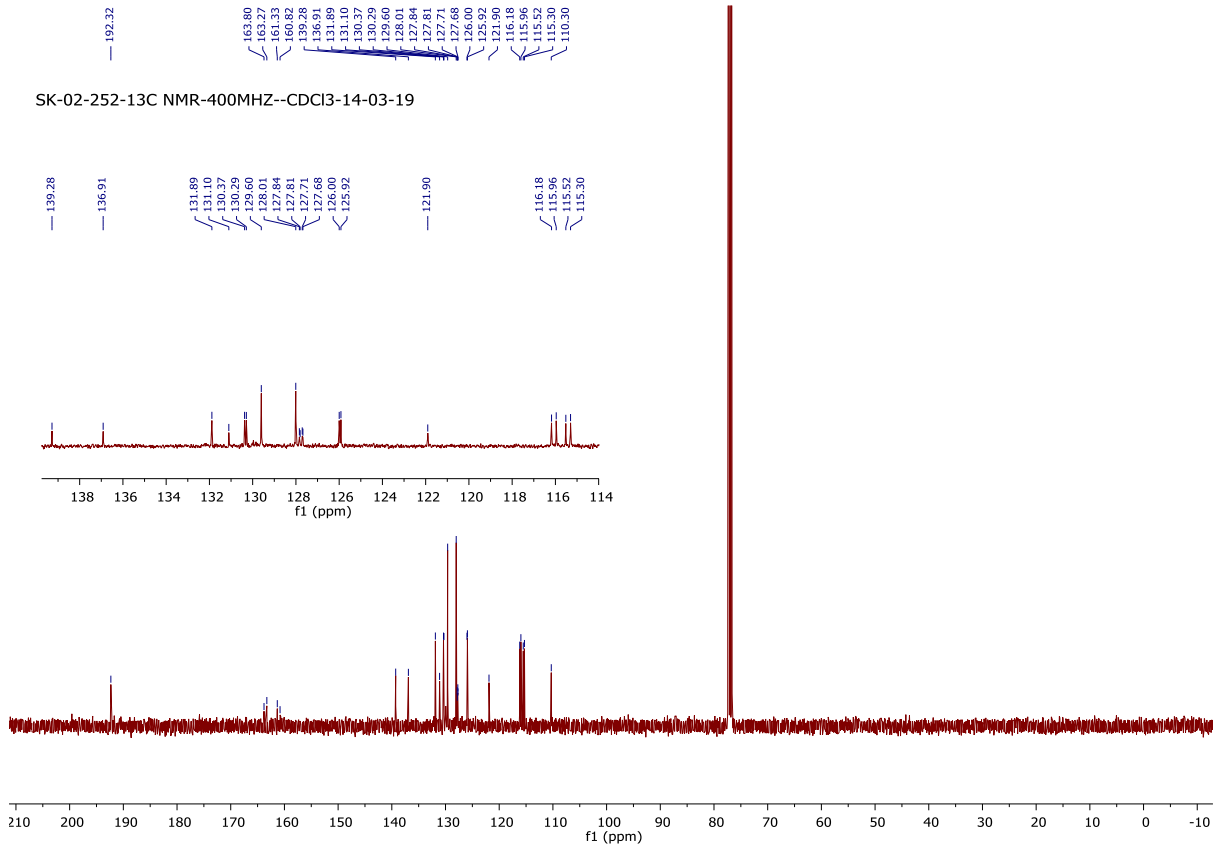

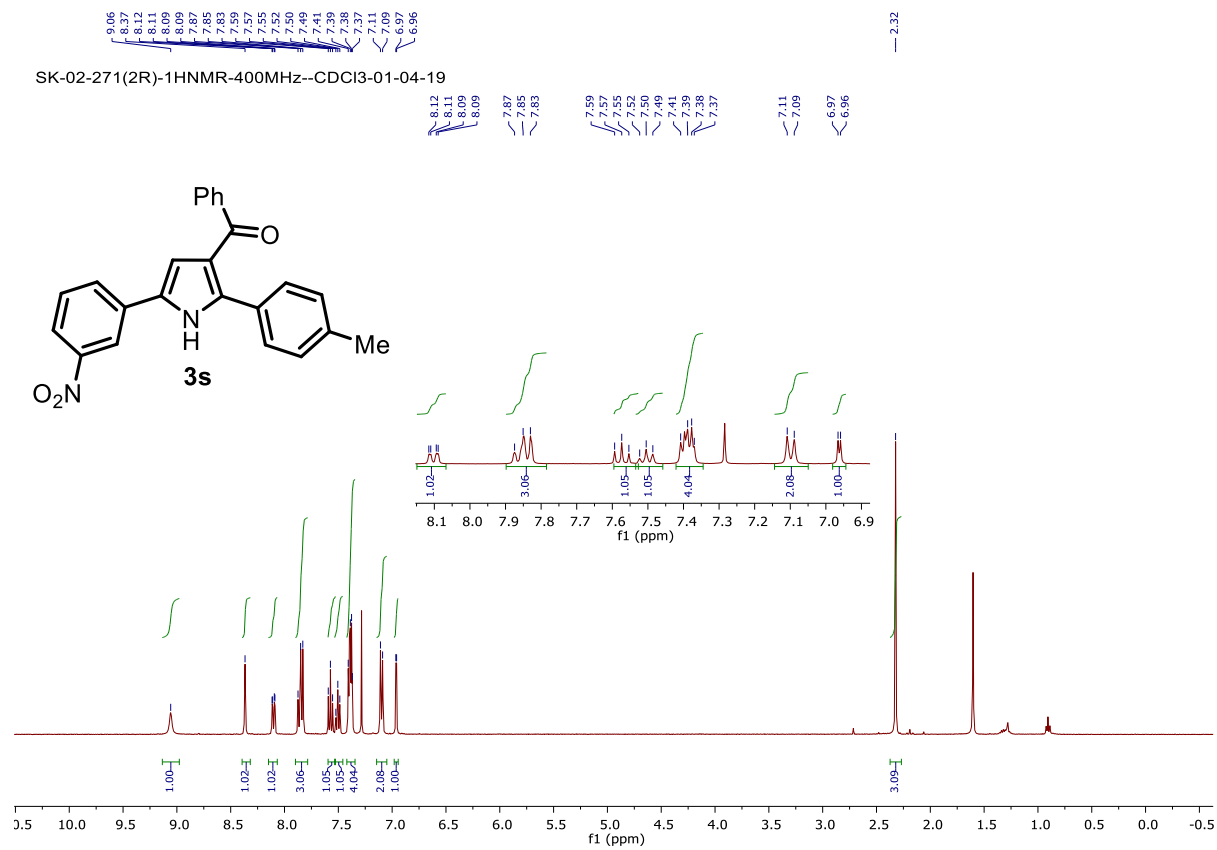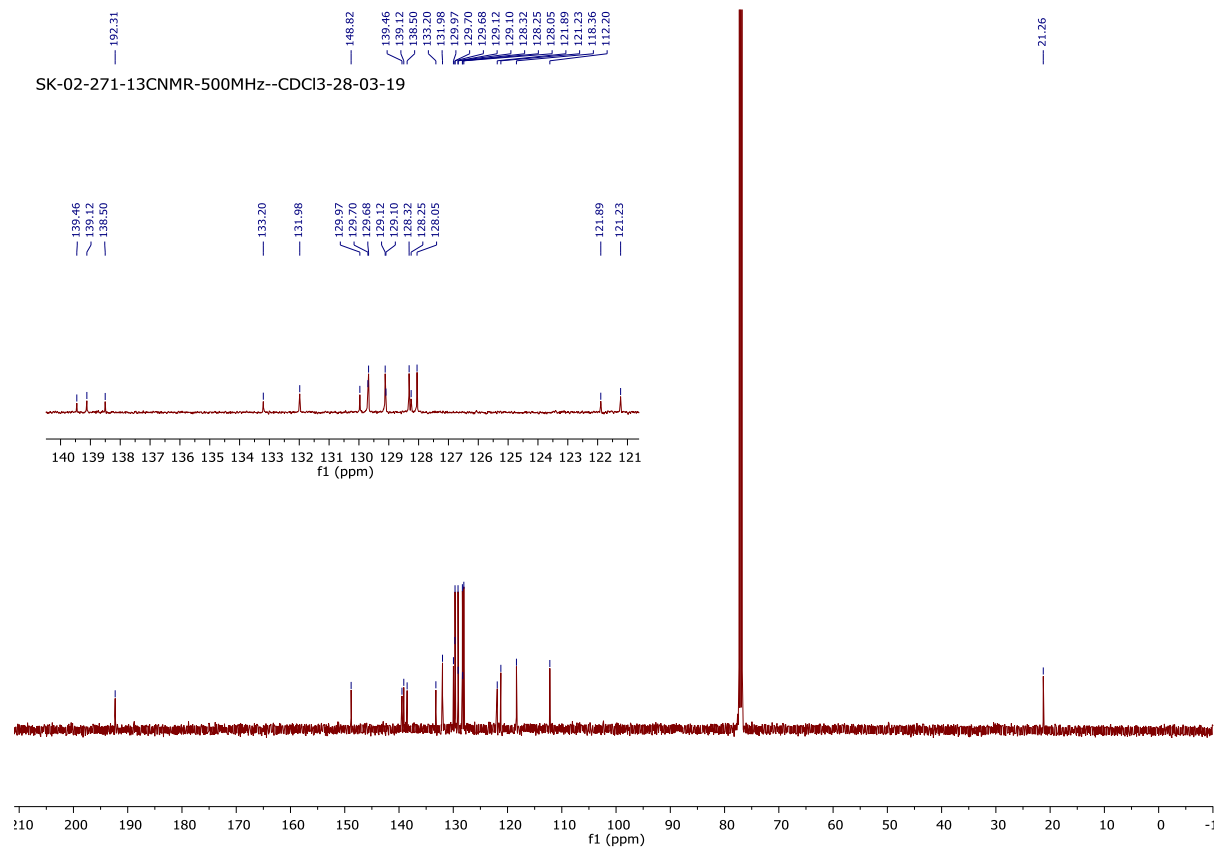

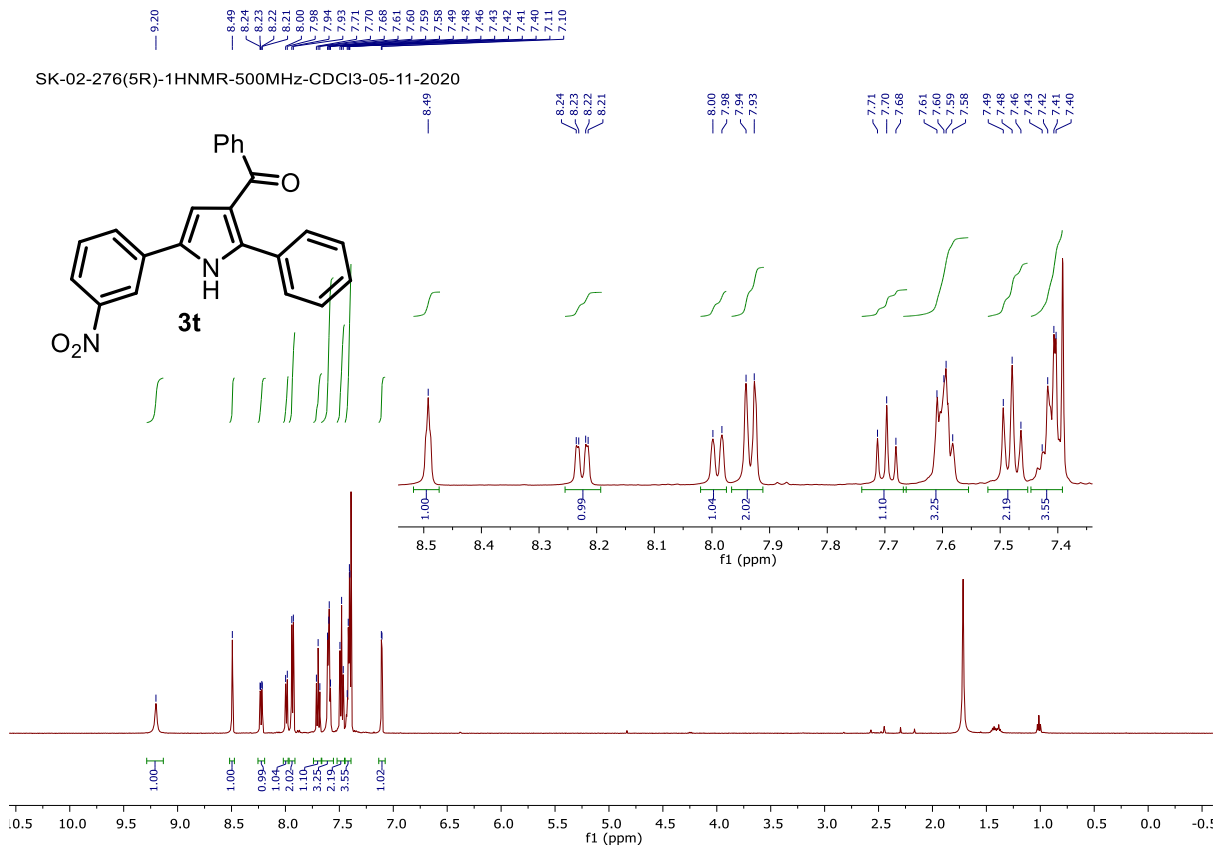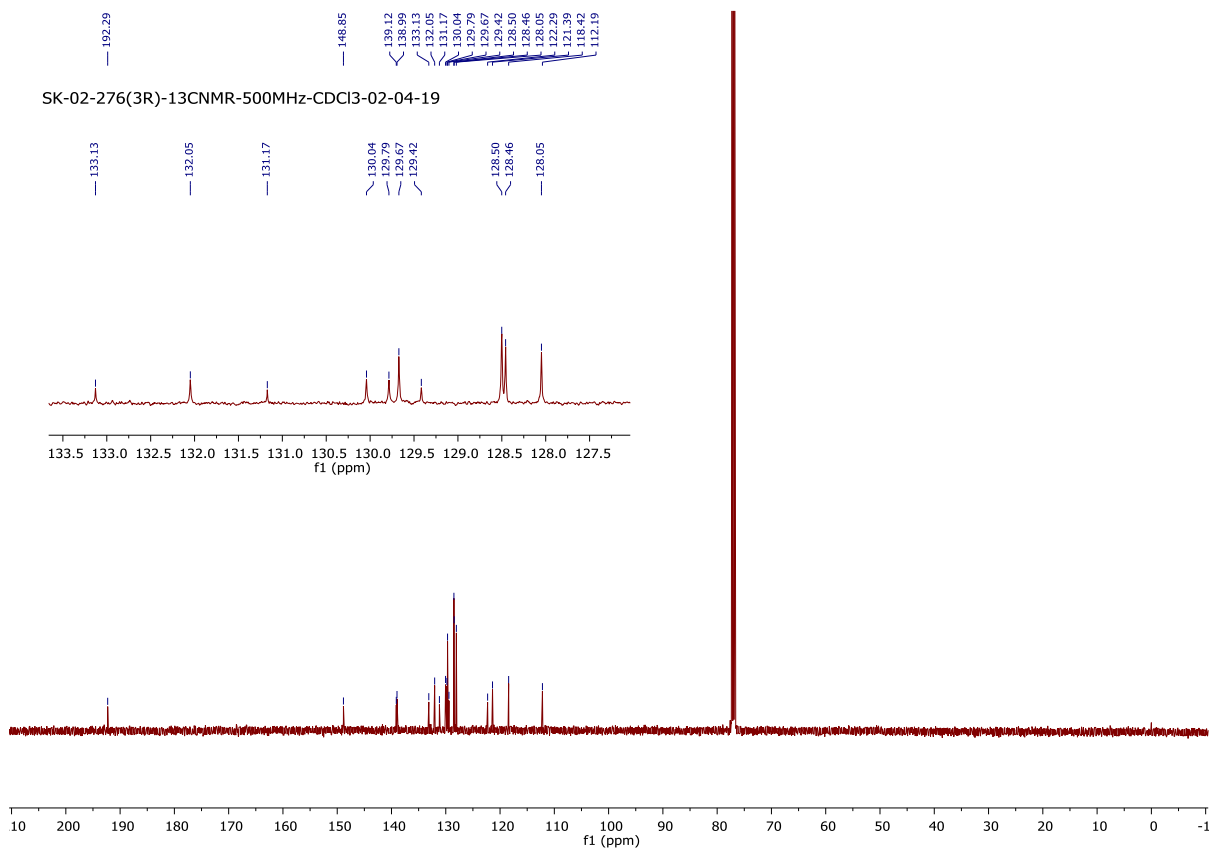

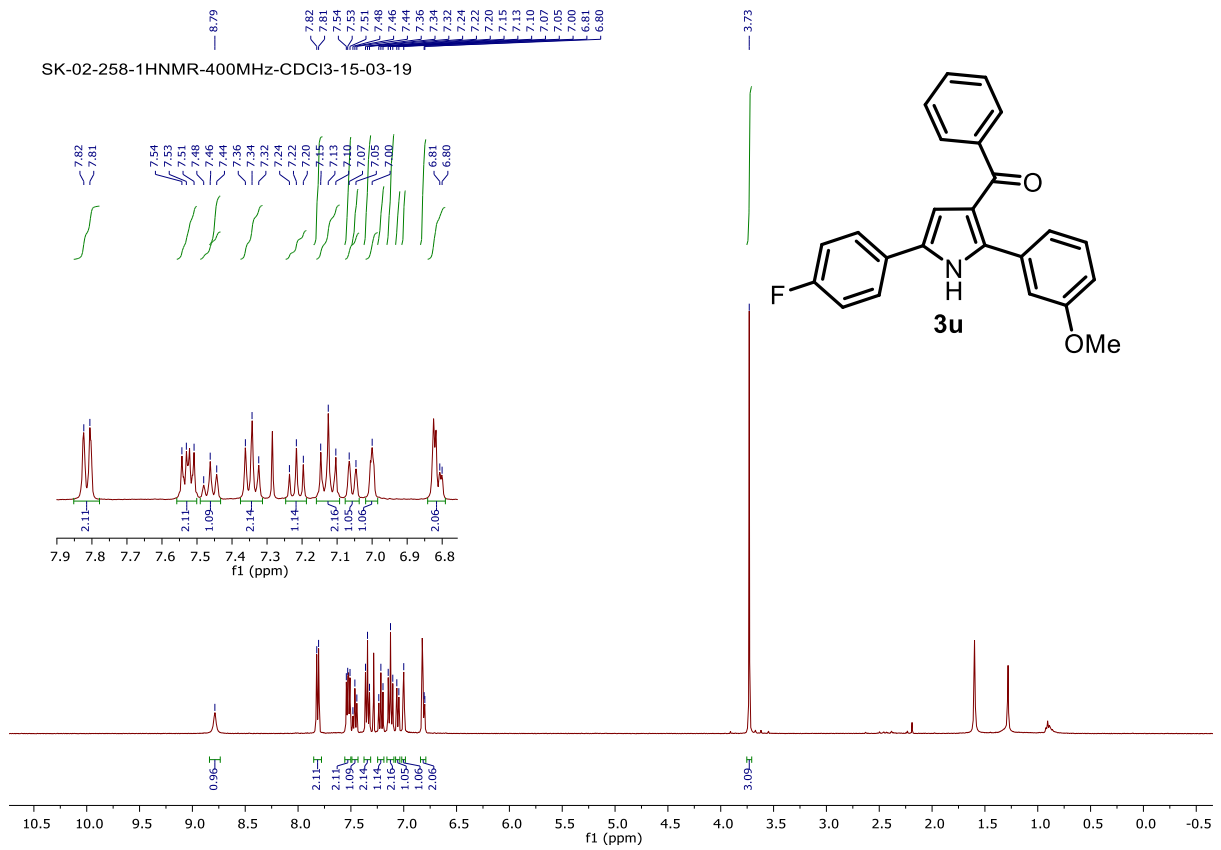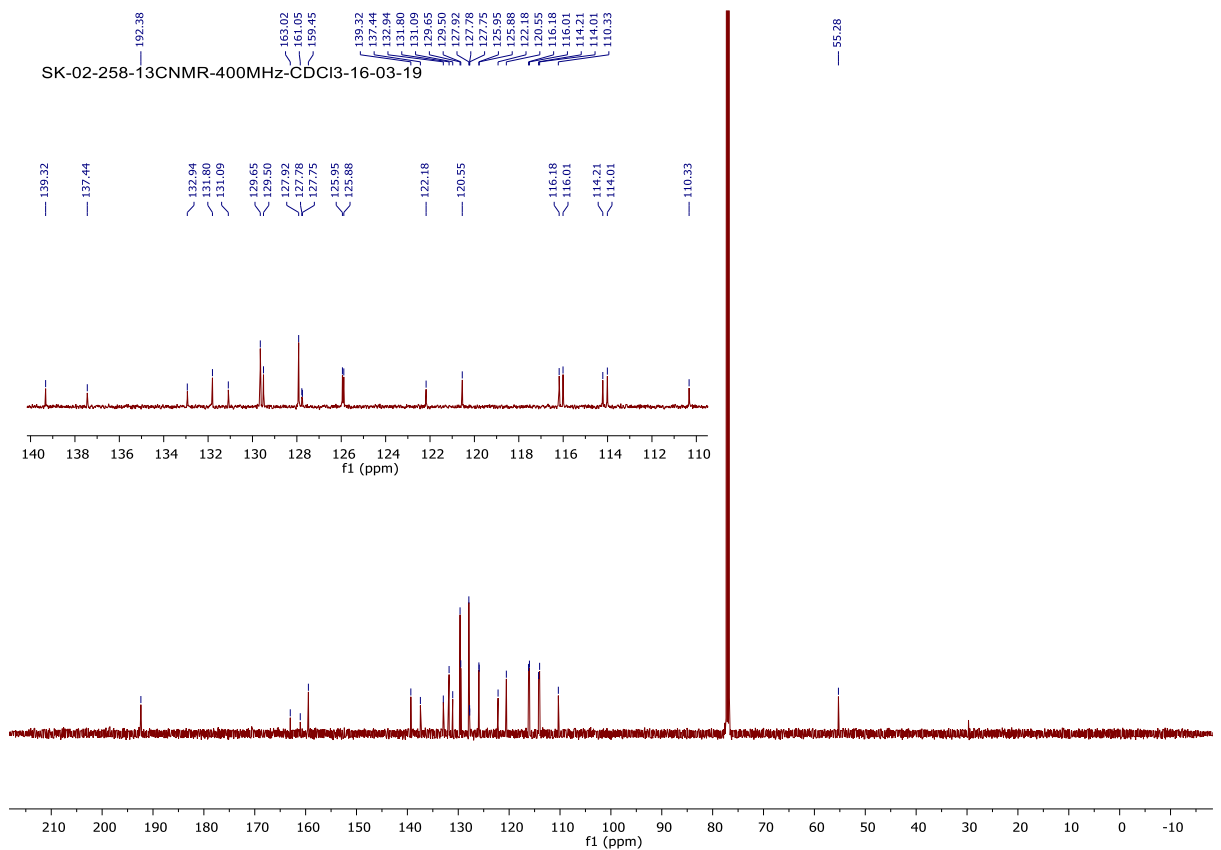

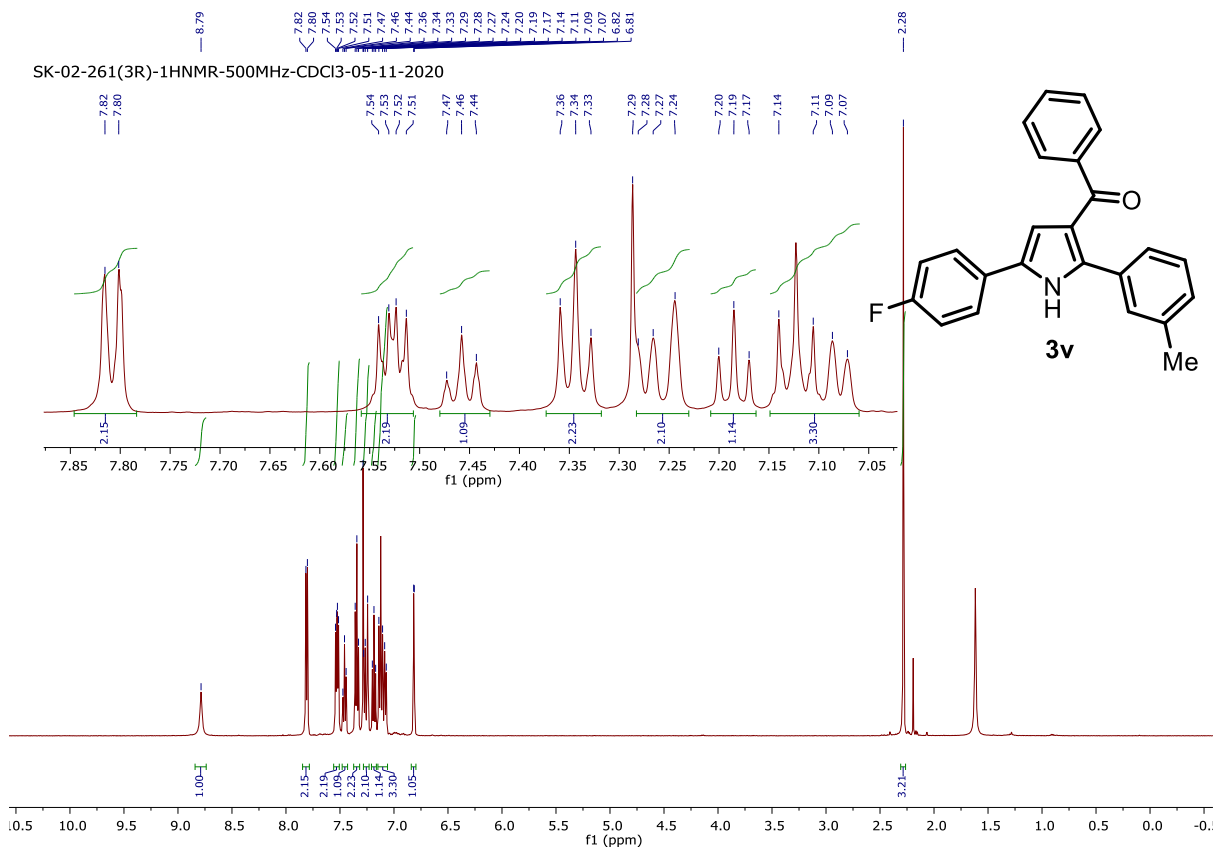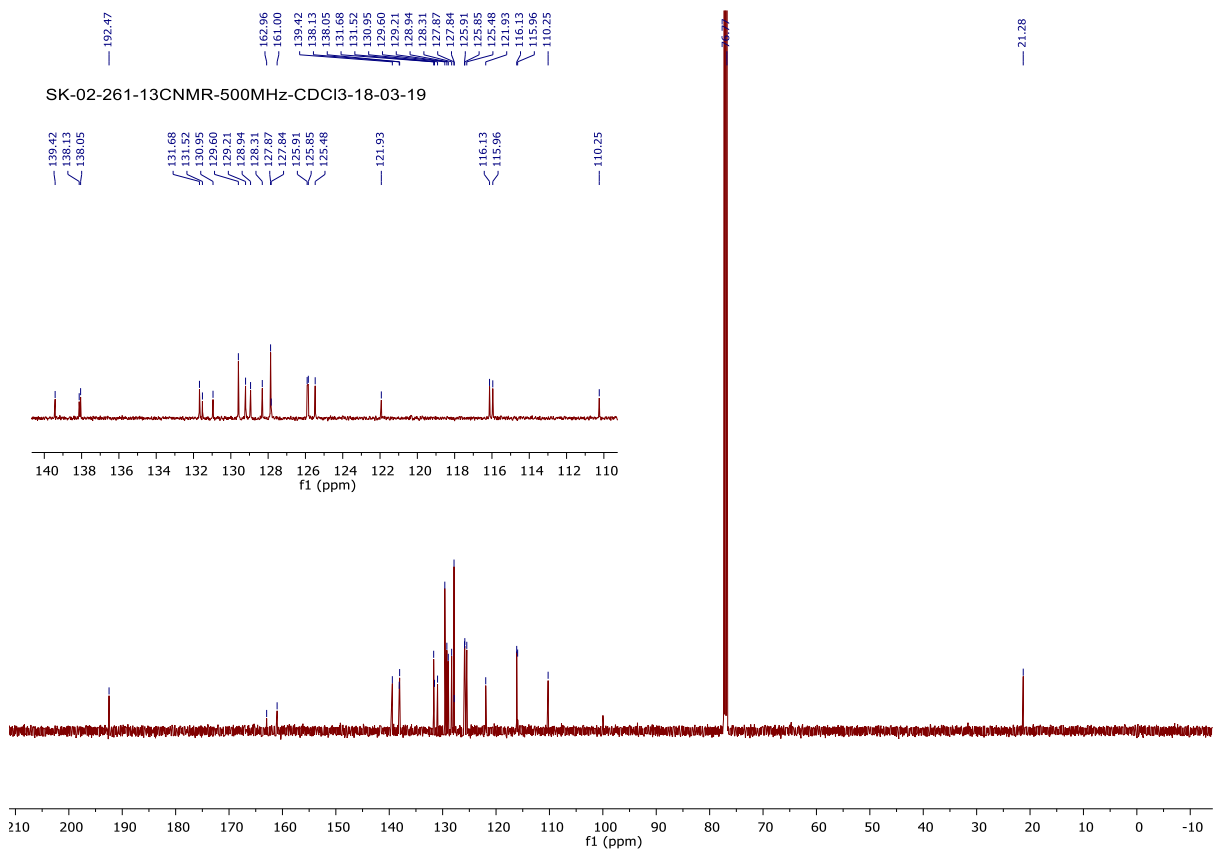



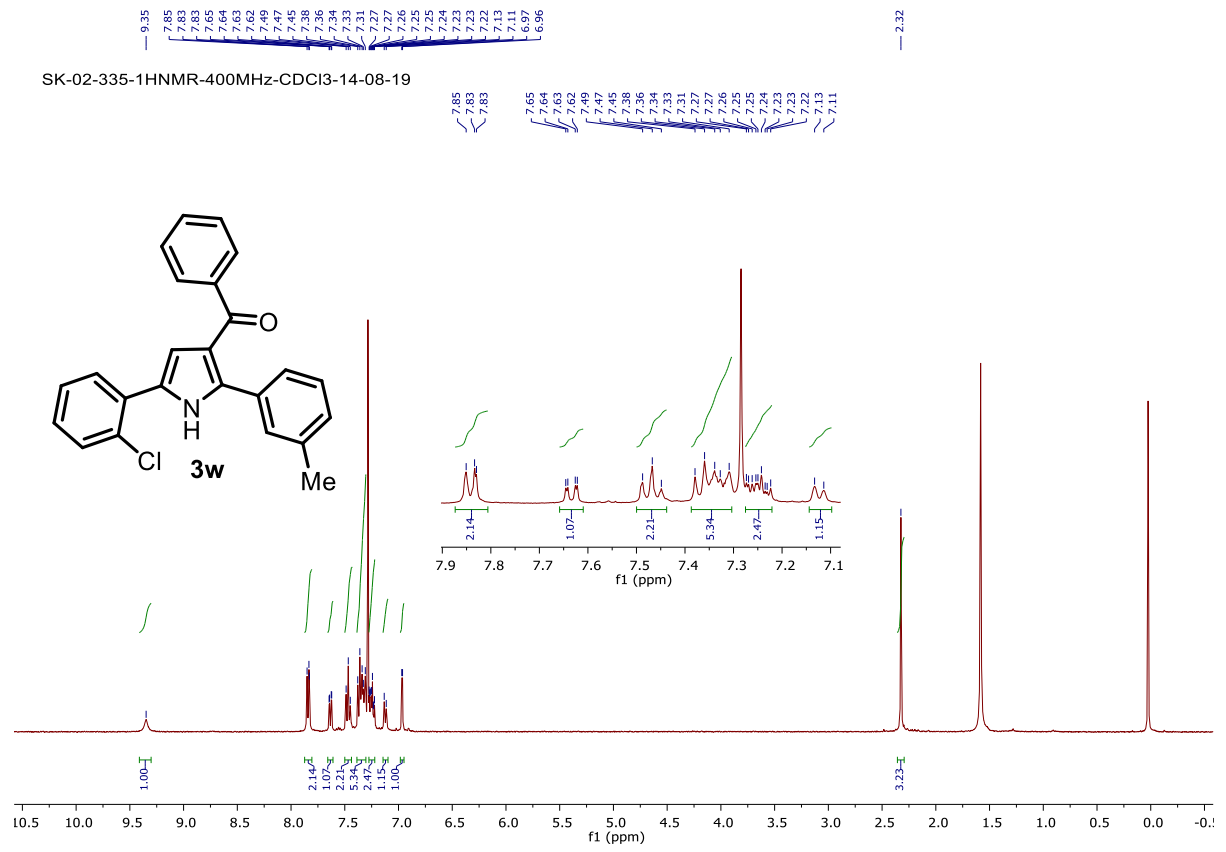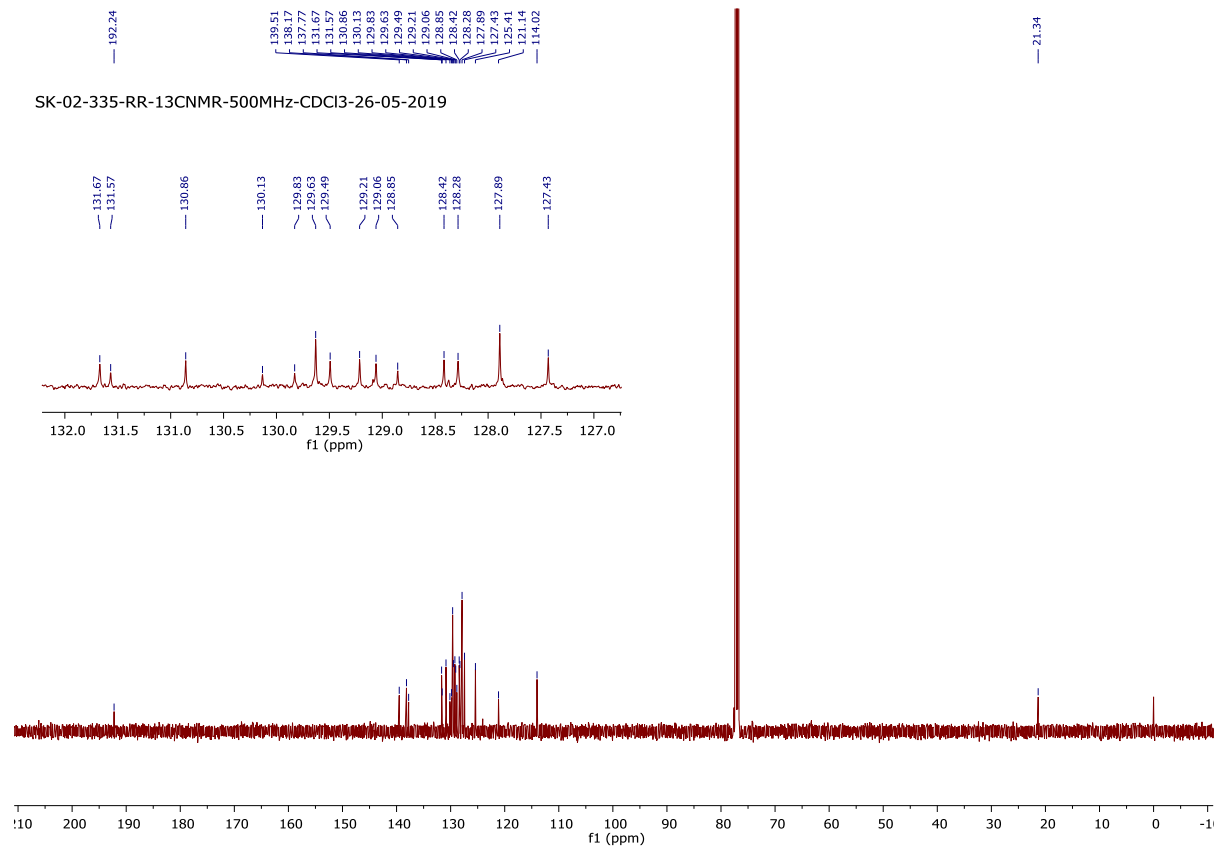

SK-02-328(5R)-1HNMR-400MHZ-CDCl3-14-08-19

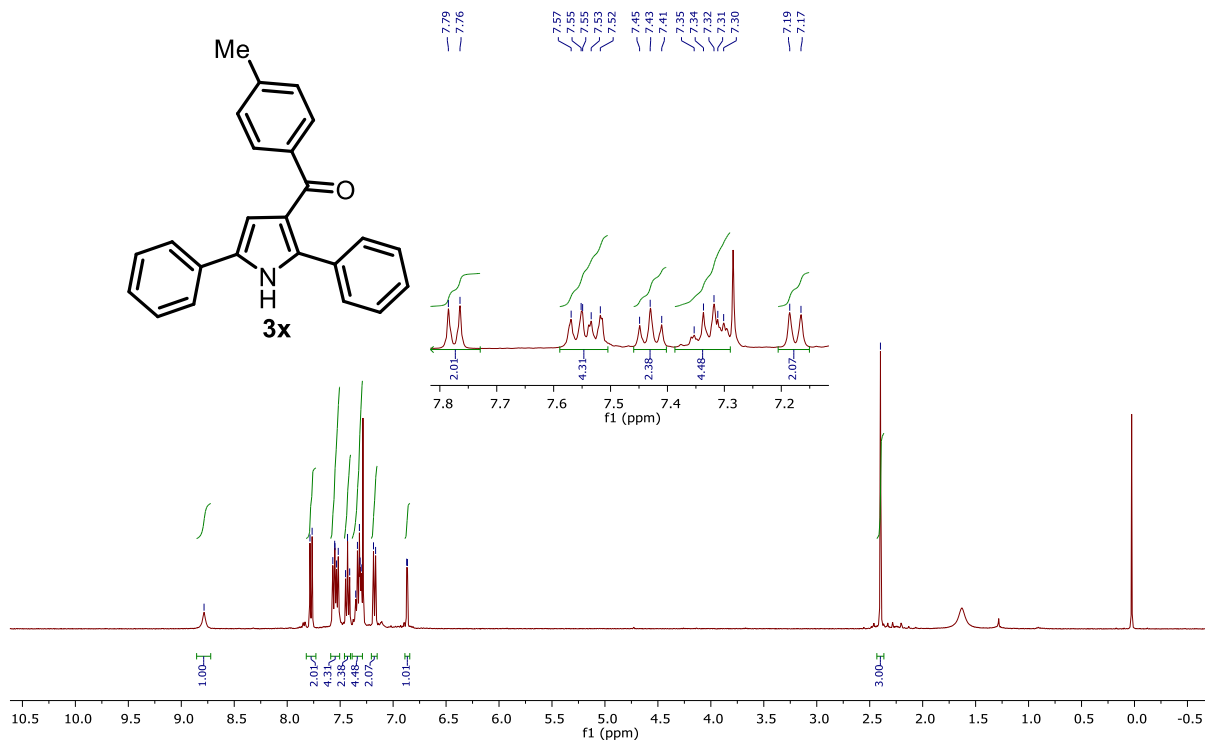

SK-02-328-13CNMR-400MHZ-CDCl3-18-05-19

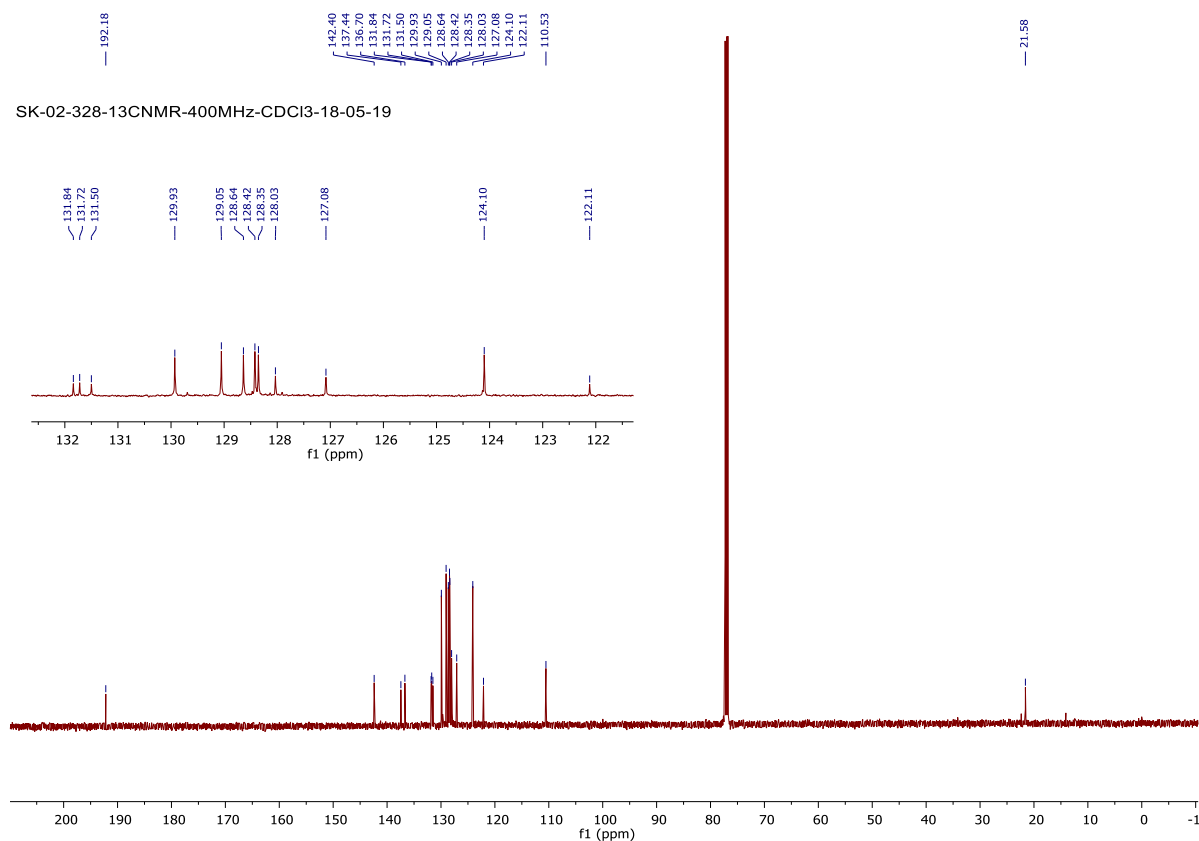

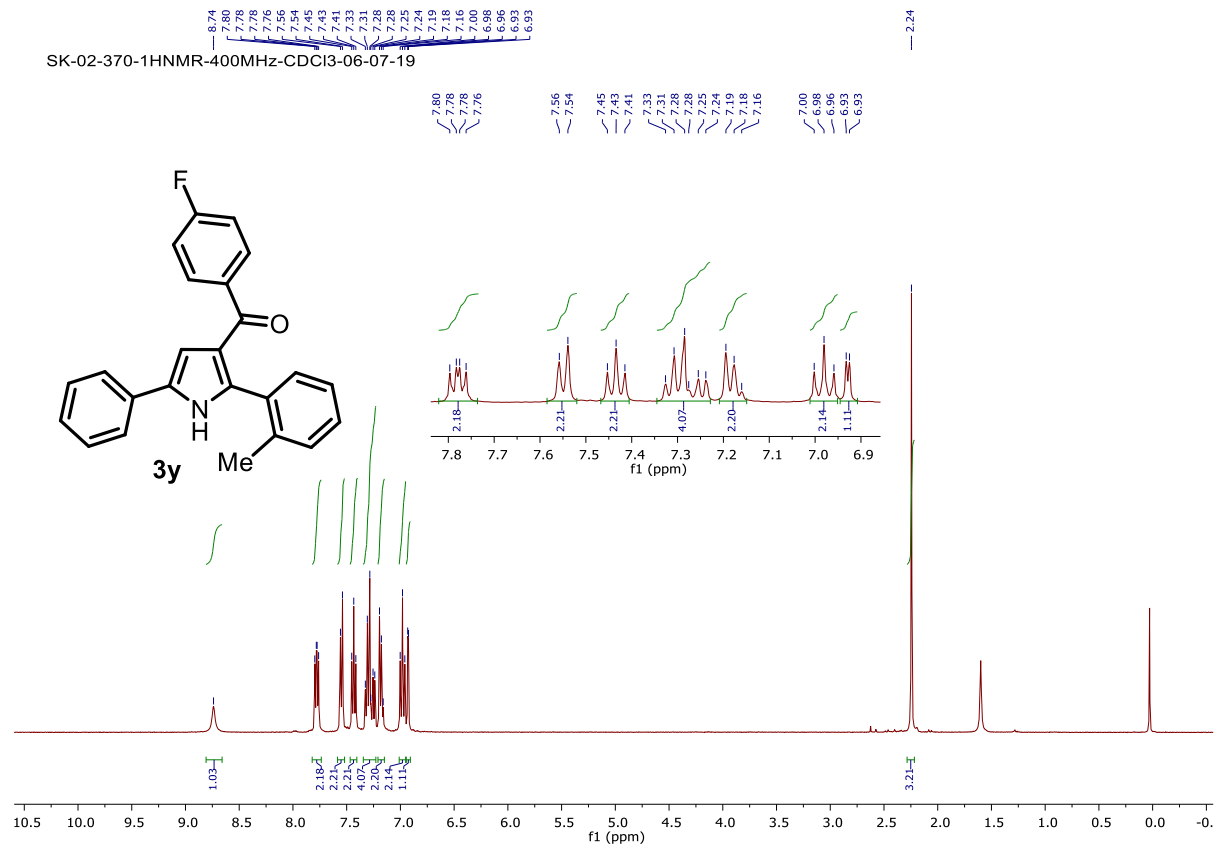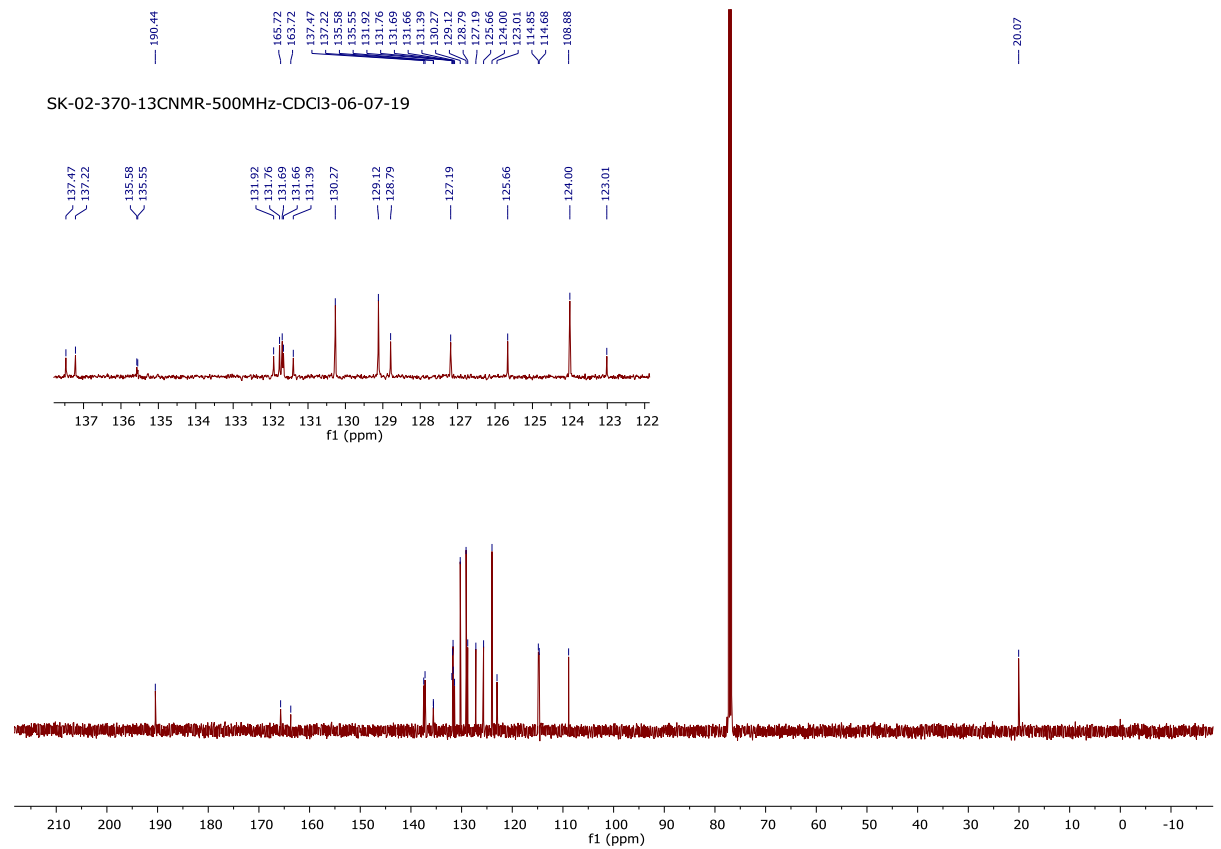

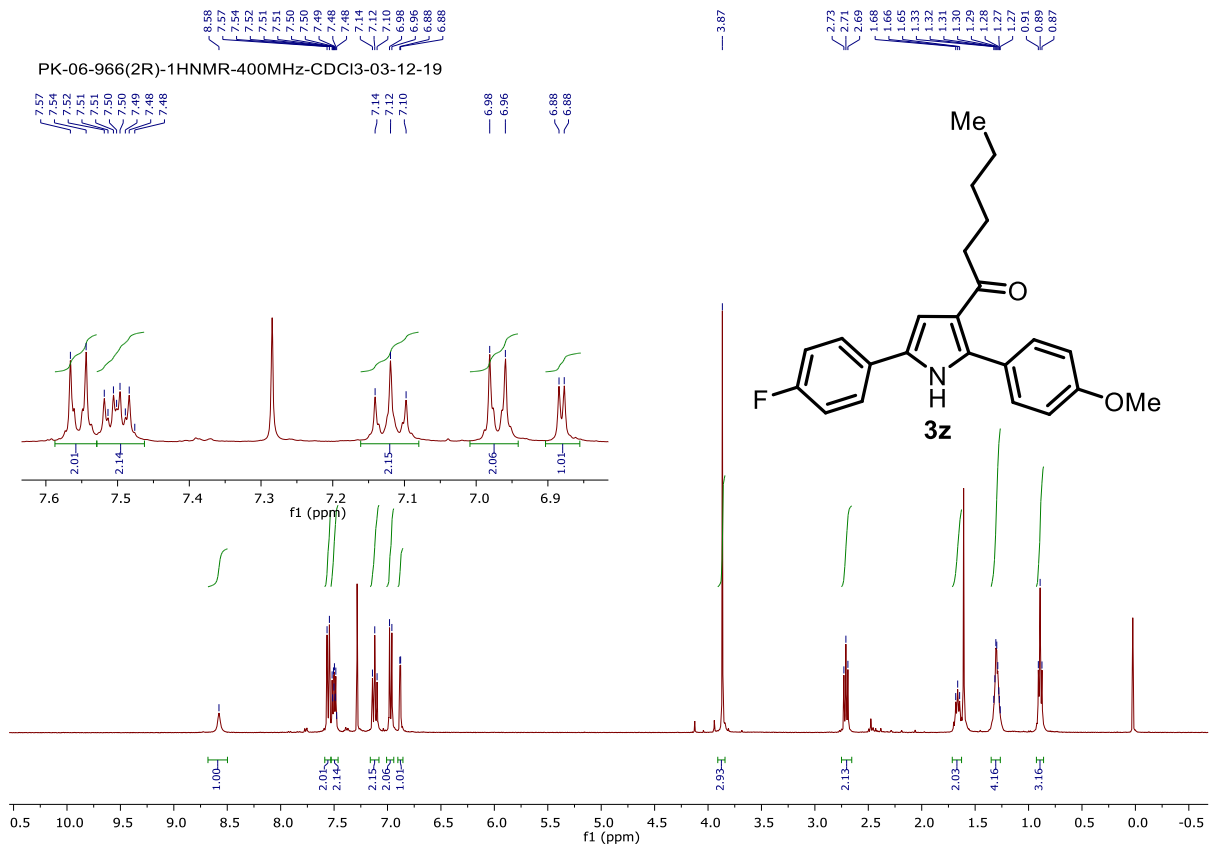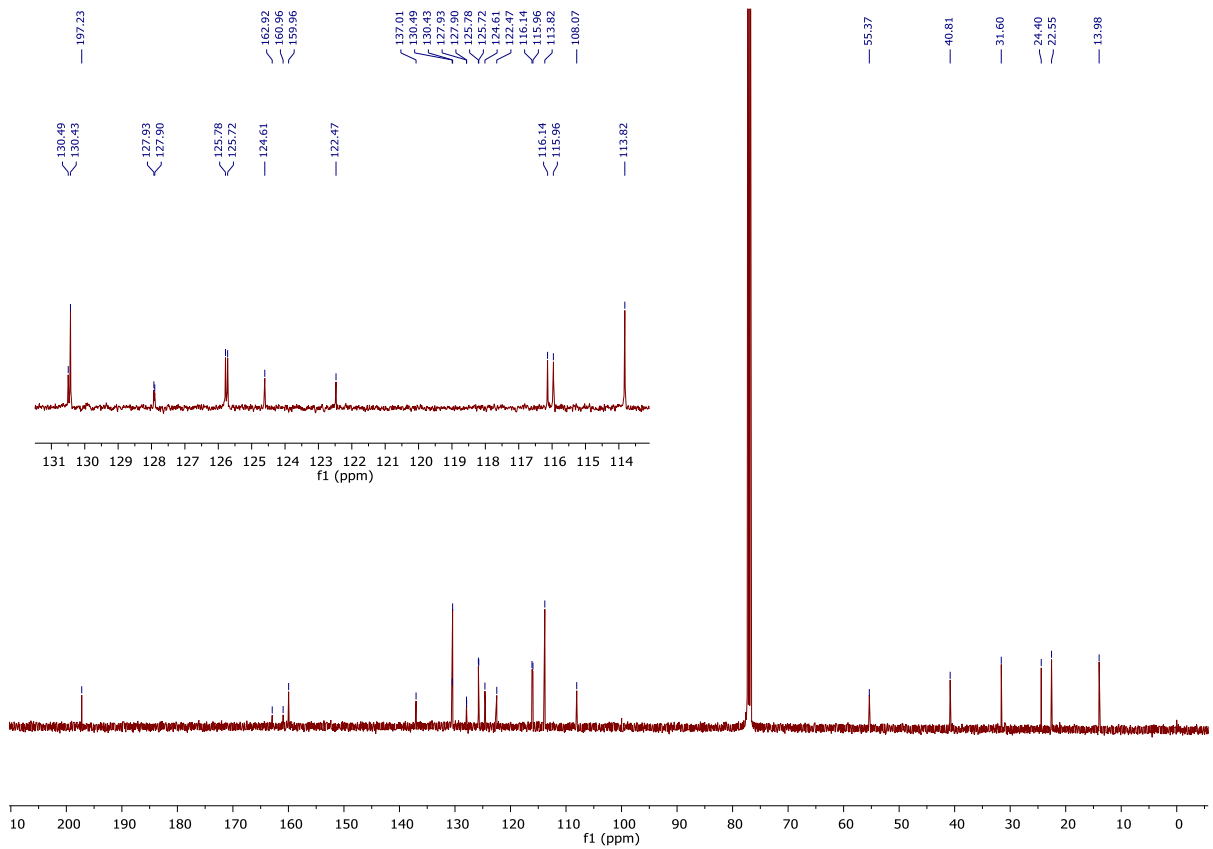

PK-06-1075(I)-1HNMR-400MHz-CDCl3-29-10-2020

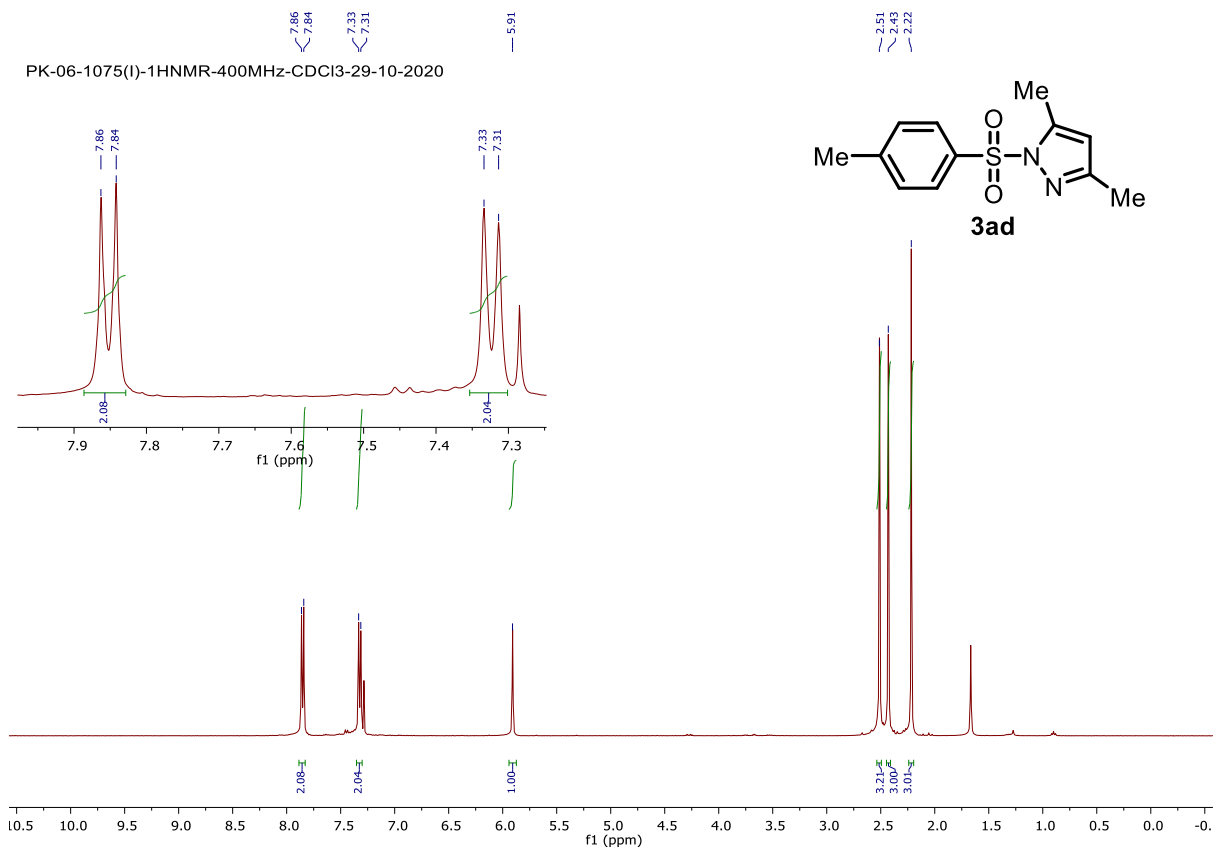

PK-06-1075(I)-13CNMR-500MHz-CDCl3-29-10-2020

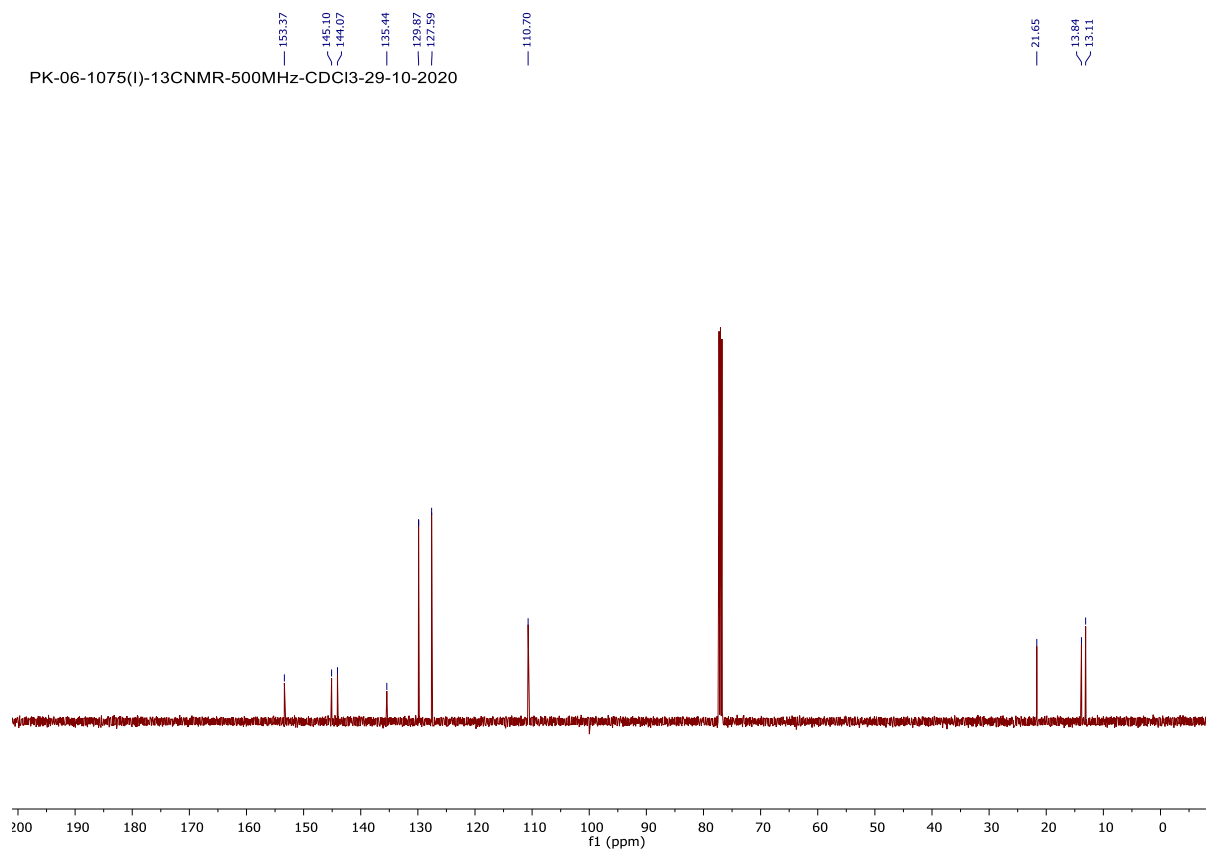

PK-06-1075(1)-1HNMR-400MHZ-CDCl3-04-12-2020

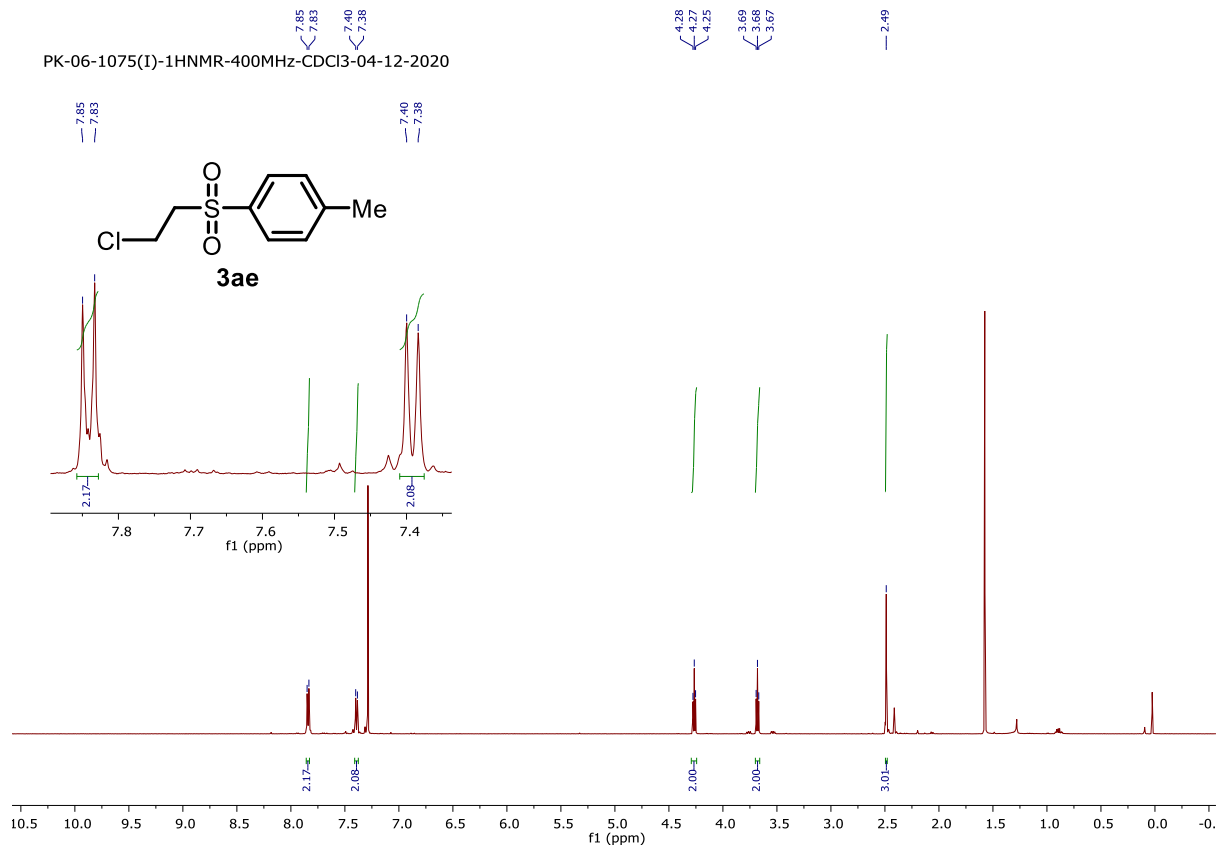

PK-06-1075(1)-1HNMR-500MHZ-CDCl3-29-10-2020

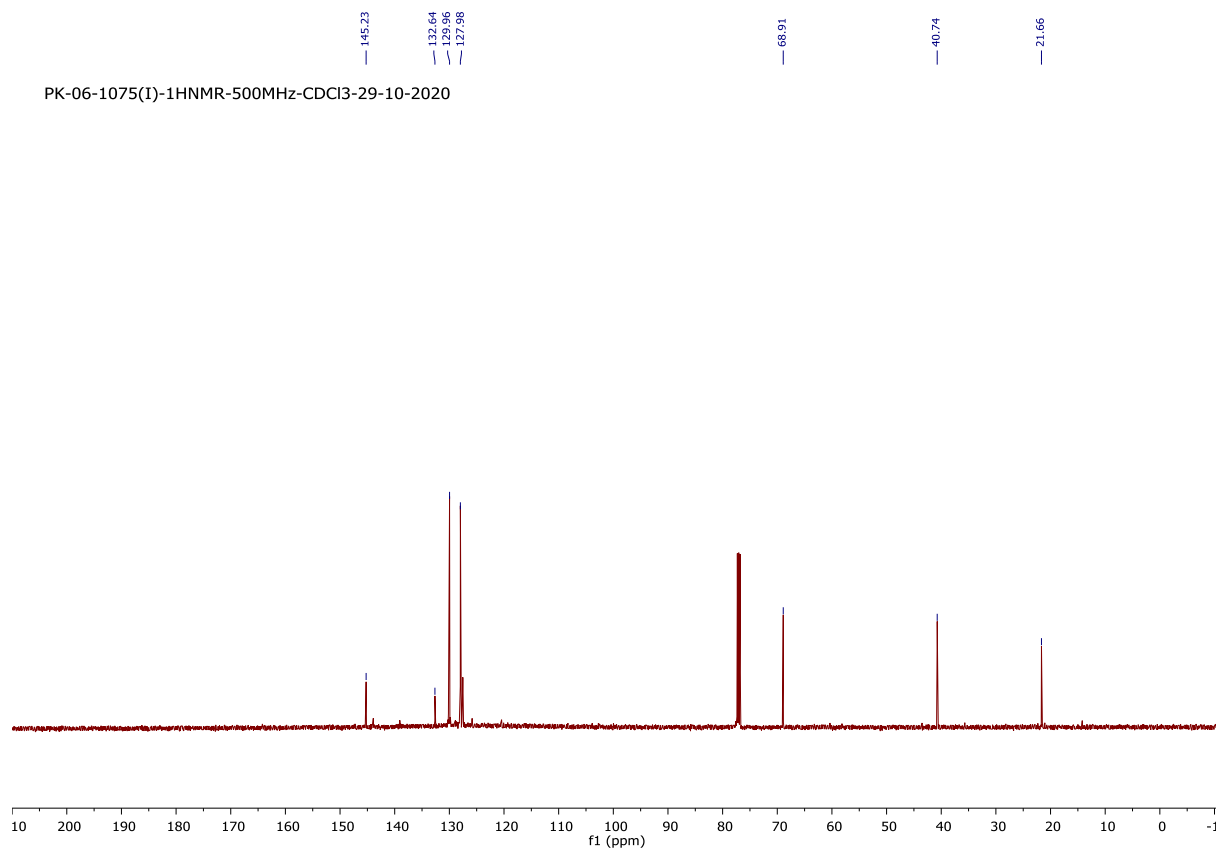

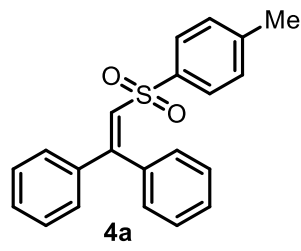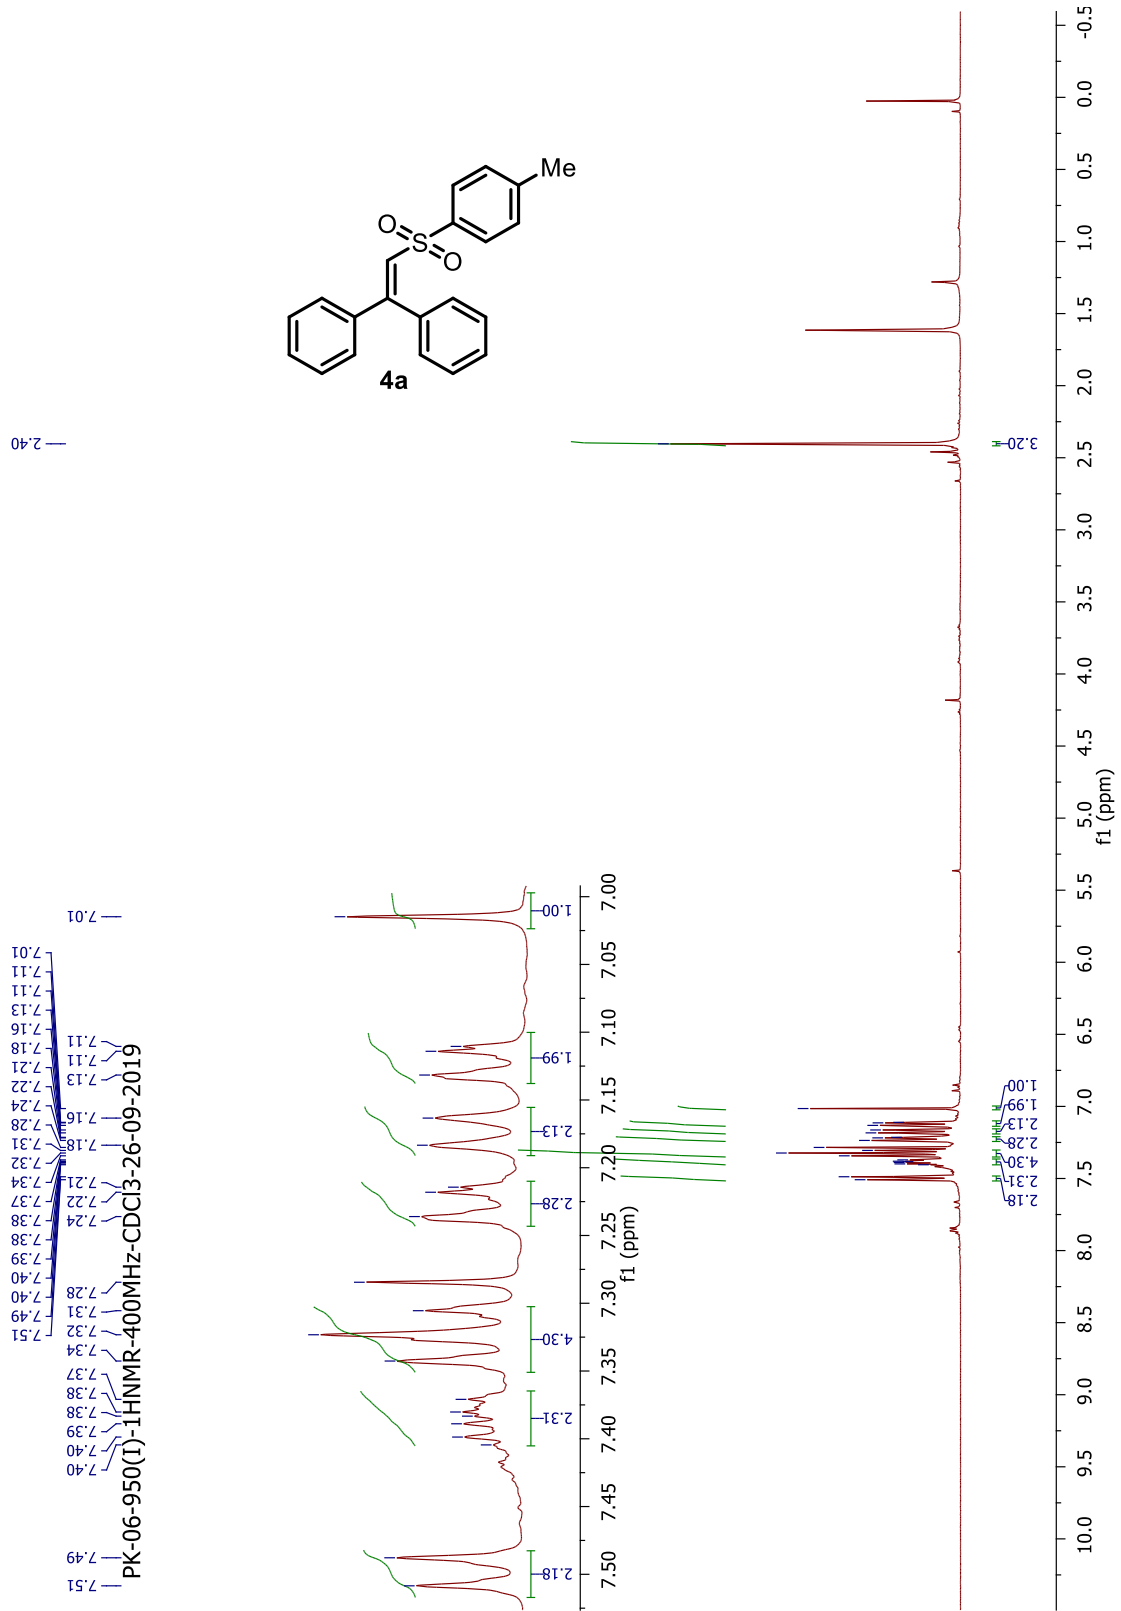

**X-ray diffraction structural analysis data of 3j:****Table 1 Crystal data and structure refinement for F1\_a.**

CCDC:1997416

|                                             |                                                               |
|---------------------------------------------|---------------------------------------------------------------|
| Identification code                         | F1_a                                                          |
| Empirical formula                           | C <sub>24</sub> H <sub>19</sub> NO                            |
| Formula weight                              | 337.40                                                        |
| Temperature/K                               | 287.55                                                        |
| Crystal system                              | monoclinic                                                    |
| Space group                                 | P2 <sub>1</sub> /c                                            |
| a/Å                                         | 14.2820(13)                                                   |
| b/Å                                         | 13.5704(9)                                                    |
| c/Å                                         | 10.3175(9)                                                    |
| α/°                                         | 90                                                            |
| β/°                                         | 110.860(2)                                                    |
| γ/°                                         | 90                                                            |
| Volume/Å <sup>3</sup>                       | 1868.6(3)                                                     |
| Z                                           | 4                                                             |
| ρ <sub>calc</sub> /cm <sup>3</sup>          | 1.199                                                         |
| μ/mm <sup>-1</sup>                          | 0.073                                                         |
| F(000)                                      | 712.0                                                         |
| Crystal size/mm <sup>3</sup>                | 0.57 × 0.45 × 0.34                                            |
| Radiation                                   | MoKα (λ = 0.71073)                                            |
| 2θ range for data collection/°              | 5.182 to 55.956                                               |
| Index ranges                                | -18 ≤ h ≤ 18, -14 ≤ k ≤ 17, -13 ≤ l ≤ 13                      |
| Reflections collected                       | 18733                                                         |
| Independent reflections                     | 4495 [R <sub>int</sub> = 0.1084, R <sub>sigma</sub> = 0.1107] |
| Data/restraints/parameters                  | 4495/0/236                                                    |
| Goodness-of-fit on F <sup>2</sup>           | 1.024                                                         |
| Final R indexes [I >= 2σ (I)]               | R <sub>1</sub> = 0.0701, wR <sub>2</sub> = 0.1276             |
| Final R indexes [all data]                  | R <sub>1</sub> = 0.1752, wR <sub>2</sub> = 0.1598             |
| Largest diff. peak/hole / e Å <sup>-3</sup> | 0.15/-0.18                                                    |



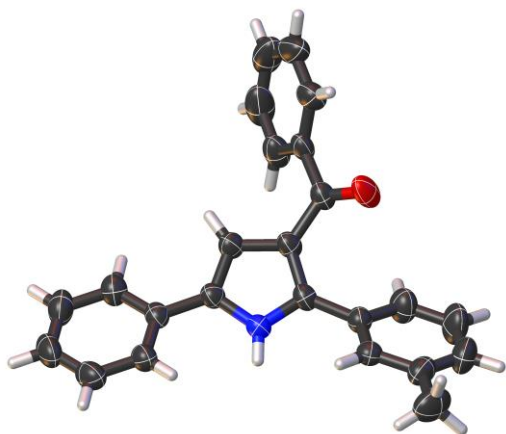

Thermal ellipsoids shown at 50% probability level.

Figure S1. X-ray structure of (**3j**)

**X-ray diffraction structural analysis data of 3ad:****Table 2 Crystal data and structure refinement for 3ad.**

|                                             |                                                                     |
|---------------------------------------------|---------------------------------------------------------------------|
| CCDC: 2060949                               |                                                                     |
| Identification code                         | Final                                                               |
| Empirical formula                           | C <sub>12</sub> H <sub>14</sub> N <sub>2</sub> O <sub>2</sub> S     |
| Formula weight                              | 250.31                                                              |
| Temperature/K                               | 140(2)                                                              |
| Crystal system                              | monoclinic                                                          |
| Space group                                 | P2 <sub>1</sub> /c                                                  |
| a/Å                                         | 9.912(3)                                                            |
| b/Å                                         | 15.262(4)                                                           |
| c/Å                                         | 8.115(2)                                                            |
| α/°                                         | 90                                                                  |
| β/°                                         | 98.518(10)                                                          |
| γ/°                                         | 90                                                                  |
| Volume/Å <sup>3</sup>                       | 1214.1(5)                                                           |
| Z                                           | 4                                                                   |
| ρ <sub>calc</sub> /g/cm <sup>3</sup>        | 1.369                                                               |
| μ/mm <sup>-1</sup>                          | 0.258                                                               |
| F(000)                                      | 528.0                                                               |
| Crystal size/mm <sup>3</sup>                | ? × ? × ?                                                           |
| Radiation                                   | MoKα (λ =<br>0.71073)                                               |
| 2Θ range for data collection/°              | 6.628 to 49.918                                                     |
| Index ranges                                | -11 ≤ h ≤ 11, -<br>18 ≤ k ≤ 18, -9<br>≤ l ≤ 9                       |
| Reflections collected                       | 25098                                                               |
| Independent reflections                     | 2086 [R <sub>int</sub> =<br>0.0450, R <sub>sigma</sub> =<br>0.0194] |
| Data/restraints/parameters                  | 2086/0/157                                                          |
| Goodness-of-fit on F <sup>2</sup>           | 1.012                                                               |
| Final R indexes [I ≥ 2σ (I)]                | R <sub>1</sub> = 0.0312,<br>wR <sub>2</sub> = 0.0905                |
| Final R indexes [all data]                  | R <sub>1</sub> = 0.0349,<br>wR <sub>2</sub> = 0.0946                |
| Largest diff. peak/hole / e Å <sup>-3</sup> | 0.31/-0.30                                                          |

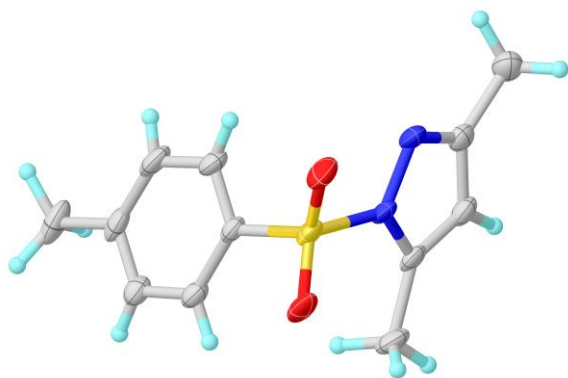

Thermal ellipsoids shown at 50% probability level.

Figure S2. X-ray structure of (**3ad**)

# Display Report

## Analysis Info

Analysis Name D:\Data\new user data 2021\March-2021\01-Mar\Dr.M.Kapur-SK-05-37-DS-II.d  
Method tune mix\_low.New.021117.m  
Sample Name SK-05-37-DS-II  
Comment

Acquisition Date 3/1/2021 4:24:33 PM  
Operator RUCHI  
Instrument micrOTOF-Q II 10330

## Acquisition Parameter

|             |            |                       |           |                  |           |
|-------------|------------|-----------------------|-----------|------------------|-----------|
| Source Type | ESI        | Ion Polarity          | Positive  | Set Nebulizer    | 0.4 Bar   |
| Focus       | Not active | Set Capillary         | 4600 V    | Set Dry Heater   | 180 °C    |
| Scan Begin  | 50 m/z     | Set End Plate Offset  | -500 V    | Set Dry Gas      | 4.0 l/min |
| Scan End    | 3000 m/z   | Set Collision Cell RF | 100.0 Vpp | Set Divert Valve | Waste     |

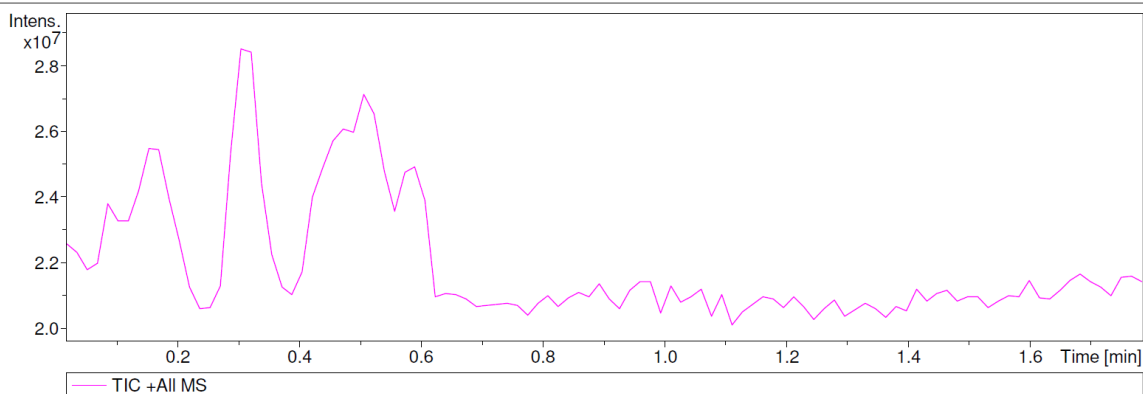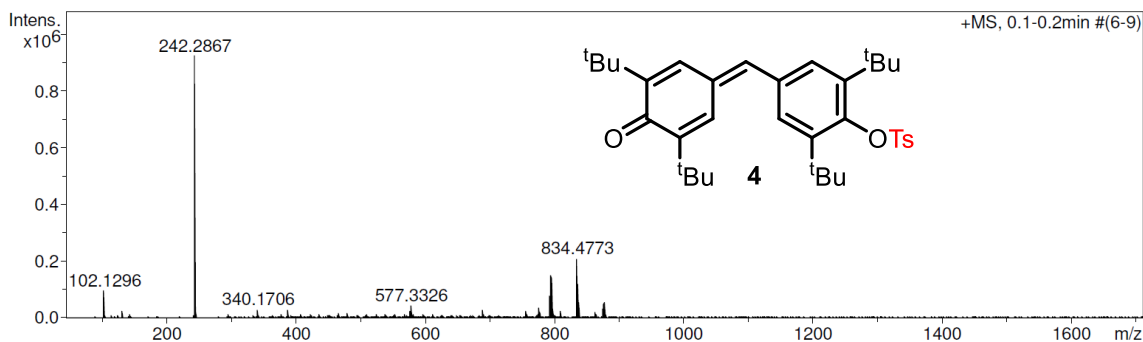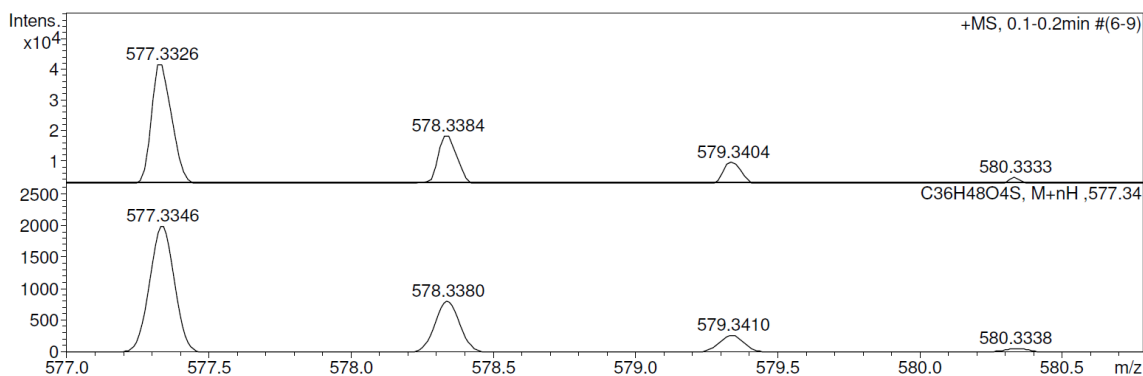

# Display Report

## Analysis Info

Analysis Name D:\Data\NEW USER DATA 2017\2019\SEP\27 sep\Dr.M.Kapur-PK-06-950.d  
Method tune\_low.m  
Sample Name PK-06-950  
Comment

Acquisition Date 9/27/2019 10:03:51 AM

Operator RUCHI  
Instrument micrOTOF-Q II 10330

## Acquisition Parameter

|             |            |                       |           |                  |           |
|-------------|------------|-----------------------|-----------|------------------|-----------|
| Source Type | ESI        | Ion Polarity          | Positive  | Set Nebulizer    | 0.4 Bar   |
| Focus       | Not active | Set Capillary         | 4600 V    | Set Dry Heater   | 180 °C    |
| Scan Begin  | 50 m/z     | Set End Plate Offset  | -500 V    | Set Dry Gas      | 4.0 l/min |
| Scan End    | 3000 m/z   | Set Collision Cell RF | 150.0 Vpp | Set Divert Valve | Waste     |

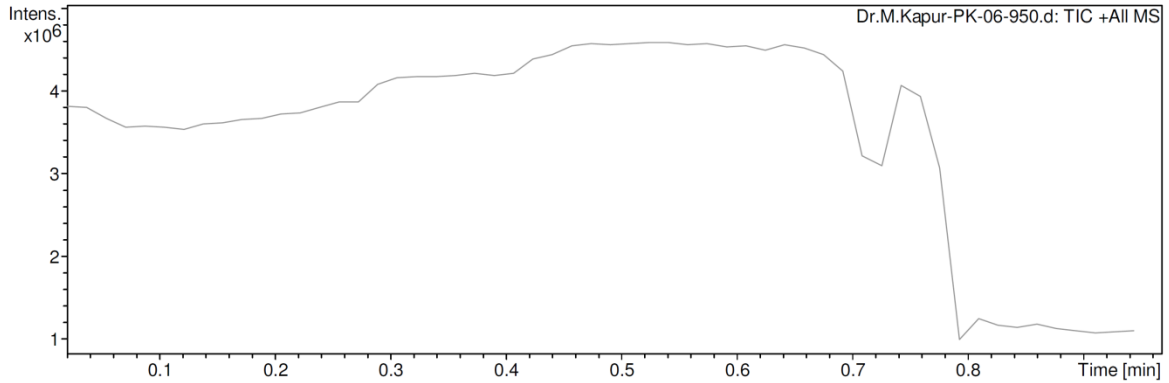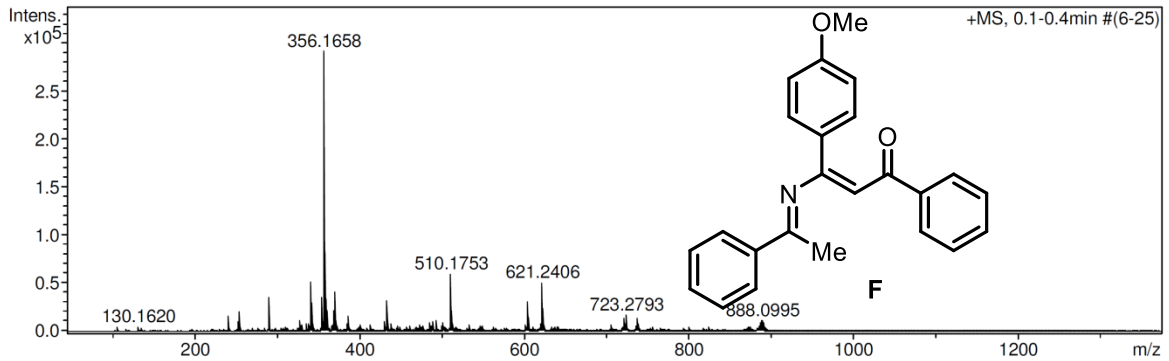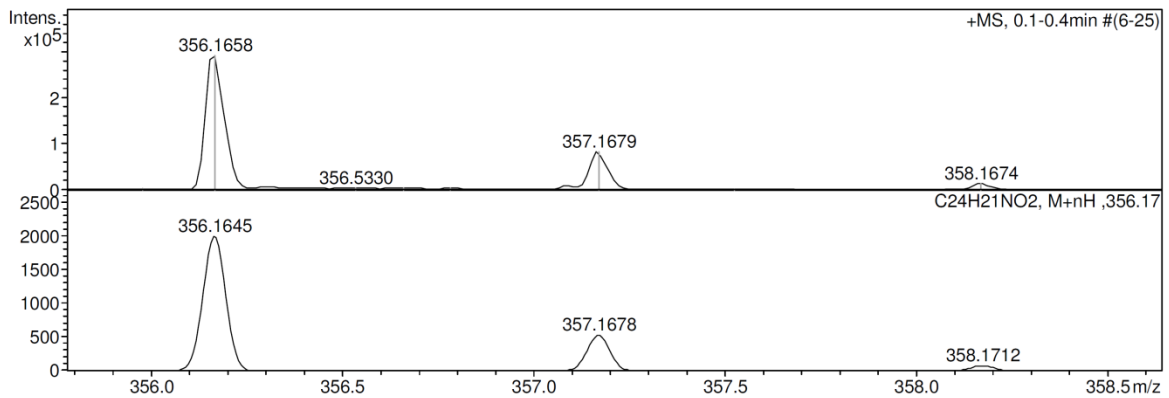

Supplement: d1ob00255d1.pdf [file d1ob00255d1.pdf]
